# 1 High-throughput micro-patterning platform reveals Nodal- 2 dependent dissection of peri-gastrulation-associated versus pre- 3 neurulation associated fate patterning 4

5 **Mukul Tewary<sup>1,2,3,7</sup>, Dominika Dziejzicka<sup>6,†</sup>, Joel Ostblom<sup>1,3,†</sup>, Laura Prochazka<sup>1,3</sup>, Nika Shakiba<sup>1,3</sup>,**  
6 **Curtis Woodford<sup>1,3</sup>, Elia Piccinini<sup>1,3</sup>, Alice Vickers<sup>7</sup>, Blaise Louis<sup>7</sup>, Nafees Rahman<sup>1,3</sup>, Davide Danovi<sup>7</sup>,**  
7 **Mieke Geens<sup>6</sup>, Fiona M. Watt<sup>7</sup>, Peter W. Zandstra<sup>1,2,3,4,5,\*</sup>**

8 <sup>1</sup> Institute of Biomaterials and Biomedical Engineering (IBBME), University of Toronto, Toronto, Ontario, M5S 3E1,  
9 Canada

10 <sup>2</sup> Collaborative Program in Developmental Biology, University of Toronto, Toronto, Ontario, M5S 3E1, Canada

11 <sup>3</sup> Terrence Donnelly Centre for Cellular & Biomolecular Research, University of Toronto, Toronto, Ontario, M5S 3E1,  
12 Canada

13 <sup>4</sup> Michael Smith Laboratories, University of British Columbia, Vancouver, British Columbia, Canada V6T 1Z4

14 <sup>5</sup> School of Biomedical Engineering, University of British Columbia, Vancouver, British Columbia, Canada V6T 1Z3

15 <sup>6</sup> Research Group Reproduction and Genetics, Faculty of Medicine and Pharmacy, Vrije Universiteit Brussel,  
16 Laarbeeklaan 103, 1090, Brussels, Belgium.

17 <sup>7</sup> Centre for Stem Cells & Regenerative Medicine, King's College London, Floor 28, Tower Wing, Guy's Hospital, Great  
18 Maze Pond, London SE1 9RT, UK.

19 †These authors contributed equally to this work.

20

21 \*Corresponding Author:

22 Peter W. Zandstra

23 Professor and Director, School of Biomedical Engineering

24 Director, Michael Smith Laboratories

25 University of British Columbia

26

27 Vancouver Campus

28 2185 East Mall

29 Vancouver, BC Canada V6T 1Z4

30 (Tel): (604) 822 2894 Email: [peter.zandstra@ubc.ca](mailto:peter.zandstra@ubc.ca)

31

## 32 Acknowledgements

33 We kindly thank Dr. Andras Nagy for providing the CA1 human embryonic stem cell line; Dr. Sean Palecek  
34 for providing the 7TGP(H9) line; Dr. Gordon Keller for providing the GKH9(H9), HES2, and the PDX1-  
35 GFP(MEL1) lines; and Dr. Andrew Elefanty for providing the RUNX1-GFP(HES3), and the MIXL1-  
36 GFP(HES3) lines. We thank Dr. Emanuel Nazareth for providing us with the micro-contact printing stamps.  
37 We gratefully acknowledge Dr. Alfonso Martinez Arias, Dr. James Briscoe, Dr. Teresa Rayon Alonso, Dr.  
38 Christopher Demers, and Dr. Celine Bauwens for providing insightful feedback to our manuscript. This work  
39 was funded by the Canadian Institutes for Health Research and Medicine by Design, a Canada First  
40 Research Excellence Program at the University of Toronto. MT received funding from CREATE Materials,  
41 Mimetics, and Manufacturing from the Natural Sciences and Engineering Research Council of Canada. DD  
42 is a PhD fellow of Research Foundation - Flanders (FWO). FMW gratefully acknowledges funding from the  
43 UK Medical Research Council and Wellcome Trust. PWZ is the Canada Research Chair in Stem Cell  
44 Bioengineering.

45

## 46 Abstract

47

48 *In vitro* models of post-implantation human development are valuable to the fields of regenerative medicine  
49 and developmental biology. Here, we report characterization of a robust *in vitro* platform that enabled high-  
50 content screening of multiple human pluripotent stem cell (hPSC) lines for their ability to undergo peri-  
51 gastrulation-like fate patterning upon BMP4 treatment of geometrically-confined colonies and observed  
52 significant heterogeneity in their differentiation propensities along a gastrulation associable and  
53 neuralization associable axis. This cell line associated heterogeneity was found to be attributable to  
54 endogenous nodal expression, with upregulation of Nodal correlated with expression of a gastrulation-  
55 associated gene profile, and Nodal downregulation correlated with a neurulation-associated gene profile  
56 expression. We harness this knowledge to establish a platform of pre-neurulation-like fate patterning in  
57 geometrically confined hPSC colonies that arises due to a stepwise activation of reaction-diffusion and  
58 positional-information. Our work identifies a Nodal signalling dependent switch in peri-gastrulation versus  
59 pre-neurulation-associated fate patterning in hPSC cells, provides a technology to robustly assay hPSC  
60 differentiation outcomes, and suggests conserved mechanisms of self-organized fate specification in  
61 differentiating epiblast and ectodermal tissues.

62

63

64

65

66

67

68

69

70

71

72

73

74

75

76

77

78

79

80

81

82

83

84

85

86

87

88

89

90

91

## 92 Introduction

93

94 Following implantation, embryos undergo a dramatic transformation mediated by tissue growth, cell  
95 movements, morphogenesis, and fate specifications resulting in the self-organized formation of the future  
96 body plan[1]. Post-implantation development to the neurula stage embryo is orchestrated by two vital  
97 developmentally conserved events called gastrulation and neurulation. Gastrulation is the developmental  
98 stage that segregates the pluripotent epiblast into the three multipotent germ layers, namely – the ectoderm,  
99 the mesoderm, and the endoderm[2–4]. Closely following gastrulation, the ectoderm undergoes further fate  
100 specification resulting in the patterned neural plate, neural plate border, and non-neural ectoderm regions  
101 thereby setting the stage for the onset of neurulation[5–9]. As neurulation proceeds, morphogenetic  
102 changes in these tissues result in the formation of the neural tube, the neural crest, and the epithelium  
103 respectively[10]. Initiation of the morphogenetic restructuring of the epiblast and the ectoderm occurs due  
104 to self-organized gradients of signalling molecules called *morphogens*, and morphogens belonging to the  
105 transforming growth factor beta (TGF $\beta$ ) superfamily, such as bone morphogenetic proteins (BMPs) and  
106 Nodal, play vital roles in these developmental stages.

107 Two biochemical models, Reaction-Diffusion (RD) and Positional-Information (PI), have strongly influenced  
108 our mechanistic understanding of self-organized fate specification during embryogenesis. The RD model  
109 describes how a homogeneously distributed morphogen can self-organize into a signalling gradient in a  
110 developing tissue due to the presence of an interaction network between the morphogen and its inhibitor,  
111 both of which are hypothesized to be diffusible molecules albeit with differential characteristic  
112 diffusivities[11–13]. Recent interpretations of RD have proposed that higher order (>2 molecules) network  
113 topologies can also underlie this self-organization[14]. The PI model describes how fate patterning can  
114 occur in a developing tissue due to an asymmetric morphogen distribution. The classical version of this  
115 paradigm hypothesized that the cells in the developing tissue sense the morphogen concentration in their  
116 immediate vicinity and acquire fates according to a threshold model[15,16]. Recent studies have updated  
117 this interpretation of the PI model and suggest that fates are acquired as a function of both the morphogen  
118 concentration and time of induction[17,18]. Although both RD and PI have been incredibly valuable in  
119 facilitating our comprehension of how developmental fates arise in a self-organized manner, these models  
120 are typically studied in individual signalling pathways. How multiple signalling pathways may work in concert  
121 to execute the rules specified by either RD or PI are not well understood.

122 Studying post-implantation developmental events, like gastrulation and neurulation, directly in human  
123 embryos would unequivocally provide the most reliable interpretations of human development. While  
124 valuable progress has been made of late in culturing human blastocysts *in vitro*[19,20], ethical concerns  
125 preclude their maintenance beyond 14 days – prior to the onset of gastrulation. On the other hand, recent  
126 studies on *in vivo* human development have provided some incredible insight into human development well  
127 into the fetal stages[21]. However, these studies are performed on specimens acquired from terminations  
128 or abortions that are typically accessible after the stages of gastrulation and neurulation have already  
129 transpired. Consequently, investigation of the mechanisms underpinning early post-implantation human  
130 embryonic development directly in human embryos is currently not possible. Nevertheless, the ability of  
131 stem cells to self-organize into structures *in vitro* that mimic aspects of post-implantation human  
132 development when provided appropriate biophysical and biochemical cues is well established[22–27]. We  
133 and others have used human pluripotent stem cells (hPSCs) to demonstrate that BMP4 treatment of  
134 geometrically confined hPSC colonies recapitulate some aspects of human peri-gastrulation-like self-  
135 organized fate patterning[24–26]. Although stem cell derived *in vitro* constructs are indisputably an  
136 incomplete representation of embryos, they can serve to provide insights into some cell organizational  
137 events that occur during the critically important post-implantation developmental stages.

138 In addition to providing insight into cell organizational aspects of early gastrulation-like behaviour, *in vitro*  
139 models of human development are also of great value to the field of regenerative medicine. This is because  
140 the ability of these models to specify early developmental cell fates highlights their suitability for  
141 characterization of differentiation propensities of hPSC lines. It is well known that hPSC lines – whether  
142 they are derived from embryos or from reprogrammed somatic cells – have an inherent bias to differentiate  
143 toward specific lineages[28–30]. Consequently, assays that can characterize different hPSC lines to identify  
144 these biases are of crucial importance to the field of regenerative medicine. Given the significance of  
145 developing approaches for achieve this goal, multiple assays have been established to address this need.  
146 The most prominent of these are assays like the *teratoma* assay[31], the *scorecard* assay[32], and the  
147 *pluritest*[33]. Although each of these approaches have their benefits, they are either lengthy, tedious and  
148 expensive (*teratoma* and *scorecard*), or do not directly measure differentiation of the hPSC lines (*pluritest*).  
149 In contrast, the peri-gastrulation-like assay provides a quantitative measure of the generation of lineage-  
150 specific fates, is rapid and dramatically inexpensive in comparison to approaches like the *teratoma* assay.  
151 In addition, it is readily amenable to high-content screening. However, to capitalize on the capabilities of  
152 this assay, we require a robust micropatterning platform that readily enables high-content studies.  
153 Conventional approaches to establish micropatterning platforms have employed techniques like micro-  
154 contact printing ( $\mu$ CP)[30,34–36], or other soft-lithography approaches[37–39]. In fact, we have previously  
155 reported a high-throughput  $\mu$ CP platform that enables geometric confinement in 96-well microtiter  
156 plates[30]. However, such approaches require a manual step of stamping the extracellular matrix (ECM)  
157 proteins to transfer the adhesive ‘islands’ onto the substrate of choice (glass, tissue culture polystyrene,  
158 etc.), which can result in variability in the patterning efficiency and fidelity between experiments, and  
159 between users. Additionally, they also employ soft-lithography based protocols that require costly  
160 equipment and access to clean rooms, which is detrimental to their broad utility. In contrast, techniques that  
161 employ the use of Deep UV (<200nm) light to photo-oxidize Polyethylene Glycol (PEG) coated substrates  
162 offer an attractive alternative to establish robust platforms that can enable high-content screening of hPSC  
163 lines [40,41].

164 Here, we report characterization of a high-content platform to produce microtiter plates that allow robust  
165 geometric confinement of a variety of adherent cell types at single cell resolution. Employing this platform,  
166 we tested the response of a panel of hPSC lines to a previously reported peri-gastrulation-like assay and  
167 observed significant variability in the induction of the Brachyury (BRA) expressing region between the lines.  
168 To probe the emergent differentiation trajectories of hPSC lines, we assessed their differentiation-  
169 associated gene expression profiles and found a switch-like response in the upregulation of gene profiles  
170 associated with either gastrulation or neurulation. This switch in gene expression showed a strong  
171 association with Nodal signalling; hPSC lines that exhibited higher levels of a gastrulation-associated gene  
172 expression profile also upregulated Nodal signalling, and those that exhibited a higher neurulation-  
173 associated gene expression profile downregulated Nodal signalling. We further validated this observation  
174 by inhibiting Nodal signalling in an hPSC line that induces gastrulation-like responses and validated the  
175 Nodal dependent switch of gastrulation versus neurulation associated gene expression switch. In addition,  
176 we report that geometrically-confined hPSC colonies induced to differentiate in the presence of BMP4 and  
177 a Nodal inhibitor undergo an RD-mediated self-organization of pSMAD1 activity and PI-mediated fate  
178 patterning into compartments that express markers like TFAP2A, SIX1, OTX2, and GATA3 indicative of  
179 differentiation toward ectodermal progenitors. We further demonstrate the ability of these progenitor regions  
180 to induce marker expression of the definitive fates of the respective compartments. Our findings provide  
181 insight into how hPSCs process information from morphogen inputs like BMP and Nodal to generate early  
182 developmental fates as output.

183

## 184 Results

185

### 186 A high-throughput platform for screening studies of geometrically confined cell colonies

187

188 Photo-oxidation of organic polymers like Polyethylene Glycol (PEG) – a widely reported bio-inert  
189 polymer[42], by Deep UV (DUV) light has been shown to upregulate carboxyl groups[40,41] which can be  
190 readily biofunctionalized with ECM proteins[43]. We employed this knowledge to develop a protocol to  
191 generate micropatterned, carboxyl-rich regions (**Fig. 1A**)[24]. We confirmed that incubation with Poly-L-  
192 Lysine-*grafted*-Polyethylene Glycol (PLL-g-PEG) resulted in a PEGylated surface on plasma treated  
193 borosilicate glass coverslips by probing the carbon 1s (C1s) spectra profile using X-Ray Photoelectron  
194 Spectroscopy (XPS). Consistent with previous reports[40], a peak indicating the presence of the C-O-C  
195 functional group present in PEG was detected at 286.6eV in the C1s spectrum on the PLL-g-PEG incubated  
196 glass coverslip, in addition to the peak at 285eV that was observed in the blank glass coverslip control (**Fig.**  
197 **1B**). DUV treatment of the PEGylated coverslips progressively reduced the peak at 286.6eV (**Fig. 1C**)  
198 suggesting photo-oxidation mediated ablation of the PEG layer. However, we were unable to detect any  
199 carboxyl presence, which has been reported to occur at 289eV[40]. We hypothesized that the photo-  
200 oxidation of the PEG during DUV treatment reduced the polymer thickness below the detection limit of the  
201 XPS equipment employed in this study, causing the absence of the carboxyl peak in the emission spectra.  
202 Given that biochemical assays circumvent the need of minimum polymer thickness to detect the presence  
203 of functional groups of interest, we opted to employ a previously reported assay based on the preferential  
204 affinity of Toluidine blue-O (TBO) to carboxyl functional groups (see Materials and Methods for assay  
205 description)[44] and asked if DUV treatment changed the amount of TBO adsorbed onto PEGylated  
206 coverslips. Indeed, DUV treatment resulted in an increase in the amount of TBO adsorption on PEGylated  
207 coverslips, with relative levels increasing with exposure times up to 12 minutes after which the relative  
208 levels detected decreased (**Fig. 1D**). These findings indicate that, consistent with previous reports[40,45],  
209 PLL-g-PEG incubation results in PEGylation of coverslips, and that the optimal exposure time to maximize  
210 the presence of carboxyl functional groups on the PEGylated coverslips in our experimental setup was 12  
211 minutes. To produce 96-well microtiter plates for patterned cell-culture surfaces, PEGylated large coverslips  
212 (110mmx74mm) were photopatterned by DUV exposure through Quartz photo-masks for 12 minutes and  
213 assembled to bottomless 96-well plates (**Fig. 1E**). Carboxyl groups were activated using carbodiimide  
214 chemistry[43] (**Fig. 1F**) to enable covalent attachment to primary amines on ECM molecules. This “PEG  
215 plates” platform enabled robust geometrical-confinement of a variety of cell types in colonies of a variety of  
216 shapes and sizes (**Fig. 1F, Sup. Fig. 1A-F**).

217 Given the vital role that interactions between cells and the surrounding ECM play on cellular responses[46],  
218 we next asked whether the approach of covalent attachment of ECM molecules interfered with fate  
219 decisions of hPSCs micropatterned on the PEG plates. We opted to employ a recently reported two-day  
220 assay using OCT4, and SOX2 expression as readouts to assess fate decisions in geometrically confined  
221 hPSC colonies[30] (**Fig. 1H**), and directly compared fate acquisition of hPSCs on the PEG plates with  $\mu$ CP  
222 plates, a micro-patterning technique that does not require any chemical immobilization of ECM molecules.  
223 We observed a highly correlated ( $R^2 > 0.9$ ) differentiation response between  $\mu$ CP and PEG plates (**Fig. 1I-**  
224 **J**). Furthermore, the PEG plates responded in a more reproducible manner than the  $\mu$ CP plates both in  
225 terms of the number of colonies achieved per well of a 96-well plate, and the number of cells attached per  
226 colony (**Sup. Fig. 1G-H**). Taken together, these data demonstrate that the PEG plates enable robust  
227 geometric-confinement of cell colonies, and the differentiation response of hPSC colonies micro-patterned  
228 using the PEG plates differentiate in a highly correlated manner to those micro-patterned on  $\mu$ CP plates;  
229 making them a valuable platform for high-throughput screening studies for the bioengineering community.

230

## 231 **hPSC line screen for peri-gastrulation-like patterning response yields variable responses**

232

233 Recent studies have reported that BMP4 treatment of geometrically confined hPSC colonies results in self-  
234 organized fate patterning of gastrulation-associated markers[24–26]. Notably, these studies demonstrated  
235 that the differentiating geometrically-confined hPSC colonies gave rise to a Brachyury (BRA) expressing  
236 compartment, representing a primitive-streak-like identity. Given that lineage-specific differentiation  
237 potential between hPSC lines is known to vary widely[28–30], we hypothesized that different hPSC lines  
238 would induce the primitive-streak-like compartment at different efficiencies. We employed our platform to  
239 evaluate the response of BMP4-treatment of geometrically-confined hPSC colonies (1mm in diameter) in a  
240 screen of the following five hPSC lines: H9-1, H9-2, HES2, MEL1, and HES3-1. The induction medium  
241 employed for this screen, and all subsequent experiments (unless otherwise stated) was a Knockout Serum  
242 Replacement based medium supplemented with BMP4 and bFGF (see Materials and Methods for  
243 composition). Although all hPSC lines tested expressed high levels of pluripotency markers at the start of  
244 the differentiation culture (**Fig. S2**), induction of BRA expression levels varied markedly between hPSC  
245 lines at 48h after BMP4 treatment (**Fig. 2A,C**). Notably, although the MEL1, and HES3-1 lines were unable  
246 to induce the expression of BRA, they did differentiate as indicated by the reduction of SOX2 expression  
247 relative to the starting population (**Fig. 2B-C, Fig. S2**). These data indicate that although all hPSC lines  
248 tested under these experimental conditions differentiated upon BMP4 treatment, induction of the primitive-  
249 streak-like compartment, as indicated by BRA expression, varied considerably.

250

## 251 **hPSC differentiation propensities are correlated with endogenous Nodal signalling**

252

253 We hypothesized that differences in regulation of key signalling pathways controlling mesendodermal  
254 induction between the tested hPSC lines underlay the variation in BRA expression observed in the peri-  
255 gastrulation-like patterning. To test this hypothesis, we employed a recently reported approach that  
256 addressed a similar question in mouse epiblast stem cell (mEpiSC) lines[47]. In their study, Kojima *et al*  
257 made embryoid bodies (EBs) out of various mEpiSC lines, allowed them to spontaneously differentiate in  
258 culture conditions unsupportive of pluripotency, and assayed for the expression of differentiation associated  
259 genes to compare the transcriptional and functional profiles between the lines[47]. Employing a similar  
260 approach, we generated EBs from nine hPSC lines – H9-3, H1, H7, HES3-2 in addition to the previous  
261 panel (complete list of lines and their respective culture conditions shown in **Table S1**) – and cultured them  
262 in conditions unsupportive of pluripotency for three days and analyzed differentiation marker gene  
263 expression levels daily (henceforth – ‘EB assay’) (**Fig. 3A**). We observed strong variation in expression  
264 profiles of differentiation associated genes between the test hPSC lines (**Fig. 3Bi**). To simplify data  
265 interpretation, we used unsupervised K-means clustering to segregate the hPSC lines into ‘Strong’,  
266 ‘Intermediate’, and ‘Weak’ expressers for each gene tested. This analysis revealed distinct sets of  
267 responses in the test lines where some lines upregulated expression of genes associated with gastrulation  
268 while others upregulated expression of neurulation-associated genes (**Fig. 3Bii**). In a recent study, Funa  
269 *et al* showed that Wnt signalling mediated differentiation of hPSCs results in fate acquisition that is  
270 dependent on Nodal signalling[48]. Specifically, the authors demonstrated that presence of Nodal signalling  
271 during Wnt mediated differentiation of hPSCs resulted in the acquisition of a primitive streak fate, whereas  
272 the absence of Nodal signalling during Wnt mediated differentiation resulted in the induction of the neural  
273 crest fate[48]. Given that the primitive streak is a gastrulation-associated fate, neural crest arises during  
274 neurulation, and the fact that our data demonstrated a gastrulation versus neurulation switch in

275 differentiating hPSC lines, we hypothesized that difference in Nodal signalling could be responsible for  
276 these gene expression profiles in our EB assay. Consistent with this hypothesis, the expression of Nodal  
277 and GDF3 (a Nodal target) in the differentiating hPSC lines showed a strong trend indicative of their  
278 upregulation linked with the induction of gastrulation-associated genes and their absence linked with the  
279 induction of neurulation-associated genes (**Fig. 3Ci**). Furthermore, clustering the hPSC lines with reference  
280 to the expression profiles of Nodal and GDF3 by either unsupervised K-means clustering (**Fig. 3Cii, S3**),  
281 or by hierarchical clustering based on Euclidean distance (**Fig. S4**), indicated that upregulation of Nodal  
282 and GDF3 coincided with gastrulation-associated gene expression, whereas their downregulation  
283 corresponded with neurulation-associated gene expression.

284

## 285 **Validation of gene expression responses in EB assay**

286

287 We next sought to validate the gene expression differences observed in the differentiating hPSC lines in  
288 the EB assay by asking if the variation translated to cell fate acquisition during directed differentiation.  
289 Given the key role that MIXL1 plays in the induction of definitive endoderm[49], Kojima *et al* investigated  
290 the expression profiles of Mixl1 in their EB assay with mEpiSCs, and demonstrated that Mixl1 expression  
291 was predictive of endodermal differentiation bias of the mEpiSC lines[47]. Importantly, much like MIXL1,  
292 EOMES is also known to play an important role in the endoderm specification[50,51]. Consistent with this  
293 idea, the 'Strong', 'Intermediate', and 'Weak' responders of the panel of hPSCs for both MIXL1, and EOMES  
294 contained the identical hPSC line cohorts (**Fig. 3Bii, S5A**), suggesting the likelihood of parallel functions of  
295 both these genes in differentiating hPSCs. To validate the gene expression profiles observed in our EB  
296 assay, we asked if the observed expression differences of these genes that critically regulate endoderm  
297 specification were able to predict the propensity of the hPSC lines to differentiate toward the definitive  
298 endodermal fates. Consequently, we differentiated the panel of hPSCs toward definitive endoderm using  
299 an established protocol (**Fig. S5B**), and consistent with the findings of Kojima *et al*[47], the expression  
300 profiles of endoderm specifiers (MIXL1 and EOMES in our case) in our EB assay closely matched the  
301 propensity of the hPSC lines to induce SOX17 expression upon directed differentiation toward the definitive  
302 endoderm fate (**Fig. S5C,D**). The differential expression profiles of MIXL1 and EOMES in the EB assay  
303 were also able to predict the induction efficiency of mature endodermal fates. Specifically, lines from the  
304 MIXL1/EOMES-Strong cluster outperformed candidate lines from the MIXL1/EOMES-Weak cluster in the  
305 induction of pancreatic progenitors as marked by the co-expression of PDX1 and NKX6.1 (**Fig. S5E**). These  
306 data provide protein level phenotypic validation of the variable gene expression observed in our EB assay.

307 Given that geometrically confined hPSC colonies are able to induce organized fate patterning[24–26], we  
308 asked if subjecting geometrically-confined hPSC colonies to defined endodermal differentiation conditions  
309 could be used as an assay to predict the differentiation propensity of hPSC lines. We selected three hPSC  
310 lines – H9-1, HES3-2, and HES3-1 – to represent each MIXL1/EOMES induction compartment defined in  
311 the EB assay (**Fig. 3Bii, S5A**), and differentiated them as geometrically-confined colonies in defined  
312 endodermal induction conditions (**Fig. S6A**). Interestingly, we found that the relative efficiency of SOX17  
313 and FOXA2 double-positive expression under these experimental conditions closely matched the  
314 endodermal lineage-bias of the lines as predicted by the EB assay (**Fig. S5A-D, Fig. S6B,C**). Taken  
315 together, these data validate the differential gene expression observed between the panel of hPSC lines  
316 by demonstrating congruence between MIXL1 and EOMES temporal dynamics and endoderm lineage bias  
317 of hPSC lines and provide proof-of-concept data that the defined differentiation protocols in geometrically-  
318 confined hPSC colonies can be used as quick assays to assess lineage bias of hPSC lines.

319

## 320 **Nodal dissects gastrulation versus neurulation associated hPSC differentiation**

321

322 Thus far, our data showed that in conditions that do not support pluripotency, differentiating embryoid  
323 bodies made from hPSC lines assume a transcriptional state associated with either gastrulation or  
324 neurulation, and endogenous Nodal dynamics correlated with this switch. However, whether the differential  
325 Nodal dynamics caused the switch in the acquired transcriptional state or if the association was merely  
326 correlative remained unclear. Given that BMP4 treatment has been previously reported to induce  
327 gastrulation-associated fate patterning[24–26], and that we have previously demonstrated the robust  
328 response of peri-gastrulation-like fate acquisition in the CA1 hPSC line[24], we revisited the peri-  
329 gastrulation-like model in hPSC colonies to test if Nodal signalling had a direct effect in regulating this  
330 switch. We asked if inducing geometrically confined colonies of the CA1 line to differentiate in response to  
331 BMP4 either in the presence or absence of a small molecule inhibitor of Alk4/5/7 receptors (SB431542,  
332 hereafter ‘SB’) which antagonizes Nodal signalling (**Fig. 3Di**) recapitulated the observed switch in emergent  
333 gene expression. After a three-day induction, we observed that colonies grown in the presence of SB  
334 upregulated genes associated with neurulation whereas those grown in the absence of SB upregulated  
335 genes associated with gastrulation (**Fig. 3Dii, Fig. S7**). These results are consistent with our hypothesis  
336 that Nodal signalling distinguishes gastrulation and neurulation-associated gene expression profiles in  
337 differentiating hPSCs. Given that differentiating hPSCs in the absence of Nodal signalling upregulated  
338 neurulation associated genes, we next set to investigate if BMP4 treatment of geometrically confined hPSC  
339 colonies in presence of SB gave rise to early neurulation-associated spatially patterned fate allocation.

340

## 341 **An RD network in BMP signalling can self-organize pSMAD1 activity independent of Nodal**

342

343 In a recent study, we demonstrated that the peri-gastrulation-like fate patterning in geometrically confined  
344 hPSC colonies occurs via a stepwise process of RD and PI where a BMP4-Noggin RD network self-  
345 organizes a phosphorylated SMAD1 (pSMAD1) signalling gradient within the colonies, resulting in the peri-  
346 gastrulation-like fates being patterned in a manner consistent with the PI paradigm[24]. We set out to  
347 investigate if a conserved mechanism would give rise to neurulation-associated fate patterning. As a first  
348 step, we asked if a BMP4-Noggin RD network governed pSMAD1 self-organization within the geometrically-  
349 confined hPSC colonies treated with BMP4 and SB. Consistent with the presence of a BMP4-Noggin RD  
350 network[24], we observed an upregulation of both BMP4 and Noggin upon BMP4 treatment of hPSCs in  
351 the presence of SB (**Fig. 4A**). We next asked if BMP4 treatment of geometrically-confined hPSC colonies  
352 in the presence of SB would result in the self-organized gradient of nuclear localized pSMAD1. Indeed,  
353 pSMAD1 activity within the colonies rapidly self-organized into a radial gradient under these experimental  
354 conditions (**Fig. 4B-D**). We next queried the importance of Noggin in the formation of the pSMAD1 gradient  
355 by generating two homozygous knock-outs of Noggin (‘C1’, and ‘C7’) using Crispr/CAS9 (characterization  
356 of lines shown in **Fig. S8**) and tested whether the absence of Noggin compromised the self-organization of  
357 pSMAD1. Consistent with our hypothesis that a BMP4-Noggin RD network was underlying the pSMAD1  
358 self-organization, the formation of the pSMAD1 signalling gradient was significantly compromised in Noggin  
359 knockout lines C1 and C7 compared to the wildtype control (**Fig. 4E-F**), indicating an integral involvement  
360 of BMP inhibitors like Noggin in the self-organization of the pSMAD1 signalling gradient. In our previous  
361 study using the peri-gastrulation-like model, we showed that a BMP4-Noggin RD computational model  
362 predicts the experimentally observed responses of a pSMAD1 self-organized gradient at the periphery and  
363 the center of the colonies to perturbations to the BMP4 dose in the induction medium and size of the  
364 geometrically-confined hPSC colony[24]. Specifically, we showed that reducing the BMP4 dose while  
365 maintaining the colony size reduces the levels of pSMAD1 at the periphery, and reducing the colony size



366 while maintaining a constant BMP4 dose in the induction medium results in an increase of pSMAD1 levels  
367 at the center of the colonies[24]. We reasoned that a conserved mechanism underlying the pSMAD1 self-  
368 organization would result in identical responses to these perturbations. Consistent with our anticipated  
369 results, reducing the BMP4 dose in the induction medium while maintaining the colony size resulted in a  
370 reduction of the detected immunofluorescent levels of nuclear localized pSMAD1 at the colony periphery  
371 (**Fig. S9A-C**). Furthermore, reducing the colony size while maintaining the BMP4 dose in the induction  
372 medium increased the detected immunofluorescent levels of nuclear localization of pSMAD1 at the colony  
373 centers (**Fig. S9D-E**). Taken together, these data demonstrate that in absence of Nodal signalling, pSMAD1  
374 activity in the geometrically-confined hPSC colonies self-organizes into a signalling gradient and suggest  
375 that a BMP4-Noggin RD system governs this observation (**Fig. 4G**) – consistent with our previous study[24].

376

### 377 **Nodal signalling contributes to the shape of the self-organized pSMAD1 gradient**

378

379 Our data indicate that the pSMAD1 signalling gradient self-organizes via an RD network present in the BMP  
380 signalling pathway where Noggin functions as an important inhibitor (**Fig. 4**). Given that Nodal signalling  
381 targets include multiple BMP antagonists such as Cer1, GDF3, Follistatin (FST), etc.[52], we asked if Nodal  
382 signalling contributed to the formation of the pSMAD1 signalling gradient in BMP4-treated geometrically  
383 confined hPSC colonies. To probe the role of Nodal in the observed pSMAD1 self-organization, we  
384 compared the formation of the pSMAD1 gradient in geometrically confined hPSC colonies of 500µm  
385 diameter treated with BMP4 for 24h where the induction media either contained Nodal or SB (**Fig. 5A**). The  
386 pSMAD1 signalling gradients formed in the presence and absence of Nodal signalling were significantly  
387 different from each other when treated with either 25ng/ml or 50ng/ml of BMP4 in the induction medium  
388 demonstrating the involvement of Nodal signalling in the formation of the self-organized signalling gradient  
389 (**Fig. 5B-D, S10A-C**). The results from these studies provided a few notable observations. First, in 500µm  
390 diameter colonies treated for 24h with BMP4 in presence of Nodal ligands, we observed two prominent  
391 peaks of pSMAD1 expression – one peak was observed at the periphery as expected from previous  
392 reports[24–26], and another on at the colony center that has not been previously reported in colonies of  
393 this size (**Fig. 5B-D**). This observation provides further support to the proposition that the self-organization  
394 of pSMAD1 arises via an RD mechanism which can result in spatial oscillations of morphogen activity[24],  
395 while providing evidence of crosstalk between BMP and Nodal signalling pathways in establishing the  
396 pSMAD1 signalling gradient. Another notable observation was that the pSMAD1 expression that declined  
397 from the periphery of the colonies dropped rapidly in the presence of Nodal ligands, but the decline was far  
398 more gradual in the presence of SB (**Fig. S10A-C**). Cells expressing discernible levels of pSMAD1 were  
399 observed much farther into the colony from the periphery than observed in the condition when Nodal ligands  
400 were present in the induction medium. Finally, the level of pSMAD1-associated immunofluorescence  
401 detected at the colony periphery in the presence of SB was significantly higher than the levels detected in  
402 the presence of Nodal (**Fig. 5B-D, S10A-C**). Taken together these data provides further justification for the  
403 hypothesis that the pSMAD1 signalling gradient arises via an RD mechanism, and demonstrate that Nodal  
404 signalling contributes to the shape of the self-organized pSMAD1 signalling gradient.

405 Since an RD network results in the morphogen gradient as a consequence of the expression of both  
406 activators and inhibitors of the morphogen[11,12], we hypothesized that the likely reasons for this  
407 observation could be due to either a change in the amount of activator (change in BMP4 levels) or the  
408 amount of inhibitor (change in the level of BMP antagonists) in the system. When we tested gene expression  
409 of activators and inhibitors after 24h of Vehicle versus Nodal or SB treatment on hPSCs which either allowed  
410 Nodal expression or dramatically downregulated it (**Fig. S10D**), SB treatment provoked an increased  
411 positive feedback as indicated by increased detected levels of BMP4 transcripts (**Fig. 5E**); and a reduced

412 negative feedback as indicated by significantly reduced transcript levels of BMP antagonists like CERL,  
413 GDF3, and FST (**Fig. 5F**). Taken together, these data suggest that Nodal signalling can contribute to the  
414 RD-mediated self-organization of the pSMAD1 signalling gradient; and that this contribution might occur  
415 due to a change in the levels of activators and antagonists of BMP signalling. Having established that  
416 pSMAD1 activity in the geometrically confined hPSC colonies treated with BMP4 and SB self-organizes  
417 into a signalling gradient, we next focused on investigating if this gradient induced the expression of fates  
418 associated with the differentiating ectoderm.

419

## 420 **Pre-neurulation-like fate patterning arises in a manner consistent with PI**

421

422 In the presence of Nodal signalling, BMP4 treatment of geometrically-confined hPSC colonies results in  
423 self-organized pSMAD1 gradient and a spatially patterned acquisition of gastrulation-associated fates[24].  
424 Although we observe the formation of the pSMAD1 gradient when geometrically-confined hPSC colonies  
425 are treated with BMP4 and SB (**Fig. 4-5**), we did not observe expression of key gastrulation associated  
426 markers like BRA, EOMES, SOX17, and GATA6 (**Fig. S11A-B**). These observations are consistent with  
427 the need of Nodal in inducing gastrulation-associated fates[24]. Since we observed that differentiating  
428 hPSCs in the absence of Nodal signalling upregulate a neurulation-associated gene profile (**Fig. 3D**), we  
429 asked if BMP4 and SB treatment of geometrically confined hPSC colonies resulted in the fate patterning  
430 associated with the differentiating ectoderm. After the germ layers segregate from the epiblast, a BMP  
431 signalling gradient along the medial-lateral axis in the developing ectoderm patterns the early pre-neural  
432 (PN) tissue at the medial end, and non-neural (NN) tissue at the lateral end appropriately arranging the  
433 tissue for the onset of neurulation[8]. The PN tissue gives rise to the neural plate (NP), which later folds to  
434 form the neural tube[5,7], and the NN tissue gives rise to the non-neural ectoderm (NNE) and the neural  
435 plate border (NPB)[8]. The NNE subsequently specifies to generate the epidermis and the NPB is a  
436 multipotent tissue that produces the neural crest (NC) and the craniofacial placodes in the anterior  
437 ectoderm[8,9,53–55]. The early PN region maintains the expression of SOX2 which is present in the  
438 epiblast, and the early NN regions induce expression of markers like GATA3[8]. Furthermore, markers like  
439 transcription factor AP2-alpha (TFAP2A) mark the NN, NNE, and maturing NPB region that marks the NC  
440 fate; and SIX1 are expressed in the maturing NPB region which marks panplacodal competent tissues[8].  
441 Consistent with our observation that BMP4 treatment in the absence of Nodal signalling upregulated genes  
442 associated with neurulation, we observed spatially segregated expression of SOX2 (PN), and GATA3 (NN)  
443 with concomitant expression of TFAP2A (NN, NPB), and SIX1 (panplacodal competent NPB) (**Fig. S11C**).  
444 We define this fate patterning as ‘pre-neurulation-like’ and using SOX2, and GATA3 as the markers of the  
445 PN, and NN tissues, we set out of test if the fate patterning arose in a manner consistent with the positional  
446 information (PI) paradigm.

447 Given that the PI paradigm posits that developmental fates arise due to thresholds of morphogen levels,  
448 and we asked if the perturbations of pSMAD1 levels at the colony periphery (**Fig. S9A-C**) and the colony  
449 center (**Fig. S9D-E**) resulted in pSMAD1 threshold mediated changes in expression of GATA3 (NN), and  
450 SOX2 (PN) fates respectively. Consistent with the idea of a pSMAD1 threshold dependent patterning of the  
451 PN and the NN tissues marked by GATA3, and SOX2, we find that reducing the pSMAD1 levels at the  
452 colony periphery (**Fig. S12A**) significantly reduced the GATA3 expression at the colony periphery (**Fig.**  
453 **S12B-C**) and increasing the pSMAD1 levels at the colony center (**Fig. S12D**) dramatically reduced the  
454 SOX2 expression (**Fig. S12E-F**). These data indicate that thresholds of pSMAD1 regulated the patterning  
455 of the SOX2 and GATA3 within the geometrically confined hPSC colonies. However, the formalization of  
456 the PI paradigm has been updated to include time as a critical parameter that patterns the developmental  
457 cell fates. Specifically, fate patterning mediated by PI is known to arise as a function of the morphogen

458 concentration and time of induction[17,18,24,56]. Consequently, we tested four different doses of BMP4  
459 (3.125ng/ml, 6.25ng/ml, 12.5ng/ml, and 25ng/ml) in the induction medium for four different induction times  
460 (12h, 24h, 36h, and 48h) and measured the levels of SOX2 and GATA3 detected. We observed that the  
461 fate patterning of GATA3 arose as a function of both the concentration of BMP4 in the induction medium  
462 and the time of induction (**Fig. 6A-B, C(i), Fig. S13**) indicating that the patterning within the geometrically  
463 confined colonies arises in a manner consistent with PI (**Fig. 6C(ii)**).

464

## 465 **A stepwise model of RD and PI governs pre-neurulation-like fate patterning**

466

467 Thus far, our data indicate that the pSMAD1 gradient was enforced outside-in within the geometrically  
468 confined hPSC colonies via a BMP4-Noggin RD network, and the pre-neurulation-like fates arose in a  
469 manner consistent with PI. In agreement with this idea, perturbing the shapes of the geometrically confined  
470 hPSC colonies did not result in fate patterning that deviated from the expected results (**Fig. S14**). However,  
471 a strong test of this overall model is asking if large colonies are able to generate stereotypical RD-like  
472 periodic signalling and fate profile. We previously reported that treatment of large geometrically confined  
473 hPSC colonies (3mm) with high doses of BMP4 would give rise to multiple foci of BMP activity as indicated  
474 by pSMAD1 staining, and patterned gastrulation-associated fates[24] – consistent with the expected spatial  
475 oscillations in accordance with the RD paradigm. Surprisingly, when we tested the response of pSMAD1  
476 spatial signalling dynamics in 3mm diameter colonies after BMP4 and SB treatment for 24h, we did not  
477 observe any obvious additional foci at either 50ng/ml (**Fig. S15**) or 200ng/ml (**Fig. S16**) BMP4 dose. Of  
478 note, the medium used for differentiating these geometrically confined hPSC colonies contained Knockout  
479 Serum Replacement (SR). An ingredient of SR called AlbumaxII is known to contain lipid associated  
480 proteins that have been shown to have an effect on hPSC biology – mechanisms of which are currently  
481 unclear[57,58]. We asked if using medium devoid of SR would rescue the expected appearance of multiple  
482 foci of pSMAD1 activity and GATA3 expression consistent with the predictions of the RD paradigm[24].  
483 Indeed, when we tested N2B27 medium which does not contain any AlbumaxII or SR (see Materials and  
484 Methods for composition), a 24h BMP4 and SB treatment of hPSC colonies of 3mm diameter resulted in  
485 rudimentary peaks of PSMAD1 activity at a BMP4 dose of 50ng/ml (**Fig. S17**) and prominent peaks of  
486 pSMAD1 activity at a dose of 200ng/ml (**Figs. S18-S19**). In addition, after 48h of BMP4 and SB treatment,  
487 although we did not note any additional foci of GATA3 in SR medium at BMP4 doses of either 50ng/ml  
488 (data not shown) or 200ng/ml (**Fig. S20**), in an N2B27 basal medium supplemented with SB, rudimentary  
489 peaks were observed at 50ng/ml of BMP4 (**Fig. S21**), and robust peaks were noted at 200ng/ml of BMP4  
490 (**Figs. 6D, S22**). These observations are consistent with the proposition that an RD network self-organizes  
491 BMP signalling activity (**Fig. 6E**) and the patterned fates arise in a manner consistent with PI (**Fig. 6C**),  
492 although we note that undefined components present in the induction medium contribute to deviations from  
493 the expected results.

494

## 495 **PN and NN regions give rise to definitive ectodermal fates**

496

497 As a final validation that BMP4 and SB treatment induced pre-neurulation-associated fates in the  
498 differentiating geometrically confined hPSC colonies, we asked if the patterned fates of the early PN and  
499 NN tissues were capable of inducing marker expression of definitive ectodermal fates like the NP, the NC,  
500 and the NNE. During embryogenesis, the NNE specifies toward the lateral end of the medial-lateral axis  
501 due to sustained levels of high BMP signalling in the ectoderm; the NC fate is specified at regions of

502 intermediate BMP levels that activate wnt signalling; and the NP is specified at the medial end where the  
503 tissue is subject to low/no BMP signalling. To test the competence of the pre-neurulation-like patterned  
504 colonies to give rise to these fates, we treated the colonies with BMP4 and SB for 24h, then tested three  
505 different treatments. Specifically, we either treated the colonies for a further 48h with BMP and SB and  
506 stained for keratins using a pan-keratin antibody and DLX5 (markers of NNE); or CHIR99021 ('CHIR' – a  
507 wnt agonist) and SB and stained for SOX10 (a marker of the NC fate); or for a period of 72h with Noggin  
508 and SB and stained for PAX6 (**Fig. 7A**). Consistent with our expected results, we observed that sustained  
509 BMP4 and SB treatment resulted in robust expression of DLX5 and showed clear staining of a pan-keratin  
510 antibody, indicating acquisition of an NNE identity (**Fig. 7B**). Furthermore, robust SOX10 staining was  
511 observed in colonies treated with CHIR and SB (**Fig. 7C**); and the colonies treated with Noggin and SB  
512 expressed PAX6 – a bona fide marker of the NP (**Fig. 7D**).

513 Taken together, our data are consistent with our hypothesis that a RD network in BMP signalling self-  
514 organizes the pSMAD1 gradient in geometrically confined hPSC colonies and Nodal signalling dissects  
515 peri-gastrulation-associated and pre-neurulation-associated fates (**Fig. 8**) that arise within these colonies  
516 in a manner consistent with PI.

517

## 518 Discussion

519

### 520 Screening platform for organoid-like structures and hPSC 'finger-printing' assay

521

522 Stem cells have a remarkable ability to self-organize into complex, higher-order tissues. Numerous studies  
523 have exploited this capacity of stem cells to generate structures that resemble organs and developmentally-  
524 relevant tissues[23,36,59–64]. These so-called 'organoids'[22,65] offer exciting possibilities as they can be  
525 employed as an experimental model for screening studies of organs/tissues of interest because they are  
526 derived from human cells while maintaining aspects of the structure and organization of the native tissues.  
527 Although the field has taken impressive strides towards making organoids for a variety of different organs,  
528 achieving a reproducible response between each organoid remains problematic. Furthermore, quantitative  
529 image analysis of immunofluorescent data from high-content organoid-based screening studies is currently  
530 challenging. An alternative approach for harnessing the potential of employing appropriately organized  
531 tissues in screening studies is to start with 2-dimensional cultures of the specific stem/progenitor cells with  
532 controlled geometries and allow them to self-organize into 'organoid-like' tissue surrogates. Of late,  
533 numerous studies have employed this approach to derive developmentally-relevant tissue organization  
534 [24–26,66,67]. Importantly, the response between individual organoid-like structures – for specific cell lines  
535 and medium conditions – is far more reproducible than what can currently be achieved in 3D organoids.  
536 Furthermore, given that these organoid-like structures are secured in position for the assay-duration, they  
537 are far more amenable to high-content image analysis than their 3D counterparts. The high-throughput  
538 platform we report enables robust geometric confinement of a variety of cell types and can be employed  
539 for numerous applications. Indeed, we have employed it to micro-pattern human PSCs, mouse PSCs,  
540 Retinal Pigmented Epithelial cells, human hemogenic, and pancreatic progenitors, human cardiomyocytes,  
541 human keratinocytes, mouse embryonic fibroblasts (MEFs), among others. This platform is poised to be  
542 employed for high-throughput drug screens of organoid-like surrogates of a variety of tissues.

543 As proof-of-principle for one such application, we employed the peri-gastrulation-like patterning to assess  
544 the differentiation propensity of hPSC lines. To capitalize on the well-established promise of hPSCs[68],  
545 many groups and initiatives have banked large numbers of human induced (hi)PSCs for future use in

546 regenerative medicine applications[28]. Importantly, it is widely recognized that different hiPSC lines – even  
547 if derived from identical genetic and tissue backgrounds – significantly vary in their ability to induce certain  
548 cell fates[28–30]. Consequently, the field needs an assay that enables rapid, high-content quantification of  
549 lineage bias of a starting pool of hPSCs from which an ideal line would be chosen to produce cells of a  
550 target fate. Although some assays currently attempt to provide a solution to this need[31–33], they are  
551 either qualitative, or prohibitively expensive and time consuming. In addition to the variation in BRA  
552 expression observed in the peri-gastrulation-like assay, we demonstrate that Wnt3a and ActivinA treatment  
553 of geometrically confined hPSC colonies of different hPSC lines results in variable endoderm induction  
554 efficiencies that mirror the predicted propensity both from directed differentiation toward definitive  
555 endoderm, and as indicated by the temporal dynamics of MIXL1 and EOMES in the EB assay. Notably, this  
556 observation parallels the observation reported by Kojima *et al* who showed that the temporal dynamics of  
557 MIXL1 during undirected differentiation of mEpiSC lines predicted endodermal differentiation  
558 propensity[47]. Consequently, we both corroborate the approach taken by Kojima *et al* in the human system  
559 and provide proof-of-concept data that indicates that morphogen treatment of geometrically confined hPSC  
560 colonies in defined conditions might represent a rapid, quantitative, and an inexpensive solution for finger-  
561 printing hPSCs.

562

## 563 **Involvement of Nodal in RD and PI associated with the BMP signalling**

564

565 Although both RD and PI have been studied in a variety of different model systems and have provided  
566 much insight into how developmental fate patterning occurs during embryogenesis, the question of how  
567 multiple different signalling pathways can work in concert to execute the rules associated with each  
568 paradigm remains unclear. In this study we demonstrate that Nodal signalling works in concert with BMP  
569 signalling to not only orchestrate the self-organization of pSMAD1 activity into a signalling gradient in a  
570 manner consistent with RD, but also coordinates the interpretation of the gradient into either peri-  
571 gastrulation-like, or pre-neurulation-like fate patterns in accordance with PI.

## 572 ***Reaction diffusion mechanisms***

573

574 In a recent study, we proposed that the pSMAD1 signalling gradient self-organizes under the regulation of  
575 a BMP4-Noggin RD system[24]. Our data in this study demonstrates that the pSMAD1 gradient formed in  
576 the presence and absence of Nodal signalling is significantly different (**Fig. 5, S10**); indicating the necessity  
577 of updating that proposed RD network topology to include Nodal signalling which is activated downstream  
578 of BMP signalling during the onset of mammalian gastrulation. Our data also suggest that the role played  
579 by Nodal signalling may, at least in part, be enacted by BMP antagonists that are targets of Nodal signalling,  
580 which is consistent with the fact that RD-mediated self-organization of morphogen signalling relies on the  
581 function of the morphogen inhibitors[11,12]. For instance, Nodal signalling gradient during zebrafish  
582 embryogenesis forms due to a Nodal-Lefty RD system[69], and Rodgers *et al* have demonstrated that  
583 removing the Lefty in an increased amount of Nodal signalling and specification of mesendoderm in the  
584 embryos during gastrulation[70]. Under experimental conditions where Nodal signalling is inhibited due to  
585 SB supplementation, Noggin, Follistatin (**Fig. 5F**), Gremlin family proteins[26], and possibly others can act  
586 as the inhibitors that enforce the pSMAD1 signalling gradient; and in conditions permissive of Nodal  
587 signalling, CERL and GDF3 and possibly others can further antagonize BMP signalling. In support of this  
588 notion, a previous study has reported that siRNA mediated inhibition of CERL and Lefty in experimental  
589 conditions permissive of Nodal signalling dramatically compromises the formation of peri-gastrulation-  
590 associated patterns (Fig. 6 in ref. 25). Taken together, the topology of the RD network in BMP signalling

591 needs to incorporate the role played by Nodal and potentially multiple BMP4 antagonists in addition to  
592 Noggin (like CERL, GDF3, FST among others). A deeper and more comprehensive understanding of the  
593 RD network in the BMP pathway requires further careful studies and computational platforms that enable  
594 studying multiple nodes in RD networks will be very valuable[14].

595 In Nodal-permissive experimental conditions, BMP4 treatment of geometrically confined hPSC colonies  
596 results in a gradient that downregulates sharply (**Fig. S10B-C**)[24–26]. This has led to a proposition that in  
597 BMP4 treated geometrically confined hPSC colonies, BMP signalling is active exclusively at the colony  
598 periphery and inactive everywhere else – a spatial profile that can be modelled as a step-function along the  
599 colony radius[71]. These authors claim that this apparent step-function-like response in the pSMAD1 activity  
600 occurs due to negative feedback enforced on BMP signalling at two different levels. First, by a BMP signalling  
601 mediated upregulation of BMP inhibitors[24,26], and second, due to a cell density mediated re-localization  
602 of BMP receptors from being present apically to becoming localized at basolateral regions, rendering them  
603 inaccessible for ligand mediated activation, everywhere in the colony except for the periphery [26].  
604 Consistent with their proposed model, we also identify a valuable role of BMP inhibitors in orchestrating the  
605 pSMAD1 signalling gradient. However, our data indicate that the underlying mechanism regulating the  
606 pSMAD1 self-organization is inconsistent with a wide-spread dampening of BMP signalling owing to  
607 inaccessible BMP receptors. In this study, in addition to the unambiguous RD-like spatial expression  
608 patterns of pSMAD1 and differentiation markers like GATA3, in large colonies (3mm diameter), we identify  
609 experimental conditions that result in prominent expression of pSMAD1 at the periphery and the center of  
610 hPSC colonies of 500µm diameter when treated with 25ng/ml of BMP4 for 24h – observations consistent  
611 with RD-like behaviour (**Fig. 5D**). Neither of these observed expression profiles would arise in conditions  
612 where BMP receptors were inaccessible everywhere except for the colony periphery. Additional insight has  
613 been provided by Xue et al [27] where it was demonstrated that when treated with BMP4 for an extended  
614 period of time (4 days), all cells in the hPSC colony expressed nuclear-localized pSMAD1 (Fig 5A-B in ref.  
615 27). We propose an alternative hypothesis for both the observed density dependent dampening, and the  
616 apparent step-function-like activity of BMP signalling observed in this system that invokes the involvement  
617 of Nodal signalling. Nodal is known to have a community effect whereby endogenous Nodal levels become  
618 more pronounced at higher cell densities[72,73], which would upregulate BMP antagonists downstream of  
619 Nodal signalling[52]. We argue that at increasing cell densities in the differentiating hPSC colonies, along  
620 with an increase in levels of BMP antagonists like Noggin and Gremlin family proteins owing to more cells  
621 secreting these inhibitors, there would likely be a dramatic increase in the levels of BMP antagonists like  
622 CERL, GDF3, FST which would upregulate due to pronounced levels of a community-effect mediated  
623 increase in endogenous Nodal. Abrogation of the fate patterning in this system in response to siRNA  
624 mediated inhibition of CERL and LEFTY (Fig 6 in ref 24) – an experimental condition that in principle should  
625 neither interfere with Noggin expression or change colony density, also supports our interpretation. Finally,  
626 our study provides direct evidence for the involvement of Nodal signalling in the apparent step-function-like  
627 response in pSMAD1 expression along the colony radius. When colonies of 500µm diameter were treated  
628 with 25ng/ml of BMP4 and SB, the signalling gradient formed showed no step-like response in the spatial  
629 pSMAD1 profile. Instead the signalling gradient gradually decreased in strength (as indicated by pSMAD1  
630 fluorescence levels) from the colony periphery to the colony center (**Fig 5A-D**). However, in the presence  
631 of Nodal signalling, the pSMAD1 signalling gradient, indeed, downregulated sharply – as expected from a  
632 step-function-like response. This is consistent with the proposition that in regions within the differentiating  
633 geometrically-confined hPSC colonies that have active Nodal signalling, which have been shown to be  
634 immediately interior to the peripheral cells[26], there would be heightened levels of BMP antagonists like  
635 CERL causing a dramatic reduction of BMP signalling.

636 Notably, in our study, we report different aspects that can result in variability in experimental results when  
637 studying the stereotypic RD-like periodic response in BMP signalling in the hPSC context. One such source

638 of variability is the level of endogenous Nodal signalling between different hPSC lines (**Fig. 3C**). Given the  
639 role that Nodal signalling plays in the formation of the pSMAD1 gradient (**Fig. 5, S10**), and the critical role  
640 it plays in ensuring the peri-gastrulation-associated fate patterning[24], the variability in endogenous levels  
641 of Nodal signalling can cause inconsistent responses between different cell lines and culture conditions.  
642 Importantly, a recent study has also shown drastically different responses in endogenous Nodal activation  
643 within the same hPSC line when cultured under different conditions for routine maintenance[74] –  
644 highlighting that even culture conditions for routine hPSC maintenance can have an effect in the response  
645 in the peri-gastrulation-like assay. Secondly, we observed that when geometrically confined hPSC colonies  
646 of 3mm diameter were treated with a high dose of BMP4 in SR medium, the stereotypical RD-like spatial  
647 periodicity of either pSMAD1 or GATA3 were not readily observed. However, changing the medium to an  
648 N2B27 based medium rescued these periodic responses. A key component of SR medium is Knockout  
649 Serum Replacement (KSR) which is known to contain lipid associated proteins like lysophosphatidic acid  
650 (LPA), and although the mechanism of action remains unclear, molecules like LPA have been shown to  
651 have an inhibitory effect on hPSC differentiation[57,58]. Given the above caveats associated with *in vitro*  
652 experiments, studies aimed at investigating the details of the RD network in BMP signalling in the hPSC  
653 context – especially those directed toward investigating the specifics of the spatial periodicity of morphogen  
654 activity and fate patterning, would benefit from removing these sources of variability between hPSC lines.  
655 Employing basal medium like N2B27 which is devoid of components like Albm<sub>ax</sub>II and LPA, avoiding  
656 undefined media like those conditioned on MEFs, and removing Nodal signalling from their system by SB  
657 supplementation represent experimental conditions better suited for these studies.

#### 658 **Positional information mechanisms**

659 In this study, we report that differentiating hPSCs (either culturing EBs in an FBS containing medium, or  
660 treatment of geometrically confined colonies with BMP4) upregulate a gastrulation-associated expression  
661 profile when endogenous Nodal signalling is active. However, in the case where Nodal signalling is  
662 downregulated, the same differentiation pulse upregulates a neurulation-associated gene expression  
663 profile. In addition, we demonstrated that perturbing Nodal signalling during BMP4 treatment of  
664 geometrically-confined hPSC colonies can result in a PI mediated interpretation of the emergent pSMAD1  
665 signalling gradient into peri-gastrulation-associated or pre-neurulation-associated fate patterning. Notably,  
666 inducing the pre-neurulation-like fates did not require an initial differentiation toward the ectodermal lineage  
667 prior to inducing a pSMAD1 signalling gradient within the colonies. This observation, although apparently  
668 contradictory from a developmental point of view, is consistent with previous *in vitro* studies. For instance,  
669 the neuromesodermal precursors – a developmental population that arises during late gastrulation and  
670 resides in the node-streak border, caudal lateral epiblast, and the chordoneural hinge sections in the  
671 posterior end of the elongating embryo[75–77], can be derived from hPSCs through a transient 2.5  
672 day pulse of wnt and bFGF[76]. In addition, similar to our observations, Funa *et al* employed activation  
673 of wnt signalling in hPSCs and identified a dissection of the primitive streak and the neural crest fates in  
674 the same assay durations[48]. These results suggest that genomic accessibility in hPSCs likely does not  
675 dictate the ability of inducing these early developmental fates.

676 Funa *et al* employed a chromatin-immunoprecipitation sequencing (CHIP-seq) study and identified that  $\beta$ -  
677 catenin is able to directly regulate both the primitive streak, and the neural crest genes[48]. However,  
678 expression of the primitive streak genes requires  $\beta$ -catenin to form a physical complex with SMAD2/3 – the  
679 effectors of Nodal signalling. Furthermore, upon the formation of the complex, the expression of genes  
680 associated with the neural crest fate were inhibited. The mechanism by which SMAD2/3 can prevent  $\beta$ -  
681 catenin mediated activation of the neural crest genes remains unclear. We hypothesize that a similar  
682 mechanism with BMP signalling could explain much of our data. Much like  $\beta$ -catenin, SMAD1 may activate  
683 a peri-gastrulation-associated gene profile in the presence of SMAD2/3 whereas in the absence of  
684 SMAD2/3, SMAD1 may activate pre-neurulation-associated genes. Future studies that employ a similar

685 approach to Funa *et al* by performing CHIP-seq studies to identify the binding dynamics of SMAD1 in the  
686 presence and absence of Nodal signalling can provide valuable insights toward a molecular understanding  
687 of how SMAD1 regulates the expression of the gastrulation versus neurulation associated gene profiles.

688

## 689 **Biochemical versus biomechanical regulation of pSMAD1 self-organization**

690

691 In a recent elegant study, Xue *et al* demonstrated that a pSMAD1 gradient can also arise within the  
692 geometrically confined hPSC colonies during extended culture (9 days) in medium that was supplemented  
693 with low levels of BMP inhibitors and SB[27]. Notably, these culture conditions in their study ensured that  
694 the differentiating hPSCs were subjected to minimal amounts of BMP ligands during differentiation. Under  
695 these conditions, the authors demonstrated that biomechanical characteristics of the cells in the colony like  
696 size and contractile forces exerted could autonomously activate BMP signalling at the cells in the colony  
697 periphery[10,27]. In addition, the authors demonstrated that if provided a transient, 24h long, pulse of wnt  
698 activation, the colonies can give rise to regionalized fates associated with the neural plate, and the neural  
699 plate border[27]. Furthermore, they show that siRNA mediated Noggin inhibition did not significantly alter  
700 the patterning of the neuroectodermal fates. Although their observations provide an additional mechanism  
701 by which a signalling gradient could self-organize during development – a biomechanical paradigm, they  
702 do not contradict our findings. This is because the mechanism proposed by Xue *et al* functions under  
703 conditions where the hPSCs are subjected to low/minimal levels of BMP ligands whereas our model  
704 considers conditions where the medium is supplemented with BMP4. In fact, when the authors added BMP  
705 ligands in their induction media over the course of their assay, they observed widespread activation of  
706 pSMAD1 activity and abrogation of the expression of the neural plate marker. This highlights the presence  
707 of a signalling hierarchy in platforms that begin with 2D cell populations, where biochemical signals may  
708 overwhelm biomechanical systems. However, in 3D starting populations and *in vivo*, the relationship  
709 between the biochemical and biomechanical cues is likely far more balanced and it would be interesting to  
710 speculate whether these two paradigms could perform redundant functions to ensure developmental  
711 robustness at varying levels of presence of BMP ligands. Finally, the fact that Xue *et al* observe the  
712 regionalization of the neural plate and neural plate border identities after extended culture durations  
713 provides further evidence to the proposition that the fate patterning occurs in a manner consistent with PI  
714 as at reduced levels of BMP signalling, the fate patterning would be predicted to arise after longer durations.  
715 In addition, under these conditions where BMP signalling has not activated at sufficiently high levels,  
716 consistent with the PI model, the authors did not observe fates associated with the non-neural ectodermal  
717 identity.

718

## 719 **Conclusions**

720 In conclusion, we report characterization of a high-throughput microtiter plate that enables robust geometric  
721 confinement of a variety of cell types. We employ this platform to screen hPSC lines for their ability to induce  
722 gastrulation-associated fate patterning and observe a Nodal-dependent response in the efficiency of BRA  
723 (a gastrulation-associated fate) induction, thereby providing a proof of principle of the ability of this platform  
724 to be employed for high-throughput screening experiments. In addition, we identify that differentiating  
725 hPSCs upregulate either gastrulation, or neurulation associated gene profiles in a Nodal signalling  
726 dependent manner. Further, we demonstrate that in BMP4 treated geometrically-confined hPSC colonies,  
727 Nodal signalling can affect the RD mediated self-organization of pSMAD1 – the downstream effector of  
728 BMP signalling; and that it also regulates the switch between peri-gastrulation-like and pre-neurulation-like  
729 identities in PI mediated fate patterning occurring within the differentiating colonies. Finally, consistent with



730 a previous study that investigated peri-gastrulation-like fate patterning in BMP4 treated hPSC colonies, we  
731 demonstrate that the pre-neurulation-like fate patterning follows a stepwise model of RD and PI, hinting at  
732 possible conservation of the underlying mechanism that regulates differentiation of the epiblast and  
733 ectoderm in human development.

734

## 735 **Materials and Methods**

### 736 **Human Pluripotent Stem Cell Culture**

737 CA1 human embryonic stem cell line was provided by Dr. Andras Nagy (Samuel Lunenfeld Research  
738 Institute). H9-1 was provided by Dr. Sean Palecek (University of Wisconsin – Madison). H9-2, HES2, and  
739 MEL1 (PDX1-GFP) were provided by Dr. Gordon Keller (McEwen Centre for Regenerative  
740 Medicine/University Health Network). HES3-1, and HES3-2 were provided by Dr. Andrew Elefany (Monash  
741 University). H1, H7, H9-3 were acquired from WiCell Research Institute. For routine maintenance, CA1,  
742 H9-1, and H9-2 were cultured on Geltrex (Life Technologies, diluted 1:50) coated 6-well tissue culture plates  
743 using mTeSR1 medium (StemCell Technologies) as per manufacturer's instructions. The cells were  
744 passaged at a ratio of 1:12 using ReleSR (StemCell Technologies) per manufacturer's instructions. For the  
745 first 24h after passage, the cells were cultured in ROCK inhibitor Y-27632 to increase cell viability. The  
746 medium was changed every day and passaged every 4-5 days or when the cells reached 75-80%  
747 confluence. For routine maintenance, H1, H7, H9-3, HES3-1, HES3-2, MEL1, HES2 were cultured on  
748 feeder layers of irradiated MEFs in Dulbecco's Modified Eagle's Medium (DMEM) (Invitrogen), 1%  
749 Penicillin/Streptomycin, 1% non-essential amino acids, 0.1mM  $\beta$ -mercaptoethanol, 1% Glutamax, 2% B27  
750 minus retinoic acid, 20% KnockOut serum replacement (**referred to as 'SR' medium**) and supplemented  
751 with 20 ng ml<sup>-1</sup> FGF-2 (PeproTech). H1, H7, and H9-3 cells were passaged 1:6 every 4–5 days and were  
752 disassociated into small clumps using 0.1% collagenase IV (Invitrogen). HES3-1, HES3-2 were passaged  
753 1:24 every 4-5 days and dissociated using TrypLE Express (Invitrogen). All cell lines were confirmed  
754 negative for mycoplasma contamination.

### 755 **Preparation of PEG plates**

756 Platform set up, and XPS studies were performed using 22mmx22mm borosilicate coverslips (Fisher  
757 Scientific), and the 96-well plate platform was developed using custom sized (110mmx74mm) Nexterion-D  
758 Borosilicate thin glass coverslips (SCHOTT). The glass coverslips were activated in a plasma cleaner  
759 (Herrick Plasma) for 3 minutes at 700 mTorr and incubated with 1 ml of Poly-L-Lysine-grafted-Polyethylene  
760 Glycol (PLL-g-PEG(5KD), SUSOS,) at a concentration of 1 mg/ml at 37°C overnight. The glass slides were  
761 then rinsed with ddH<sub>2</sub>O and dried. The desired patterns were transferred to the surface of the PEG-coated  
762 side of the coverslip by photo-oxidizing select regions of the substrate using Deep UV exposure for 10  
763 minutes through a Quartz photomask in a UV-Ozone cleaner (Jelight). Bottomless 96-well plates were  
764 plasma treated for 3 minutes at 700 mTorr and the patterned slides were glued to the bottomless plates to  
765 produce micro-titer plates with patterned cell culture surfaces. Adhesives validated for biocompatibility  
766 standards ISO10993, and USP Class VI were utilized for the assembly of the plates. Prior to seeding cells  
767 onto the plates, the wells were activated with N-(3-Dimethylaminopropyl)-N'-ethylcarbodiimide  
768 hydrochloride (Sigma) and N-Hydroxysuccinimide (Sigma) for 20 minutes. The plates were thoroughly  
769 washed three times with ddH<sub>2</sub>O, and incubated with Geltrex (diluted 1:150) for 4h at room temperature on  
770 an orbital shaker. After incubation, the plate was washed with Phosphate Buffered Saline (PBS) at least  
771 three times to get rid of any passively adsorbed extracellular matrix (ECM) and seeded with cells to develop  
772 micro-patterned hPSC colonies.

### 773 **Comparison between PEG plates with $\mu$ CP plates**

774 PEG plates (as described above) and  $\mu$ CP plates (as reported previously[30]) were generated with  
775 patterned islands of 200 $\mu$ m in diameter with 500 $\mu$ m separation between adjacent colonies. A single cell  
776 suspension of CA1s was generated by incubating in 1ml of TrypLE (Invitrogen) per well for 3 minutes at  
777 37°C. The TrypLE was blocked using in equal volume SR medium (see 'Human pluripotent stem cell culture'  
778 section above for composition) and the cells were dissociated by pipetting to generate a single cell  
779 suspension. The cells were centrifuged into a pellet and the supernatant aspirated to remove any residual  
780 TrypLE. A single cell suspension was then generated in SR medium supplemented with 10 $\mu$ l of ROCKi and  
781 20ng/ml of bFGF at a cell density of 500,000 cells/ml and 100 $\mu$ l of the suspension was plated onto the PEG  
782 and  $\mu$ CP plates for a period of 2-3h till robust cell attachment was observed. The cells were then left to  
783 make a confluent colony overnight (~12h). Once confluent colonies were observed, the differentiation was  
784 performed using 100 $\mu$ l per well of the following inductive conditions in Apel (Stem Cell Technologies) basal  
785 media for 48h – bFGF (40ng/ml) +SB431542 (10 $\mu$ M) to induce differentiation into ectodermal fates, BMP4  
786 (10ng/ml) +ActivinA (100ng/ml) to induce mesendodermal differentiation, BMP4 (40ng/ml) to induce extra-  
787 embryonic/'other' fates, and as controls, Nutristem, and basal Apel media were used. After 48h, the colonies  
788 were fixed, and stained for OCT4 and SOX2. The relative percentages of the colonies that were positive  
789 for the two markers were used to identify the early fates induced within the colonies. A detailed description  
790 of the assay has been previously reported[30].

### 791 **Peri-gastrulation-like and pre-neurulation-like fate patterning induction**

792 Except for the experiments where we demonstrated the spatial oscillations of pSMAD1 and the pre-  
793 neurulation-like fates in 3mm diameter colonies, all fate patterning studies were performed in SR medium  
794 (see 'Human pluripotent stem cell culture' section above for composition) supplemented with 100ng/ml of  
795 bFGF. The studies where we demonstrate the spatial oscillations of the morphogen activity and fate  
796 patterning were performed in N2B27 medium. N2B27 medium was composed of 93% Dulbecco's Modified  
797 Eagle's Medium (DMEM) (Invitrogen), 1% Penicillin/Streptomycin, 1% non- essential amino acids, 0.1mM  
798  $\beta$ -mercaptoethanol, 1% Glutamax, 1% N2 Supplement, 2% B27 Supplement minus retinoic acid.

799 The hPSC lines that were cultured in feeder-dependent techniques for routine maintenance were first feeder  
800 depleted by passaging the cells at 1:3 on geltrex and cultured on Nutristem. To seed cells onto ECM-  
801 immobilized PEG-UV 96-well plates, a single cell suspension of the hPSC lines was generated as described  
802 above. The cells were centrifuged and re-suspended at a concentration of  $1 \times 10^6$  cells/ml in SR medium  
803 supplemented with 20ng/ml bFGF (R&D) and 10 $\mu$ M ROCK inhibitor Y-27632. Wells were seeded in the  
804 PEG-patterned 96 well plates at a density of 60,000 cells/well for plates with colonies of 500 $\mu$ m diameter,  
805 80,000 cells/well for colonies of 1mm diameter, and at 120,000 cells/well for plates with colonies of 3mm  
806 diameter and incubated for 2-3h at 37°C. After 2-3h, the medium was changed to SR without ROCKi. When  
807 confluent colonies were observed (12-18h after seeding), the peri-gastrulation-like induction or pre-  
808 neurulation-like induction was initiated as follows. A) Peri-gastrulation-like induction (**Fig. 2**) was performed  
809 in SR medium supplemented with 100ng/ml of bFGF (R&D) and 50ng/ml of BMP4. B) Unless otherwise  
810 stated, pre-neurulation-like induction with 500 $\mu$ m colonies was performed with SR medium (see 'Human  
811 pluripotent stem cell culture' section above for composition) supplemented with 100ng/ml of bFGF with  
812 25ng/ml of BMP4, and 10 $\mu$ M SB431542 ('SB'). C) Endoderm fingerprinting assay (Fig. S6) was performed  
813 with N2B27 medium supplemented with 25ng/ml of Wnt3A and 50ng/ml of ActivinA. D) RD-like periodic  
814 pattern induction of pSMAD1 activity, and pre-neurulation-like fates was tested in both SR, and N2B27  
815 mediums. In the case of SR, the medium was supplemented with 10 $\mu$ M SB, 100ng/ml of bFGF, and either  
816 50ng/ml or 200ng/ml of BMP4. In the case of N2B27, the medium was supplemented with 10 $\mu$ M SB,  
817 10ng/ml of bFGF, and either 50ng/ml or 200ng/ml of BMP4.

## 818 **Embryoid body differentiation assay**

819 The differentiation media for the EB assay contained 76% DMEM, 20% Fetal Bovine Serum (FBS), 1%  
820 Penicillin/Streptomycin, 1% non- essential amino acids, 0.1mM  $\beta$ -mercaptoethanol, 1% Glutamax, (all  
821 Invitrogen). A large volume of the medium was prepared with a single batch of FBS and frozen at -80C and  
822 was used to differentiate the EBs made from all the hPSC lines tested. EB formation from the hPSC lines  
823 was achieved by generating a single cell suspension (as described in the section above) directly in the  
824 differentiation media supplemented with ROCKi for the first day. The cell suspension was then plated on  
825 24-well microwell plates (Aggrewell - 400 $\mu$ m, Stem Cell Technologies). The seeding density was chosen to  
826 allow generation of size-controlled EBs (~500cells/EB) for all hPSC lines. The media was carefully replaced  
827 with differentiation media without ROCKi 24hours after seeding to ensure that the EBs were not disturbed.  
828 EBs were harvested from the Aggrewell plates each day by adding 1ml of DMEM into the wells and pipetting  
829 till the EBs lifted off from the microwells, and frozen as a pellet at -80C till gene expression was assessed  
830 using qPCR.

## 831 **CA1 *Nog*<sup>-/-</sup> cell line generation**

832 CA1 Noggin knock out lines were generated using a CRISPR/Cas9 mediated donor-free dual knock-out  
833 using a previously described strategy[78]. The sgRNA design was performed with CRISPRko Azimuth 2.0  
834 (Broad Institute) using human Noggin (NCBI ID9241) as entry data and SpCas9 for the nuclease. The  
835 software ranks sgRNAs with high on-target activities and low off-target activities in a combined rank[79].  
836 We chose sgRNA1 (5'-CTGTACGCGTGGACGACCT-3') and sgRNA2 (5'-  
837 CAAAGGGCTAGAGTTCTCCG-3') with a combined rank of 4 and 1, respectively. sgRNA1 & 2 can be used  
838 individually or applied together to produce Noggin knock-out. Latter leads to a deletion of a DNA fragment  
839 of 112 bp and to a predetermined stop codon (**Fig. S8A**).

840 Transfection and evaluation of cutting efficiency: We first evaluated the cutting efficiency of SpCas9 for  
841 each individual gRNA on a population level. For this, we seeded CA1 hESC into 24-well plates such that  
842 they are 50-60 % confluent at the day of transfection (approx. 24h after seeding). CmgRNA were generated  
843 by mixing 1 $\mu$ M AltR CRISPR crRNA (IDT, custom oligo entry) with 1 $\mu$ M AltR CRISPR tacrRNA (IDT, Cat.  
844 1073189), annealed at 95°C for 5 min and cooled down at room temperature. GeneArtTMPlatinumTM Cas9  
845 Nuclease (Invitrogen, B25641) was diluted to 1 $\mu$ M using Opti-MEM (Thermo Fisher Scientific, 31985062).  
846 Cas9 and cmgRNA were mixed at a concentration of 0.3 $\mu$ M each in 25 $\mu$ l of OptiMEM. After incubation at  
847 room temperature for 5 minutes, 1 $\mu$ l of EditProTM Stem (MTI Globalstem) diluted in 25 $\mu$ l of Opti-MEM was  
848 added to the Cas9/cmgRNA complex and incubated for 15 minutes at room temperature. Before adding  
849 the reagent -Cas9/cmgRNA mix to the cells, medium was replaced with 500 $\mu$ l / 24 well of fresh mTeSR.  
850 Medium was replaced 24h after transfection. 48h after transfection, cells were harvested by incubation in  
851 Gentle Cell Dissociation Reagent (STEMCELL Technologies, 07174) for 7 min. Dissociation reagent was  
852 removed and cells were resuspended in cultivation medium, pipetted to single cells and spin down for 5min  
853 at 200g. Cells were resuspended in 25 $\mu$ l of Cell Lysis Buffer mixed with 1 $\mu$ l Protein Degradar, both from  
854 the GeneArtTM Genomic Cleavage Detection Kit (Invitrogen, A24372). Cells were lysed at 68°C for 15min,  
855 95°C for 10min and kept on ice. PCR was performed using Phusion High Fidelity DNA Polymerase (NEB,  
856 M0530) according to manufactures protocol using 2 $\mu$ l of the cell lysate. Primer for the PCR were the  
857 following: (fwd) 5'CTACGACCCAGGCTTCATGGC'3, (rev) 5'GACGGCTTGACACCATGC3'. PCR  
858 product of un-transfected and transfected samples were analyzed on 2.5% MetaPhore Agarose Gel (Lonza)  
859 PCR products were analyzed using GeneArt Genomic Cleavage Detection Kit (Invitrogen, A24372)  
860 according to manufacturer's protocol. The cleaved and un-cleaved samples were loaded on 2.5%  
861 MetaPhore Agarose Gel (Lonza) and the bands were analyzed using ImageJ. Percentage of gene  
862 modification was calculated as described in a previous report (**Fig. S8B**)[80]. Additionally, PCR products  
863 were send for Sanger Sequencing. Chromatograms were analyzed using TIDE[81].

864 Cell line generation: The cell line was generated using gRNA1 & 2 mixed with Cas9 at 0.3 $\mu$ M each. The  
865 transfection was proceeded with exact same protocol as described above using 6 x 24 wells. After three  
866 days, cells reached confluency and were seeded to 6 well plates at sufficiently low densities to achieve  
867 clonal growth from single cells. Approximately 7 days after seeding, single clones were picked and  
868 transferred to 96 well plates. 24 clones were expanded for 2 passages and PCR was performed on cell  
869 lysates as described above (**Fig. S8C**). PCR products were send for Sanger Sequencing and aligned to  
870 (NCBI ID9241) and to untransfected wildtype sequence (**Fig. S8C**). Clones with clear loss of function  
871 mutations in both alleles (C1 and C7) were further characterized for their pluripotency marker expression  
872 (**Fig. S8D**).

### 873 **Quantitative PCR analysis**

874 RNA extraction for all gene expression analysis studies was performed using Qiagen RNAeasy miniprep  
875 columns according to the manufacturer's protocol, and the cDNA was generated using Superscript III  
876 reverse transcriptase (Invitrogen) as per the manufacturer's instructions. The generated cDNA was mixed  
877 with primers for the genes of interest and SYBR green mix (Roche, Sigma) and the samples were run on  
878 an Applied Biosystems QuantStudio 6 flex real-time PCR machine. The relative expression of genes of  
879 interest was determined by the delta–delta cycle threshold ( $\Delta\Delta$ Ct) method with the expression of GAPDH  
880 as an internal reference. Primer sequences used are provided in Supplementary Information (**Table S2**).

### 881 **Immunofluorescent staining, and image analysis**

882 After the peri-gastrulation-like or the pre-neurulation-like induction was completed, the plates were fixed  
883 with 3.7% paraformaldehyde for 20 min, rinsed three times with PBS and then permeabilized with 100%  
884 methanol for 3 min. After permeabilization, the patterned colonies were blocked using 10% fetal bovine  
885 serum (Invitrogen) in PBS overnight at 4°C. Primary antibodies were incubated at 4°C overnight (antibody  
886 sources and concentrations are shown in **Table S3**). The following day, the primary antibodies were  
887 removed, and the plates were washed three times with PBS followed by incubation with the secondary  
888 antibodies and DAPI nuclear antibody at room temperature for 1 h. Single-cell data were acquired by  
889 scanning the plates using the Cellomics Arrayscan VTI platform using the 'TargetActivation.V4' bioassay  
890 algorithm. This algorithm utilizes the expression intensity in the DAPI channel to identify individual nuclei in  
891 all fields imaged and acquires the associated intensity of proteins of interest localized within the identified  
892 region. As previously described[24], single-cell data extracted from fluorescent images were exported into  
893 our custom built software, ContextExplorer (Ostblom et al, unpublished), which classifies cells into colonies  
894 via the DBSCAN algorithm. Cartesian coordinates relative to the colony centroid are computed for every  
895 cell within a colony. Hexagonal binning is used to group cells from multiple colonies according to their  
896 relative location within a colony. Average protein expression of cells within a bin is represented by the color  
897 map, which is normalized to the lowest and highest expressing hexagonal bins. In the line plots of spatial  
898 expression trends, cells are grouped in annular bins according to the Euclidean distance between a cell  
899 and the colony centroid. For each colony, the mean expression of all cells within an annular bin is computed.  
900 The average of all the colony means is displayed in the line plot together with the standard deviation and  
901 the 95% confidence interval (CI).

902

### 903 **Figure Legends**

904 **Figure 1: Development of Poly(ethylene glycol) based micro-patterning platform.** A) Scheme of  
905 protocol for transferring carboxyl-rich micro-patterns onto glass coverslips. B-C) Carbon 1s (C1s) spectra  
906 acquired using X-Ray Photoelectron Spectroscopy. B) C1s spectra of glass coverslip incubated with PLL-  
907 g-PEG compared to blank glass coverslip. C) C1s spectra of PLL-g-PEG coated glass coverslips photo-  
908 exposed to Deep-UV light for different times of exposure. Dotted lines signify binding energies associated

909 with untreated glass (285.0eV), or presence of PEG (286.6eV). D) Line plot representation of detected  
910 absorbance at 580nm wavelength of coverslips photo-oxidized for different times of exposure indicating the  
911 relative amounts of adsorbed Toluidine Blue-O (assay details in Materials and Methods). Data represented  
912 as mean ( $\pm$ s.d) for three technical replicates. The assay was performed once to identify optimal exposure  
913 times for our experimental setup. E) Overview of assembly procedure to produce 96-well micro-titer plates  
914 with micro-patterned culture surface. F) Overview of carbodiimide based ECM protein immobilization  
915 scheme. G) Representative immunofluorescent images of micropatterned hPSCs colonies stained for  
916 OCT4, and SOX2. H) Overview of a previously described micro-patterning based hPSC differentiation  
917 assay[30] using OCT4 and SOX2 expression levels as indicators of early fate choices to compare PEG and  
918  $\mu$ CP plates. I) Quantified compartments of early fate choices as defined in H), in both PEG, and  $\mu$ CP plates.  
919 The media conditions tested were 'NS' – Nutristem, Apel (vehicle for the following), 'BMP' (BMP4), 'BA'  
920 (BMP4+ActivinA), 'FSB' (bFGF+SB431542) (See Materials and Methods for concentration details). Data  
921 represented as mean (+s.d) of four independent replicates. The fate choice responses of hPSCs on both  
922 the plates were highly correlated ( $R^2 > 0.9$ ). J) Representative immunofluorescent images of hPSC colonies  
923 stained for OCT4, and SOX2 in the different media conditions tested. Scale bars indicate 500 $\mu$ m.

924 **Figure 2: Variability in peri-gastrulation-like induction observed between test hPSC lines.** A-B)  
925 Quantified expression of BRA (A), and SOX2 (B) observed within the assayed hPSC lines tested. Number  
926 of colonies were 252, 245, 327, 288, and 304 for GKH9, 7TGP, HES2, PDX1-GFP, and MIXL1-GFP  
927 respectively. Each data point represents individual colonies identified. Data pooled from two experiments.  
928 C) Representative immunofluorescent images for BRA, SOX2, and CDX2 for the test hPSC lines. Scale  
929 bar represents 200 $\mu$ m.

930 **Figure 3: Nodal dissects gastrulation and neurulation associated gene expression profiles.** A)  
931 Overview of experimental setup for Embryoid Body (EB) assay. EBs were made from each test hPSC line  
932 and allowed to spontaneously differentiate in presence of Fetal Bovine Serum (FBS) for three days. B)  
933 Observed gene expression dynamics of test cell lines when differentiated as EBs in FBS. i) Observed gene  
934 expression for a panel of differentiation associated genes (shown under 'Gastrulation' and 'Neurulation'  
935 groups) along with POU5F1 (OCT4) and NANOG. Data shown as heatmap of mean expression of each  
936 day from three biological replicates (s.d. not shown), represented as  $\log_2$ (Fold Change) relative to the D0  
937 sample of respective hPSC line. 'Pluri' indicates the pluripotency associated genes. ii) Heatmap  
938 representation of (B(i)) with the panel of hPSC lines clustered into three groups of 'Strong', 'Intermediate',  
939 and 'Weak' responders for each gene using unsupervised K-means clustering. 'Pluri' indicates the  
940 pluripotency associated genes. C) Nodal dynamics during EB assay. i) Observed gene expression of Nodal  
941 and a Nodal signalling target (GDF3). Data shown as heatmap of mean expression of each day from three  
942 biological replicates (expression levels for individual replicates shown in Fig. S3B), represented as  $\log_2$ (Fold  
943 Change) relative to the D0 sample of the respective hPSC line. ii) Heatmap representation of (C(i)) with the  
944 panel of hPSC lines clustered into three groups of 'Strong', 'Intermediate', and 'Weak' responders for Nodal,  
945 and GDF3 using unsupervised K-Means clustering. D) Effect of modulation of Nodal during previously  
946 reported peri-gastrulation-like assay using geometrically-confined colonies of the 'CA1' hPSC line[24]. i)  
947 Overview of experimental setup. Geometrically-confined colonies of CA1s were induced to differentiate for  
948 three days, with either a two-day pulse of BMP4 and Nodal, and just Nodal for the third day; or a two-day  
949 pulse of BMP4 and an inhibitor of Nodal signalling (SB431542 – 'SB'), and just SB for the third day. The  
950 vehicle employed in this experiment was SR medium (see Materials and Methods for composition). ii)  
951 Heatmap representation of a panel of differentiation genes associated with either gastrulation, or  
952 neurulation. Dark blue represents higher levels of expression, whereas light blue represents lower levels of  
953 expression. Data shown as mean of three biological replicates. Expression levels of individual replicates  
954 shown in **Fig. S7**.

955 **Figure 4: Interaction network between BMP4-Noggin underlies self-organization of pSMAD1**  
956 **gradient.** A) Temporal gene expression for BMP4 and Noggin at 4h, 14h, 20h, and 24h after BMP4  
957 treatment. Data shown as mean  $\pm$  s.d. of three independent experiments. The p-values shown were  
958 calculated using Kruskal-Wallis test. B) Representative immunofluorescent images of geometrically  
959 confined hPSC colonies of 500 $\mu$ m in diameter stained for pSMAD1 after different times (0h, 6h, 12h, 18h,  
960 and 24h) of BMP4 exposure. Scale bar represents 200 $\mu$ m. C) Average pSMAD1 intensity represented as  
961 overlays of 231, 241, 222, 238, and 228 colonies for respective induction times. Data pooled from two  
962 experiments. D) The average radial trends of pSMAD1 at each duration shown as line plots. Standard  
963 deviations shown in grey, and 95% confidence intervals shown in black. E-G) Response of pSMAD1 self-  
964 organization in homozygous knockout lines of Noggin. E) Representative immunofluorescent images of  
965 geometrically confined hPSC colonies of wild-type (WT), Noggin<sup>-/-</sup> clones C1, and C7 (characterization  
966 shown in Fig. S8) stained for pSMAD1 after 24h of BMP4 exposure. F) The average radial trends of  
967 pSMAD1 shown for the WT, C1, and C7 clones. Data pooled from two experiments and include 151, 150,  
968 150 colonies for each line respectively. G) The average radial trends of pSMAD1 at each duration shown  
969 as line plots. Standard deviations shown in grey, and 95% confidence intervals shown in black. The p-  
970 values were calculated using Mann-Whitney U-test. \* indicates  $p < 0.0001$  for each clone relative to the WT  
971 control. H) Model of reaction-diffusion mediated self-organization of pSMAD1.

972 **Figure 5: Nodal signalling contributes to the formation of the pSMAD1 gradient.** A) (i-ii) Overview of  
973 experimental setup. (i) Geometrically confined hPSC colonies were treated with BMP4 for 24h. (ii) Media  
974 tested. 'Vehicle' indicated SR medium (see Materials and Methods for composition) supplemented with  
975 BMP4 and bFGF. 'Nodal' and 'SB' indicated vehicle supplemented with either Nodal (100ng/ml) or 10 $\mu$ M  
976 SB431542. B-D) Perturbing Nodal signalling results in a significant change in the pSMAD1 self-organized  
977 gradient formation. B) Average pSMAD1 intensity represented as overlays of 188, and 163 colonies for  
978 Nodal and SB conditions respectively. Data pooled from two experiments. C) The average radial trends of  
979 pSMAD1 shown as line plots. (i) Line plots shown individually for SB and NODAL conditions. Standard  
980 deviations shown in grey, and 95% confidence intervals shown in black. (ii) Line plots represented in the  
981 same graph. The p-values were calculated using Mann-Whitney U-test. \* indicates  $p < 0.0001$ . D)  
982 Representative immunofluorescence images of 500 $\mu$ m diameter hPSC colonies stained for pSMAD1 after  
983 24h of BMP4 treatment in 'Vehicle' and 'SB' conditions (average response shown in B). Scalebar represents  
984 200 $\mu$ m. White arrows indicate regions where second peak of pSMAD1 appears. White triangles indicate  
985 regions of discernable pSMAD1 levels that appear to be lower than the levels at the colony periphery. E)  
986 Gene expression for BMP4 after 24h of treatment with either 'Vehicle' or 'SB' media (described in A(ii)) of  
987 hPSCs. Data shown as mean + s.d. (n=3, technical replicates, independent wells). The p-value was  
988 calculated using two-sided t-test. F) Gene expression of Activin-Nodal pathway associated targets that are  
989 known antagonists of BMP signalling (CERL, GDF3, Follistatin – 'FST'). The data represented as mean  $\pm$   
990 s.d. of hPSCs from three technical replicates, independent wells. The experiment was performed once. The  
991 p-values were calculated using two-sided Student's t-test.

992 **Figure 6: Pre-neurulation-like fates arise in a manner consistent with positional-information.** A)  
993 Representative immunofluorescence images of 500 $\mu$ m diameter colonies stained for SOX2, and GATA3  
994 after different doses (6.25ng/ml, 12.5ng/ml, 25ng/ml, and 50ng/ml) and times of BMP4 treatment. Scale bar  
995 represents 200 $\mu$ m. B) Mean expression levels of SOX2 and GATA 3 represented as heat maps. Darker  
996 shades represent higher expression levels and lighter shades represent lower levels of expression (for  
997 detailed data see Fig. S12). C) (i-ii) Model of GATA3 patterning. (i) Overview of (B) where GATA3 is  
998 expressed as a function of BMP4 dose and induction time. (ii) Fate patterning of GATA3 consistent with  
999 positional information. 'T' indicates the presumptive threshold of fate switch to GATA3. D) Treatment of  
1000 geometrically confined-hPSC colonies of 3mm diameter with 200ng/ml of BMP4 and SB for 48h results in  
1001 multiple peaks of GATA3 expressing regions consistent with RD hypothesis. i) Representative stitched

1002 images of 3mm diameter hPSC colonies differentiated with 200ng/ml of BMP4 for 48h. Scale bar represents  
1003 1mm. ii) Zoomed section outlined by the white square in (i). White arrows indicate regions of high GATA3  
1004 and low SOX2 expression indicative of PI mediated fate patterning due to presumptive localized pSMAD1  
1005 expression. The experiment was repeated three times. Additional images shown in **Fig. S22**.

1006 **Figure 7: Pre-neurulation-like platform can give rise to definitive fates associated with the**  
1007 **differentiating ectoderm.** AA) Overview of the experimental setup. Geometrically confined hPSC colonies  
1008 were treated with BMP4 for 24h, and then treated with one of the following conditions: SB and Noggin for  
1009 72h and subsequently stained for PAX6; SB and CHIR99021 (CHIR) for 48h and stained for SOX10; SB  
1010 and BMP4 for 48h and stained for DLX5 and TROMA1. B) Expression of NP marker (PAX6) in colonies  
1011 differentiated with BMP4 for 24h and SB+Noggin for 72h. (i) Quantified expression observed for PAX6  
1012 observed in the treated and control conditions. The number of colonies were 76 for control, and 606 for  
1013 treated. (ii) Immunofluorescent images of representative colonies stained for PAX6. C) Expression of NC  
1014 marker (SOX10) in colonies differentiated with BMP4 for 24h and SB+CHIR for 48h. (i) Quantified  
1015 expression observed for SOX10 observed in the treated and control conditions. The number of colonies  
1016 were 286 for control, and 493 for treated. (ii) Immunofluorescent images of representative colonies stained  
1017 for SOX10. D) Expression of NNE markers (DLX5 and TROMA1) in colonies differentiated with BMP4 for  
1018 24h and SB+BMP4 for 48h. (i) Quantified expression observed for DLX5 and TROMA1 observed in the  
1019 treated and control conditions. The number of colonies were 163 for control, and 376 for treated. (ii)  
1020 Immunofluorescent images of representative colonies stained for DLX5 and TROMA1. For B(i), C(i), and  
1021 D(i), each data point represents an identified colony, and bars represent mean  $\pm$  s.d. The data were pooled  
1022 from two experiments, and the p-values were measured using Mann-Whitney U test.

1023 **Figure 8: Mechanism of Nodal dependent fate patterning in the geometrically confined hPSC**  
1024 **colonies.** A) Model overview for self-organization of pSMAD1: An RD network in BMP signalling which  
1025 comprises BMP ligands, NODAL, and BMP antagonists self-organizes the pSMAD1 gradient within the  
1026 geometrically confined hPSC colonies. B) (i-ii) pSMAD1 self-organization in the presence of Nodal. (i) BMP  
1027 antagonists downstream of Nodal signalling (like CERL, GDF3, FST) can contribute to the self-organization  
1028 of the pSMAD1 gradient. (ii) The presence of BMP antagonists in the Nodal pathway downregulates  
1029 pSMAD1 levels enforcing a sharp gradient from the colony periphery. Green region signifies region of Nodal  
1030 mediated downregulation of BMP signalling. Dotted black line represents gradient that would arise in the  
1031 absence of BMP antagonists in the Nodal pathway. Purple line represents gradient established due to  
1032 pronounced inhibition of BMP signalling. C) (i-ii) pSMAD1 self-organization in the absence of Nodal. (i) In  
1033 the absence of Nodal signalling the overall level of BMP inhibitors is reduced due to removal of CERL,  
1034 GDF3, and reduction in FST levels. (ii) The established gradient is more gradual relative to when Nodal  
1035 signalling is active. Dotted black line represents gradient that would arise in the absence of BMP  
1036 antagonists in the Nodal pathway. Purple line represents gradient established due to pronounced inhibition  
1037 of BMP signalling. D) In the presence of Nodal signalling, the fate patterning recapitulates the peri-  
1038 gastrulation-like stage of human development. In the absence of Nodal signalling, the fate patterning  
1039 recapitulates pre-neurulation-like stage of human development. In both instances, the fate patterning arises  
1040 in a manner consistent with positional information.

1041 **Figure S1: Characterization of PEG plates.** A-F) Representative images acquired on PEG plates for  
1042 multiple cell types. A) Mouse embryonic fibroblasts (MEFs) stained for  $\beta$ -actin in green, and DAPI in blue.  
1043 B) Hemogenic endothelial cells stained for VECAD in green and DAPI in blue. C) Primary human  
1044 keratinocytes stained for Keratin 14 in green and Involucrin in red. D) Mouse embryonic stem cells stained  
1045 for OCT4 in green. E) BMP4 treated human induced pluripotent stem cells stained for SOX17 in red. F)  
1046 Human endodermal progenitor cells allowed to generate outgrowths stained for NKX6.1 in red and PDX1  
1047 in green. G-H) Comparison of patterning response on PEG plates vs  $\mu$ CP plates. G) Number of colonies

1048 identified per well between PEG and  $\mu$ CP plates. Each dot represents the number of colonies identified per  
1049 well for 120 randomly chosen wells between the four replicates of PEG vs  $\mu$ CP plates. Number of cells  
1050 identified per colony between PEG and  $\mu$ CP plates. Each dot represents the average number of cells per  
1051 colony for 120 randomly chosen wells between the four replicates of PEG vs  $\mu$ CP plates. H) Representative  
1052 images of hPSCs micropatterned in 96-well plates using PEG-based technique vs  $\mu$ CP.

1053 **Figure S2: Starting populations of test hPSC lines show high expression of pluripotency associated**  
1054 **proteins.** FACS plots of OCT4, SOX2, and NANOG of starting populations of H9-1, H9-2, MEL1, and  
1055 HES3-1.

1056 **Figure S3: Nodal expression dynamics in FBS mediated non-specific differentiation of hPSC**  
1057 **embryoid bodies.** Temporal dynamics of Nodal for the test hPSC lines shown for the three clusters of  
1058 Nodal-Strong, Nodal-Intermediate, and Nodal-weak (**Fig. 3Bii**). Each dot represents the detected  
1059 expression level for a biological replicate. Bar plots represent mean  $\pm$  s.d.

1060 **Figure S4: Hierarchical clustering of Nodal and GDF3 is consistent with unsupervised K-means**  
1061 **clustering.** A) Hierarchical clustering of the Nodal expression in the test hPSC lines based on Euclidian  
1062 distance reveals similar clusters as the ones from unsupervised K-means clustering. B) Hierarchical  
1063 clustering of the Nodal target (GDF3) expression in the test hPSC lines based on Euclidian distance reveals  
1064 similar clusters as the ones from unsupervised K-means clustering of Nodal signalling.

1065 **Figure S5: MIXL1 and EOMES dynamics during EB assay predict endoderm differentiation**  
1066 **propensity of hPSC lines.** A) Panel of hPSC lines clustered into three groups of 'Strong', 'Medium', and  
1067 'Weak' responders for (i) MIXL1, and (ii) EOMES from Fig 3Bii. The expression levels of MIXL1 and EOMES  
1068 in the pluripotent state (Day 0) shown in the boxes adjacent to the heatmaps. B) Overview of the protocol  
1069 for directed differentiation toward definitive endoderm. The cells were treated with Wnt3a from 0h-24h, and  
1070 Wnt3a+ActivinA from 24h-72h. C-D) Efficiency of SOX17 induction in the test hPSCs using the protocol in  
1071 B). C) Black dash denotes the mean of three independent replicates represented by the dots. D) FACS  
1072 plots for individual replicates from C). E) FACS plots showing the efficiency of induction of pancreatic  
1073 progenitors as indicated by the expression of PDX1, and NKX6.1 for hPSC lines in 'Strong' and 'Weak'  
1074 clusters from A). The differentiation was performed using a previously described protocol[82]. The data are  
1075 from one biological replicate.

1076 **Figure S6: Peri-gastrulation-like assay predicts endoderm differentiation bias of hPSC lines.** A)  
1077 Overview of assay for predicting endodermal differentiation bias. Geometrically-confined hPSC lines were  
1078 treated with Wnt+ActivinA for 48hours prior to fixation and staining. B) Quantified fraction of endodermal  
1079 cells, defined as double positive for SOX17, and FOXA2, detected within the geometrically-confined hPSC  
1080 colonies. The hPSC lines chosen were one each from the 'Strong', 'Medium', and 'Weak' clusters of MIXL1,  
1081 and EOMES from **Fig. S5A**. Each data point represents an individual identified colony. Data pooled from  
1082 two different experiments and represented as mean  $\pm$  s.d.; p-values calculated using one-way ANOVA  
1083 (Kruskal-Wallis test). C) Representative immunofluorescent images of colonies from B) stained for DAPI,  
1084 SOX17, and FOXA2. Scale bar represents 500 $\mu$ m.

1085 **Figure S7: Modulation of Nodal signalling during BMP4 treatment of geometrically-confined hPSC**  
1086 **colonies reveals a switch in expression of gastrulation vs neurulation associated genes.** Response  
1087 of modulation of Nodal signalling in expression of gastrulation versus neurulation associated genes in BMP4  
1088 treated geometrically-confined CA1 colonies (assay details in Fig 3Di). Individual data points represent  
1089 biological replicates. Data shown as mean  $\pm$  s.d., and p-values calculated using Mann-Whitney U test.



1090 **Figure S8 Generation of CA1 Noggin<sup>-/-</sup> cell line using CRISPR/Cas9:** A) Generation of CA1 Nog<sup>-/-</sup> cell  
1091 line using CRISPR/Cas9: a) Schematic of dual knock-strategy for Noggin (NCBI ID9241). Nucleotide  
1092 sequence of gRNA binding regions (gRNA 1; green and gRNA2; orange) with expected cutting sites (green  
1093 nucleotides) and resulting repaired DNA strand. The gRNAs have been selected such that repaired DNA  
1094 will lead to a predetermined stop codon (TGA). B) Analysis of gRNA cutting efficiency on transfected hESC  
1095 CA1 population 48h post-transfection. Top left: PCR from transfected cell lysate. Top right: PCR fragments  
1096 processed with and without T7 Endonuclease (Genomic Cleavage Assay). Bottom: Sanger sequencing of  
1097 PCR product and subsequent decomposition and analysis using TIDE online analyzing tool. PCR from  
1098 wildtype CA1 was used as control. Bar chart shows frequency, type, and position of mutations. C) A total  
1099 of 24 clones were analyzed by PCR (top left) and by Sanger Sequencing (top right). Sequencing revealed  
1100 2 clones (C1 and C7) with homozygous knock-out sequences (bottom). The two bands (two alleles) of C7  
1101 were separately purified from Agarose gel before sequencing. D) Pluripotency marker staining of C1 and  
1102 C7 lines of CA1s.

1103 **Figure S9: pSMAD1 gradient formation is consistent with a BMP4-Noggin RD network mediated self-**  
1104 **organization.** A) (i-ii) Radial gradient formed in colonies of 500µm diameter treated with varying doses of  
1105 BMP4 in induction medium (3.125ng/ml, 6.25ng/ml, 12.5ng/ml, and 25ng/ml) represented as line plots. (i)  
1106 The gradients shown individually. Data pooled from two experiments, and represent 299, 293, 302, and  
1107 343 colonies for the respective doses. Standard deviations shown in grey and 95% confidence intervals  
1108 shown in black. (ii) Line plots shown in one graph for comparison of pSMAD1 levels at colony periphery.  
1109 B) Average pSMAD1 expression levels shown as overlay of the detected colonies (numbers mentioned in  
1110 A). C) Representative immunofluorescent images of pSMAD1 for respective conditions. Scale bars  
1111 represent 200µm. D) Average pSMAD1 expression of 987, 528, 280, 182, 107, and 89 colonies for varying  
1112 colony sizes (200µm, 300µm 400µm, 500µm, 600µm, and 700µm) treated with 25ng/ml of BMP4 in  
1113 induction medium. Data pooled from two experiments. Standard deviations shown in grey and 95%  
1114 confidence intervals shown in black. Scale bars represent 200µm.

1115 **Figure S10: Nodal signalling contributes to the formation of the pSMAD1 gradient.** A) Representative  
1116 immunofluorescence images of 500µm diameter hPSC colonies stained for pSMAD1 after 24h of BMP4  
1117 treatment. Scalebar represents 200µm. B) Average pSMAD1 intensity represented as overlays of 368 and  
1118 411 colonies for Nodal and SB conditions respectively. Data pooled from two experiments. C) (i-ii) The  
1119 average radial trends of pSMAD1 shown as line plots. (i) Line plots shown individually for SB and NODAL  
1120 conditions. Standard deviations shown in grey, and 95% confidence intervals shown in black. (ii) Line plots  
1121 represented in the same graph. The p-values were calculated using Mann-Whitney U-test. \* indicates  
1122 p<0.0001. D) (i-ii) SB supplementation in the induction medium robustly inhibits Nodal signalling. (i)  
1123 Geometrically confined hPSC colonies were treated with BMP4 for 24h. Media tested were: 'Vehicle'  
1124 indicated SR medium (see Materials and Methods for composition) supplemented with BMP4 and bFGF.  
1125 'SB' indicated vehicle supplemented with 10µM SB431542. (ii) Gene expression Nodal and Lefty-A (a  
1126 Nodal target) after 24h of treatment with either 'Vehicle' of 'SB' media. Data shown as mean ± s.d. (n=3,  
1127 technical replicates, independent wells). The p-value was calculated using two-sided Student's t-test.

1128 **Figure S11: Nodal inhibition during BMP4 treatment of hPSC colonies abrogates peri-gastrulation-**  
1129 **associated fates and induces pre-neurulation-associated fates.** A) (i-ii) Overview of experimental  
1130 setup. (i) Geometrically confined hPSC colonies were treated with BMP4 for 48h. (ii) Media tested. 'Vehicle'  
1131 indicated SR medium (see Materials and Methods for composition) supplemented with BMP4 and bFGF.  
1132 'SB' indicated vehicle supplemented with 10µM SB431542. B) (i-ii) Response of gastrulation-associated  
1133 fate patterning in Vehicle and SB conditions. (i) Representative immunofluorescent images for BRA,  
1134 GATA6, EOMES, and SOX17 for Vehicle and SB conditions. White triangle represents non-specific  
1135 background staining for EOMES. Scale bar represents 200µm. (ii) Quantified expression of gastrulation-

1136 associated fates. Each data point represents an identified colony. The total number of colonies were  
1137 (373,248), (325, 317), (81,72), and (506, 329) for BRA, GATA6, EOMES, and SOX17 respectively for  
1138 (Vehicle and SB treatments). The data are pooled from two experiments except for EOMES, which was  
1139 performed once. C) (i-ii) Pre-neurulation-like fate patterning observed in the presence of SB. (i)  
1140 Representative immunofluorescent images of TFAP2A, SIX1, OTX2, and co-stained image of SOX2, and  
1141 GATA3. Scale bar represents 200 $\mu$ m. (ii) Average radial expression intensity of the pre-neurulation-  
1142 associated fates represented as line plots. Standard deviation shown in grey, and 95% confidence intervals  
1143 shown in black.

1144 **Figure S12: SOX2 and GATA3 expression is consistent with a pSMAD1 dose-dependent fate**  
1145 **patterning.** A) Overview of experimental setup. Perturbing BMP4 dose in induction medium while  
1146 maintaining colony size varies pSMAD1 concentration levels at the colony periphery (see **Fig S9A-C** for  
1147 details). B) Percentage of cells in each identified colony expressing GATA3 when colonies of 500 $\mu$ m in  
1148 diameter were treated with varying doses of BMP4 (3.125ng/ml, 6.25ng/ml, 12.5ng/ml, and 25ng/ml) in  
1149 induction medium. Each data point represents an identified colony. The total number of colonies were 131,  
1150 208, 215, and 244 for the respective doses. Data pooled from two experiments. Bars represent mean  $\pm$  s.d.  
1151 The p-value was calculated using Kruskal-Wallis test. C) Representative immunofluorescent images of  
1152 colonies stained for SOX2 and GATA3. Scale bar represents 200 $\mu$ m. D) Overview of experimental setup.  
1153 Perturbing the colony size while maintaining the BMP4 dose constant in the induction medium varies the  
1154 pSMAD1 levels at the colony center (see **Fig. S9D-E** for details). E) Percentage of cells in each identified  
1155 colony expressing SOX2 when colonies of varying sizes (200 $\mu$ m, 300 $\mu$ m, 400 $\mu$ m, 500 $\mu$ m, 600 $\mu$ m, and  
1156 700 $\mu$ m in diameter) were treated with 25ng/ml of BMP4 in induction medium. Each data point represents  
1157 an identified colony. The total number of colonies were 932, 439, 256, 175, 122, and 45 for the respective  
1158 sizes. Data pooled from two experiments. Bars represent mean  $\pm$  s.d. The p-value was calculated using  
1159 Kruskal-Wallis test. F) Representative immunofluorescent images of colonies stained for SOX2 and  
1160 GATA3. Scale bar represents 200 $\mu$ m.

1161 **Figure S13: GATA3 expression arises as a function of BMP4 dose and induction time.** Percentage of  
1162 cells expressing SOX2, and GATA in 500 $\mu$ m colonies induced to differentiate at varying concentrations of  
1163 BMP4 (3.125 ng/ml, 6.25ng/ml, 12.5 ng/ml, and 25 ng/ml) and induction times (12 hours, 24 hours, 36  
1164 hours, and 48 hours). Each data point represents an identified colony, and each condition had over 100  
1165 colonies. Data pooled from two experiments. Bars represent mean  $\pm$  s.d.

1166 **Figure S14: Changing shapes does not affect outside-in spatial patterning.** Representative images of  
1167 various shapes of geometrically-confined hPSC colonies treated with BMP4 and SB in SR medium. Varying  
1168 colony shapes does not result in any deviation from anticipated fate patterning. The experiment was  
1169 performed once. Scale bar represents 200 $\mu$ m.

1170 **Figure S15: No spatial oscillations of pSMAD1 detected when large geometrically confined hPSC**  
1171 **colonies are treated with 50ng/ml BMP4 and SB in SR medium.** A-B) No discernable spatial oscillations  
1172 of pSMAD1 expression detected with geometrically confined hPSC colonies of 3mm diameter were treated  
1173 with 50ng/ml of BMP4 and SB for 24h in SR medium. A) Stitched images of the entire colony stained for  
1174 pSMAD1 shown in greyscale for ease of visibility. B) Enlarged fields that are indicated by white squares in  
1175 A. White arrows indicate regions that contain cells with positive pSMAD1 expression. Scale bar represents  
1176 1mm.

1177 **Figure S16: Negligible spatial oscillations of pSMAD1 detected when large geometrically confined**  
1178 **hPSC colonies are treated with 200ng/ml BMP4 and SB in SR medium.** A-B) Negligible spatial  
1179 oscillations of pSMAD1 expression detected with geometrically confined hPSC colonies of 3mm diameter  
1180 were treated with 200ng/ml of BMP4 and SB for 24h in SR medium. A) Stitched images of the entire colony

1181 stained for pSMAD1 shown in greyscale for ease of visibility. B) Enlarged fields that are indicated by white  
1182 squares in A. White arrows at the colony periphery indicate regions that contain cells with positive pSMAD1  
1183 expression. White arrows with accompanying question marks indicate regions that possibly show  
1184 expression of pSMAD1; however, the staining in these regions is inconclusive. Scale bar represents 1mm.

1185 **Figure S17: Marginal spatial oscillations of pSMAD1 detected when large geometrically confined**  
1186 **hPSC colonies are treated with 50ng/ml BMP4 and SB in N2B27 medium.** A-B) Marginal spatial  
1187 oscillations of pSMAD1 expression detected with geometrically confined hPSC colonies of 3mm diameter  
1188 were treated with 50ng/ml of BMP4 and SB for 24h in N2B27 medium. A) Stitched images of the entire  
1189 colony stained for pSMAD1 shown in greyscale for ease of visibility. B) Enlarged fields that are indicated  
1190 by white squares in A. White arrows indicate regions that contain cells with positive pSMAD1 expression.  
1191 Scale bar represents 1mm.

1192 **Figure S18: Treatment of large geometrically confined hPSC colonies with 200ng/ml BMP4 and SB**  
1193 **in N2B27 medium results in spatial oscillations of pSMAD1.** A-B) Spatial oscillations of pSMAD1  
1194 expression detected with geometrically confined hPSC colonies of 3mm diameter were treated with  
1195 200ng/ml of BMP4 and SB for 24h in N2B27 medium. A) Stitched images of the entire colony stained for  
1196 pSMAD1 shown in greyscale for ease of visibility. B) Enlarged fields that are indicated by white squares in  
1197 A. White arrows indicate regions that contain cells with positive pSMAD1 expression. Scale bar represents  
1198 1mm.

1199 **Figure S19: Additional replicates of immunofluorescent images demonstrating oscillatory pSMAD1**  
1200 **expression in the center of large geometrically confined hPSC colonies treated with 200ng/ml BMP4**  
1201 **and SB in N2B27 medium.** Additional representative images of 3mm diameter geometrically confined  
1202 hPSC colonies treated with 200ng/ml BMP4 and SB in N2B27 medium for 24h and stained for pSMAD1.  
1203 Zoomed-in images of fields contained within white squares shown adjacent to the stitched images. White  
1204 arrows indicate regions that contain cells with positive pSMAD1 expression. Scale bar represents 1mm.

1205 **Figure S20: No spatial oscillations of pre-neurulation-like fates detected when large geometrically**  
1206 **confined hPSC colonies are treated with 200ng/ml BMP4 and SB in SR medium.** A-B) Treatment of  
1207 geometrically confined-hPSC colonies with 200ng/ml of BMP4 and SB for 48h results in RD-like periodic  
1208 spatial oscillations of SOX2 and GATA3 expression. i) Representative stitched images of 3mm diameter  
1209 hPSC colonies differentiated with 200ng/ml of BMP4 for 48h. Scale bar represents 1mm. ii) Zoomed section  
1210 outlined by the white square in (i). The experiment was repeated two times.

1211 **Figure S21: Minor spatial oscillations of pre-neurulation-like fates detected when large**  
1212 **geometrically confined hPSC colonies are treated with 50ng/ml BMP4 and SB in N2B27 medium.** A-  
1213 B) Treatment of geometrically confined-hPSC colonies with 200ng/ml of BMP4 and SB for 48h results in  
1214 RD-like periodic spatial oscillations of SOX2 and GATA3 expression. i) Representative stitched images of  
1215 3mm diameter hPSC colonies differentiated with 200ng/ml of BMP4 for 48h. Scale bar represents 1mm. ii)  
1216 Zoomed section outlined by the white square in (i). The experiment was repeated two times.

1217 **Figure S22: RD-like spatial oscillations of pre-neurulation-like fates detected when large**  
1218 **geometrically confined hPSC colonies are treated with 200ng/ml BMP4 and SB in N2B27 medium.**  
1219 Representative immunofluorescent images of geometrically confined hPSC colonies of 3mm diameter  
1220 stained for SOX2, and GATA3. The colonies were treated with 200ng/ml of BMP4 and SB for 48h. Scale  
1221 bar represents 1mm.

1222 **Sup. Table 1: Human PSC lines utilized in this study:** Complete list of hPSC lines used for the study;  
1223 and the culture conditions employed for their maintenance.

1224 **Sup. Table 2: List of primers used in this study**

1225 **Sup. Table 3: List of antibodies used in this study**

1226

## 1227 References

- 1228 1. Hertig AT, Rock J, Adams EC. A description of 34 human ova within the first 17 days of  
1229 development. *Am J Anat.* 1956;98(3):435–93.
- 1230 2. Tam PPL, Loebel DAF. Gene function in mouse embryogenesis: get set for gastrulation. *Nat Rev*  
1231 *Genet.* 2007;8(5):368–81.
- 1232 3. Tam PPL, Loebel DAF, Tanaka SS. Building the mouse gastrula: signals, asymmetry and  
1233 lineages. *Curr Opin Genet Dev.* 2006 Aug;16(4):419–25.
- 1234 4. Rossant J, Tam PPL. Emerging Asymmetry and Embryonic Patterning in Early Mouse  
1235 Development. *Dev Cell.* 2004;7:155–64.
- 1236 5. Nikolopoulou E, Galea GL, Rolo A, Greene NDE, Copp AJ. Neural tube closure: cellular,  
1237 molecular and biomechanical mechanisms. *Development [Internet].* 2017;144(4):552–66.  
1238 Available from: <http://dev.biologists.org/lookup/doi/10.1242/dev.145904>
- 1239 6. Greene NDE, Copp AJ. Neural Tube Defects. *Annu Rev Neurosci [Internet].* 2014;37(1):221–42.  
1240 Available from: <http://www.annualreviews.org/doi/10.1146/annurev-neuro-062012-170354>
- 1241 7. Greene NDE, Copp AJ. Development of the vertebrate central nervous system: formation of the  
1242 neural tube. *Prenat Diagn.* 2009;29:303–11.
- 1243 8. Groves AK, LaBonne C. Setting appropriate boundaries: Fate, patterning and competence at the  
1244 neural plate border. *Dev Biol [Internet].* 2014;389(1):39–49. Available from:  
1245 <http://dx.doi.org/10.1016/j.ydbio.2013.11.027>
- 1246 9. Simões-costa M, Bronner ME. Insights into neural crest development and evolution from genomic  
1247 analysis Insights into neural crest development and evolution from genomic analysis. 2013;1069–  
1248 80.
- 1249 10. Tewary M, Zandstra P. Mechanics-guided developmental fate patterning. *Nat Mater.*  
1250 2018;17(July):571–2.
- 1251 11. Turing A. The chemical basis of morphogenesis. *Bull Math Biol.* 1952;237(641):153–97.
- 1252 12. Gierer A, Meinhardt H. A theory of biological pattern formation. *Kybernetik.* 1972;12(1):30–9.
- 1253 13. Green JB a, Sharpe J. Positional information and reaction-diffusion: two big ideas in  
1254 developmental biology combine. *Development.* 2015;142(7):1203–11.
- 1255 14. Marcon L, Diego X, Sharpe J, Müller P. High-throughput mathematical analysis identifies turing  
1256 networks for patterning with equally diffusing signals. *Elife.* 2016;5(APRIL2016):1–60.
- 1257 15. Wolpert L. Positional information and the spatial pattern of cellular differentiation. *J Theor Biol.*  
1258 1969;25(1):1–47.
- 1259 16. Wolpert L. Positional information and pattern formation. *Phil Trans R Soc Lond B.* 1981;295:441–  
1260 450.
- 1261 17. Dessaud E, Yang LL, Hill K, Cox B, Ulloa F, Ribeiro A, et al. Interpretation of the sonic hedgehog

- 1262 morphogen gradient by a temporal adaptation mechanism. *Nature*. 2007;450(7170):717–20.
- 1263 18. Dessaud E, McMahon AP, Briscoe J. Pattern formation in the vertebrate neural tube: a sonic  
1264 hedgehog morphogen-regulated transcriptional network. *Development*. 2008;135(15):2489–503.
- 1265 19. Deglincerti A, Croft GF, Pietila LN, Zernicka-Goetz M, Siggia ED, Brivanlou AH. Self-organization  
1266 of the in vitro attached human embryo. *Nature*. 2016;533(7602):251–4.
- 1267 20. Shahbazi MN, Jedrusik A, Vuoristo S, Recher G, Hupalowska A, Bolton V, et al. Self-organization  
1268 of the human embryo in the absence of maternal tissues. *Nat Cell Biol*. 2016;(February).
- 1269 21. Belle M, Godefroy D, Couly G, Malone SA, Collier F, Giacobini P, et al. Tridimensional  
1270 Visualization and Analysis of Early Human Development. *Cell*. 2017;169(1):161–173.e12.
- 1271 22. Kretzschmar K, Clevers H. Organoids: Modeling Development and the Stem Cell Niche in a Dish.  
1272 *Dev Cell* [Internet]. 2016;38(6):590–600. Available from:  
1273 <http://dx.doi.org/10.1016/j.devcel.2016.08.014>
- 1274 23. Lancaster M a, Renner M, Martin C, Wenzel D, Bicknell LS, Hurles ME, et al. Cerebral organoids  
1275 model human brain development and microcephaly. *Nature* [Internet]. 2012;501(1):373–9.  
1276 Available from:  
1277 <http://www.ncbi.nlm.nih.gov/pubmed/22813947%5Cnhttp://www.ncbi.nlm.nih.gov/pubmed/23940280%5Cnhttp://www.ncbi.nlm.nih.gov/pubmed/22704498%5Cnhttp://www.pubmedcentral.nih.gov/articlerender.fcgi?artid=3899231&tool=pmcentrez&rendertype=abstract%5Cnhttp://www.ncbi.nlm.nih.gov/pubmed/22813947>
- 1280 24. Tewary M, Ostblom J, Prochazka L, Zulueta-Coarasa T, Shakiba N, Fernandez-Gonzalez R, et al.  
1281 A stepwise model of Reaction-Diffusion and Positional-Information governs self-organized human  
1282 peri-gastrulation-like patterning. *Development* [Internet]. 2017;dev.149658. Available from:  
1283 <http://dev.biologists.org/lookup/doi/10.1242/dev.149658>
- 1284 25. Warmflash A, Sorre B, Etoc F, Siggia ED, Brivanlou AH. A method to recapitulate early embryonic  
1285 spatial patterning in human embryonic stem cells. *Nat Methods*. 2014 Jun 29;11(8):847–54.
- 1286 26. Etoc F, Metzger J, Ruzo A, Kirst C, Yoney A, Ozair MZ, et al. A Balance between Secreted  
1287 Inhibitors and Edge Sensing Controls Gastruloid Self-Organization. *Dev Cell*. 2016;39(3):302–15.
- 1288 27. Xue X, Sun Y, Resto-Irizarry AM, Yuan Y, Aw Yong KM, Zheng Y, et al. Mechanics-guided  
1289 embryonic patterning of neuroectoderm tissue from human pluripotent stem cells. *Nat Mater*  
1290 [Internet]. 2018;17(July):1–9. Available from: <http://dx.doi.org/10.1038/s41563-018-0082-9>
- 1291 28. Ortmann D, Vallier L. Variability of human pluripotent stem cell lines. *Curr Opin Genet Dev*  
1292 [Internet]. 2017;46:179–85. Available from:  
1293 <http://linkinghub.elsevier.com/retrieve/pii/S0959437X16301861>
- 1294 29. Keller A, Dziedzicka D, Zambelli F, Markouli C, Sermon K, Spits C, et al. Genetic and epigenetic  
1295 factors which modulate differentiation propensity in human pluripotent stem cells. *Hum Reprod*  
1296 Update [Internet]. 2018;(February):1–14. Available from:  
1297 <http://academic.oup.com/humupd/advance-article/doi/10.1093/humupd/dmx042/4825062>
- 1298 30. Nazareth EJP, Ostblom JEE, Lückner PB, Shukla S, Alvarez MM, Oh SKW, et al. High-throughput  
1299 fingerprinting of human pluripotent stem cell fate responses and lineage bias. *Nat Methods*. 2013  
1300 Oct 20;10(12):1225–31.
- 1301 31. Lensch MW, Schlaeger TM, Zon LI, Daley GQ. Teratoma Formation Assays with Human  
1302 Embryonic Stem Cells: A Rationale for One Type of Human-Animal Chimera. *Cell Stem Cell*.  
1303 2007;1(3):253–8.
- 1304 32. Tsankov AM, Akopian V, Pop R, Chetty S, Gifford CA, Daheron L, et al. A qPCR ScoreCard

- 1305 quantifies the differentiation potential of human pluripotent stem cells. *Nat Biotechnol* [Internet].  
1306 2015;33(11):1182–92. Available from: <http://www.nature.com/doi/10.1038/nbt.3387>
- 1307 33. Müller F-J, Schuldt BM, Williams R, Mason D, Altun G, Papapetrou EP, et al. A bioinformatic  
1308 assay for pluripotency in human cells. *Nat Methods* [Internet]. 2011;8(4):315–7. Available from:  
1309 <http://www.nature.com/doi/10.1038/nmeth.1580>
- 1310 34. Peerani R, Bauwens C, Kumacheva E, Zandstra PW. *Stem Cells in Regenerative Medicine*. Audet  
1311 J, Stanford WL, editors. 2009 [cited 2013 Nov 7];482:21–33. Available from:  
1312 <http://www.springerlink.com/index/10.1007/978-1-59745-060-7>
- 1313 35. Bauwens CL, Peerani R, Niebruegge S, Woodhouse K a, Kumacheva E, Husain M, et al. Control  
1314 of human embryonic stem cell colony and aggregate size heterogeneity influences differentiation  
1315 trajectories. *Stem Cells*. 2008 Sep;26(9):2300–10.
- 1316 36. Tewary M, Shakiba N, Zandstra PW. Stem cell bioengineering: building from stem cell biology. *Nat*  
1317 *Rev Genet* [Internet]. 2018; Available from: <http://www.nature.com/articles/s41576-018-0040-z>
- 1318 37. Whitesides GM, Ostuni E, Takayama S, Jiang X, Ingber DE. Soft lithography in biology and  
1319 biochemistry. *Annu Rev Biomed Eng* [Internet]. 2001 Jan;3:335–73. Available from:  
1320 <http://www.ncbi.nlm.nih.gov/pubmed/11447067>
- 1321 38. Kane RS, Takayama S, Ostuni E, Ingber DE, Whitesides GM. Patterning proteins and cells using  
1322 soft lithography. *Biomaterials* [Internet]. 1999 Dec;20(23–24):2363–76. Available from:  
1323 <http://www.ncbi.nlm.nih.gov/pubmed/10614942>
- 1324 39. Khademhosseini A, Suh KY, Jon S, Eng G, Yeh J, Chen G, et al. A Softlithographic Approach To  
1325 Fabricate Patterned Microfluidic Channels. *Anal Chem*. 2004;76(13):5783–9.
- 1326 40. Azioune A, Storch M, Bornens M, Théry M, Piel M. Simple and rapid process for single cell micro-  
1327 patterning. *Lab Chip*. 2009 Jun 7;9(11):1640–2.
- 1328 41. Azioune A, Carpi N, Tseng Q, Théry M, Piel M. Chapter 8 – Protein Micropatterns: A Direct  
1329 Printing Protocol Using Deep UVs. In: *Methods in Cell Biology* [Internet]. 2010. p. 133–46.  
1330 Available from: <http://linkinghub.elsevier.com/retrieve/pii/S0091679X10970088>
- 1331 42. Knop K, Hoogenboom R, Fischer D, Schubert US. Poly(ethylene glycol) in drug delivery: Pros and  
1332 cons as well as potential alternatives. *Angew Chemie - Int Ed*. 2010;49(36):6288–308.
- 1333 43. Hermanson GT. Zero-Length Crosslinkers. *Bioconjugate Tech* [Internet]. 2013;259–73. Available  
1334 from: <http://linkinghub.elsevier.com/retrieve/pii/B9780123822390000042>
- 1335 44. Rödiger S, Ruhland M, Schmidt C, Schröder C, Grossmann K, Böhm A, et al. Fluorescence dye  
1336 adsorption assay to quantify carboxyl groups on the surface of poly(methyl methacrylate)  
1337 microbeads. *Anal Chem*. 2011;83(9):3379–85.
- 1338 45. Théry M. Micropatterning as a tool to decipher cell morphogenesis and functions. *J Cell Sci*  
1339 [Internet]. 2010 Dec 15 [cited 2013 Nov 7];123(Pt 24):4201–13. Available from:  
1340 <http://www.ncbi.nlm.nih.gov/pubmed/21123618>
- 1341 46. Watt FM, Huck WTS. Role of the extracellular matrix in regulating stem cell fate. *Nat Rev Mol Cell*  
1342 *Biol* [Internet]. 2013;14(8):467–73. Available from: <http://dx.doi.org/10.1038/nrm3620>
- 1343 47. Kojima Y, Kaufman-Francis K, Studdert JB, Steiner K a., Power MD, Loebel D a F, et al. The  
1344 transcriptional and functional properties of mouse epiblast stem cells resemble the anterior  
1345 primitive streak. *Cell Stem Cell*. 2014;14(1):107–20.
- 1346 48. Funa NS, Schachter KA, Lerdrup M, Ekberg J, Hess K, Dietrich N, et al.  $\beta$ -Catenin Regulates

- 1347 Primitive Streak Induction through Collaborative Interactions with SMAD2/SMAD3 and OCT4. *Cell*  
1348 *Stem Cell*. 2015;16(6):639–652.
- 1349 49. Hart AH, Hartley L, Sourris K, Stadler ES, Li R, Stanley EG, et al. Mixl1 is required for axial  
1350 mesendoderm morphogenesis and patterning in the murine embryo. *Development* [Internet].  
1351 2002;129(15):3597–608. Available from: <http://www.ncbi.nlm.nih.gov/pubmed/12117810>
- 1352 50. Bjornson CRR, Griffin KJP, Farr GH, Terashima A, Himeda C, Kikuchi Y, et al. Eomesodermin is a  
1353 localized maternal determinant required for endoderm induction in zebrafish. *Dev Cell*.  
1354 2005;9(4):523–33.
- 1355 51. Teo AKK, Arnold SJ, Trotter MWB, Brown S, Ang LT, Chng Z, et al. Pluripotency factors regulate  
1356 definitive endoderm specification through eomesodermin. *Genes Dev*. 2011;25(3):238–50.
- 1357 52. Mulloy B, Rider CC. *The Bone Morphogenetic Proteins and Their Antagonists* [Internet]. 1st ed.  
1358 Vol. 99, Vitamins and Hormones. Elsevier Inc.; 2015. 63-90 p. Available from:  
1359 <http://dx.doi.org/10.1016/bs.vh.2015.06.004>
- 1360 53. Plouhinec JL, Medina-Ruiz S, Borday C, Bernard E, Vert JP, Eisen MB, et al. A molecular atlas of  
1361 the developing ectoderm defines neural, neural crest, placode, and nonneural progenitor identity in  
1362 vertebrates. Vol. 15, *PLoS Biology*. 2017. 1-44 p.
- 1363 54. Simoes-Costa M, Bronner ME. Establishing neural crest identity: a gene regulatory recipe.  
1364 *Development* [Internet]. 2015;142(2):242–57. Available from:  
1365 <http://dev.biologists.org/cgi/doi/10.1242/dev.105445>
- 1366 55. Pieper M, Ahrens K, Rink E, Peter A, Schlosser G. Differential distribution of competence for  
1367 panplacodal and neural crest induction to non-neural and neural ectoderm. *Development*  
1368 [Internet]. 2012;139(6):1175–87. Available from:  
1369 <http://dev.biologists.org/cgi/doi/10.1242/dev.074468>
- 1370 56. Briscoe J, Small S. Morphogen rules: design principles of gradient-mediated embryo patterning.  
1371 *Development*. 2015;142(23):3996–4009.
- 1372 57. Garcia-Gonzalo FR, Belmonte JCI. Albumin-associated lipids regulate human embryonic stem cell  
1373 self-renewal. *PLoS One*. 2008;3(1):1–10.
- 1374 58. Blauwkamp T a, Nigam S, Ardehali R, Weissman IL, Nusse R. Endogenous Wnt signalling in  
1375 human embryonic stem cells generates an equilibrium of distinct lineage-specified progenitors. *Nat*  
1376 *Commun*. 2012 Jan;3:1070.
- 1377 59. Lancaster MA, Corsini NS, Wolfinger S, Gustafson EH, Phillips AW, Burkard TR, et al. Guided  
1378 self-organization and cortical plate formation in human brain organoids. *Nat Biotechnol*.  
1379 2017;35(7):659–66.
- 1380 60. Harrison SE, Sozen B, Christodoulou N, Kyprianou C, Zernicka-Goetz M. Assembly of embryonic  
1381 and extraembryonic stem cells to mimic embryogenesis in vitro. *Science* (80- ) [Internet].  
1382 2017;356(6334):eaal1810. Available from:  
1383 <http://www.sciencemag.org/lookup/doi/10.1126/science.aal1810>
- 1384 61. Eiraku M, Takata N, Ishibashi H, Kawada M, Sakakura E, Okuda S, et al. Self-organizing optic-cup  
1385 morphogenesis in three-dimensional culture. *Nature* [Internet]. 2011;472(7341):51–6. Available  
1386 from: <http://www.ncbi.nlm.nih.gov/pubmed/21475194>
- 1387 62. Gjorevski N, Sachs N, Manfrin A, Giger S, Bragina ME, Ordóñez-Morán P, et al. Designer  
1388 matrices for intestinal stem cell and organoid culture. *Nature* [Internet]. 2016;539(7630):560–4.  
1389 Available from: <http://www.nature.com/doi/10.1038/nature20168>

- 1390 63. Sato T, Vries RG, Snippert HJ, van de Wetering M, Barker N, Stange DE, et al. Single Lgr5 stem  
1391 cells build crypt-villus structures in vitro without a mesenchymal niche. *Nature* [Internet].  
1392 2009;459(7244):262–5. Available from: <http://www.ncbi.nlm.nih.gov/pubmed/19329995>
- 1393 64. Turner DA, Girgin M, Alonso-Crisostomo L, Trivedi V, Baillie-Johnson P, Glodowski CR, et al.  
1394 Anteroposterior polarity and elongation in the absence of extraembryonic tissues and spatially  
1395 localised signalling in *Gastruloids*, mammalian embryonic organoids [Internet]. *Development*.  
1396 2017. dev. 150391. Available from: <http://dev.biologists.org/lookup/doi/10.1242/dev.150391>
- 1397 65. Lancaster MA, Knoblich JA. Organogenesis in a dish: Modeling development and disease using  
1398 organoid technologies. *Science* (80- ). 2014;345(6194).
- 1399 66. Morgani SM, Metzger JJ, Nichols J, Siggia ED, Hadjantonakis A-K. Micropattern differentiation of  
1400 mouse pluripotent stem cells recapitulates embryo regionalized fates and patterning. 2017;1–35.  
1401 Available from: <http://dx.doi.org/10.1101/236562>
- 1402 67. Blin G, Picart C, Thery M, Puceat M. Geometrical confinement guides Brachyury self-patterning in  
1403 embryonic stem cells. *BioRxiv*. 2017;
- 1404 68. Robinton DA, Daley GQ. The promise of induced pluripotent stem cells in research and therapy.  
1405 *Nature* [Internet]. 2012;481(7381):295–305. Available from:  
1406 <http://www.nature.com/doi/10.1038/nature10761>
- 1407 69. Muller P, Rogers KW, Jordan BM, Lee JS, Robson D, Ramanathan S, et al. Differential Diffusivity  
1408 of Nodal and Lefty Underlies a Reaction-Diffusion Patterning System. *Science* (80- ).  
1409 2012;336(6082):721–4.
- 1410 70. Rogers KW, Lord ND, Gagnon JA, Pauli A, Zimmerman S, Aksel DC, et al. Nodal patterning  
1411 without lefty inhibitory feedback is functional but fragile. *Elife*. 2017;6:1–20.
- 1412 71. Siggia ED, Warmflash A. Modeling mammalian gastrulation with embryonic stem cells. 2017;  
1413 Available from: <http://arxiv.org/abs/1712.03335>
- 1414 72. Gurdon JB. A community effect in animal development. *Nature* [Internet]. 1988;336(6201):772–4.  
1415 Available from: <http://www.nature.com/doi/10.1038/336772a0>
- 1416 73. Voiculescu O, Bodenstern L, Jun IL, Stern CD. Local cell interactions and self-amplifying individual  
1417 cell ingression drive amniote gastrulation. *Elife*. 2014;2014(3):1–26.
- 1418 74. Findlay SD, Postovit L-M. Comprehensive characterization of transcript diversity at the human  
1419 NODAL locus. *BioRxiv*. 2018;1–26.
- 1420 75. Oginuma M, Moncuquet P, Xiong F, Karoly E, Chal J, Guevorkian K, et al. A Gradient of Glycolytic  
1421 Activity Coordinates FGF and Wnt Signaling during Elongation of the Body Axis in Amniote  
1422 Embryos. *Dev Cell*. 2017;40(4):342–353.e10.
- 1423 76. Gouti M, Tsakiridis A, Wymeersch FJ, Huang Y, Kleinjung J, Wilson V, et al. In Vitro Generation of  
1424 Neuromesodermal Progenitors Reveals Distinct Roles for Wnt Signalling in the Specification of  
1425 Spinal Cord and Paraxial Mesoderm Identity. 2014;12(8).
- 1426 77. Turner DA, Hayward PC, Baillie-johnson P, Rue P, Broome R, Faunes F. Wnt /  $\beta$ -catenin and  
1427 FGF signalling direct the specification and maintenance of a neuromesodermal axial progenitor in  
1428 ensembles of mouse embryonic stem cells. *Development*. 2014;4243–53.
- 1429 78. Liu Z, Hui Y, Shi L, Chen Z, Xu X, Chi L, et al. Efficient CRISPR/Cas9-Mediated Versatile,  
1430 Predictable, and Donor-Free Gene Knockout in Human Pluripotent Stem Cells. *Stem Cell Reports*  
1431 [Internet]. 2016;7(3):496–507. Available from: <http://dx.doi.org/10.1016/j.stemcr.2016.07.021>



- 1432 79. Doench JG, Fusi N, Sullender M, Hegde M, Vaimberg EW, Donovan KF, et al. Optimized sgRNA  
1433 design to maximize activity and minimize off-target effects of CRISPR-Cas9. *Nat Biotechnol*  
1434 [Internet]. 2016;34(2):184–91. Available from: <http://dx.doi.org/10.1038/nbt.3437>
- 1435 80. Guschin DY, Waite AJ, Katibah GE, Miller JC, Holmes MC, Rebar EJ. A Rapid and General Assay  
1436 for Monitoring Endogenous Gene Modificatio. *Methods Mol Biol* [Internet]. 2010;649:247–56.  
1437 Available from: <http://link.springer.com/10.1007/978-1-60761-753-2>
- 1438 81. Brinkman EK, Chen T, Amendola M, Van Steensel B. Easy quantitative assessment of genome  
1439 editing by sequence trace decomposition. *Nucleic Acids Res*. 2014;42(22):1–8.
- 1440 82. Nostro MC, Sarangi F, Yang C, Holland A, Elefanty AG, Stanley EG, et al. Efficient generation of  
1441 NKX6-1+ pancreatic progenitors from multiple human pluripotent stem cell lines. *Stem Cell*  
1442 *Reports* [Internet]. 2015;4(4):591–604. Available from:  
1443 <http://dx.doi.org/10.1016/j.stemcr.2015.02.017>
- 1444

**Fig. 1**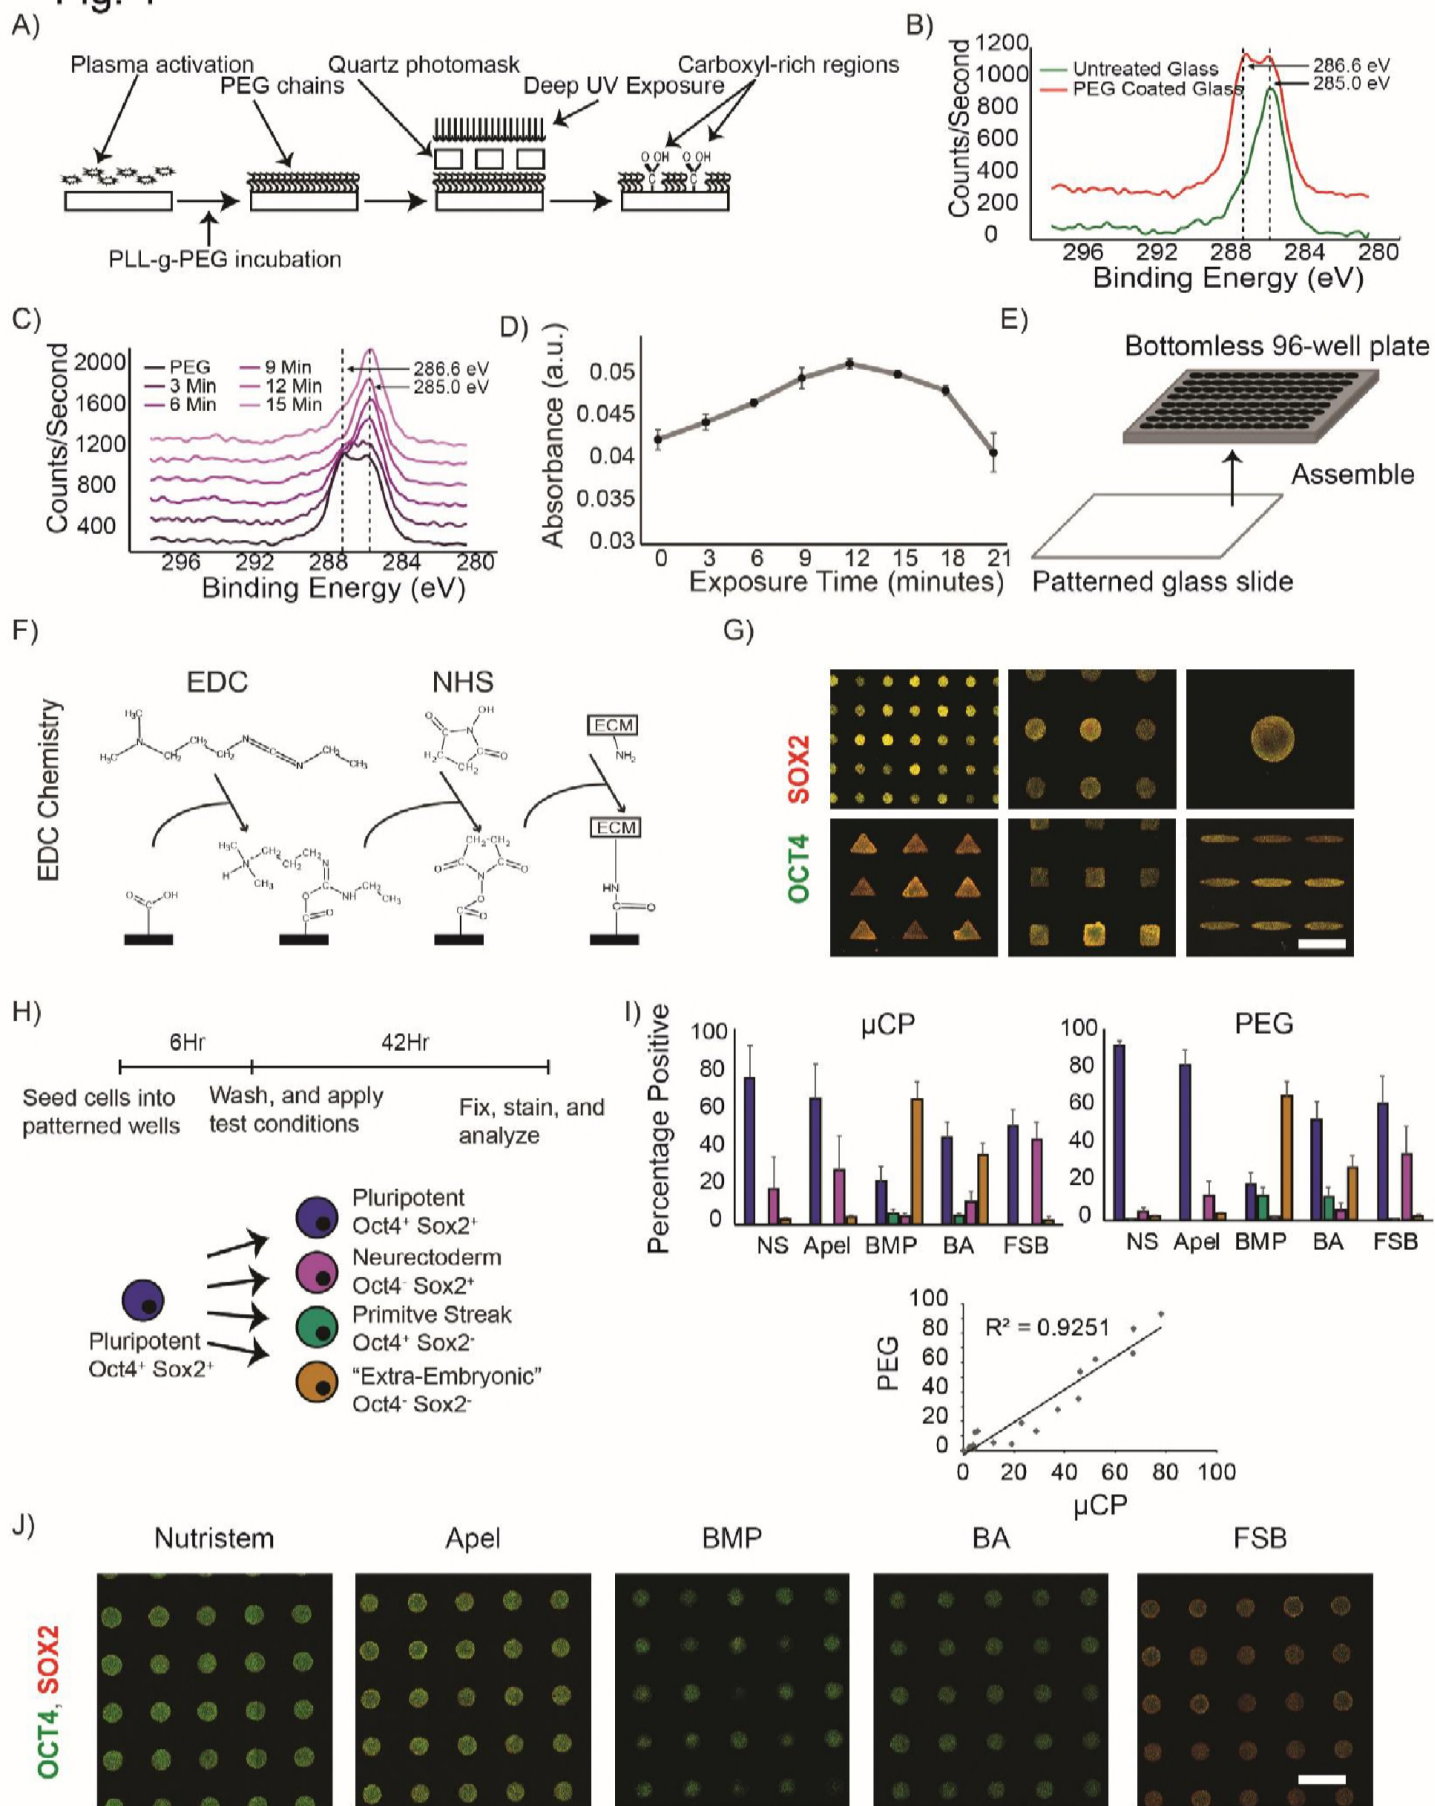

Fig. 2

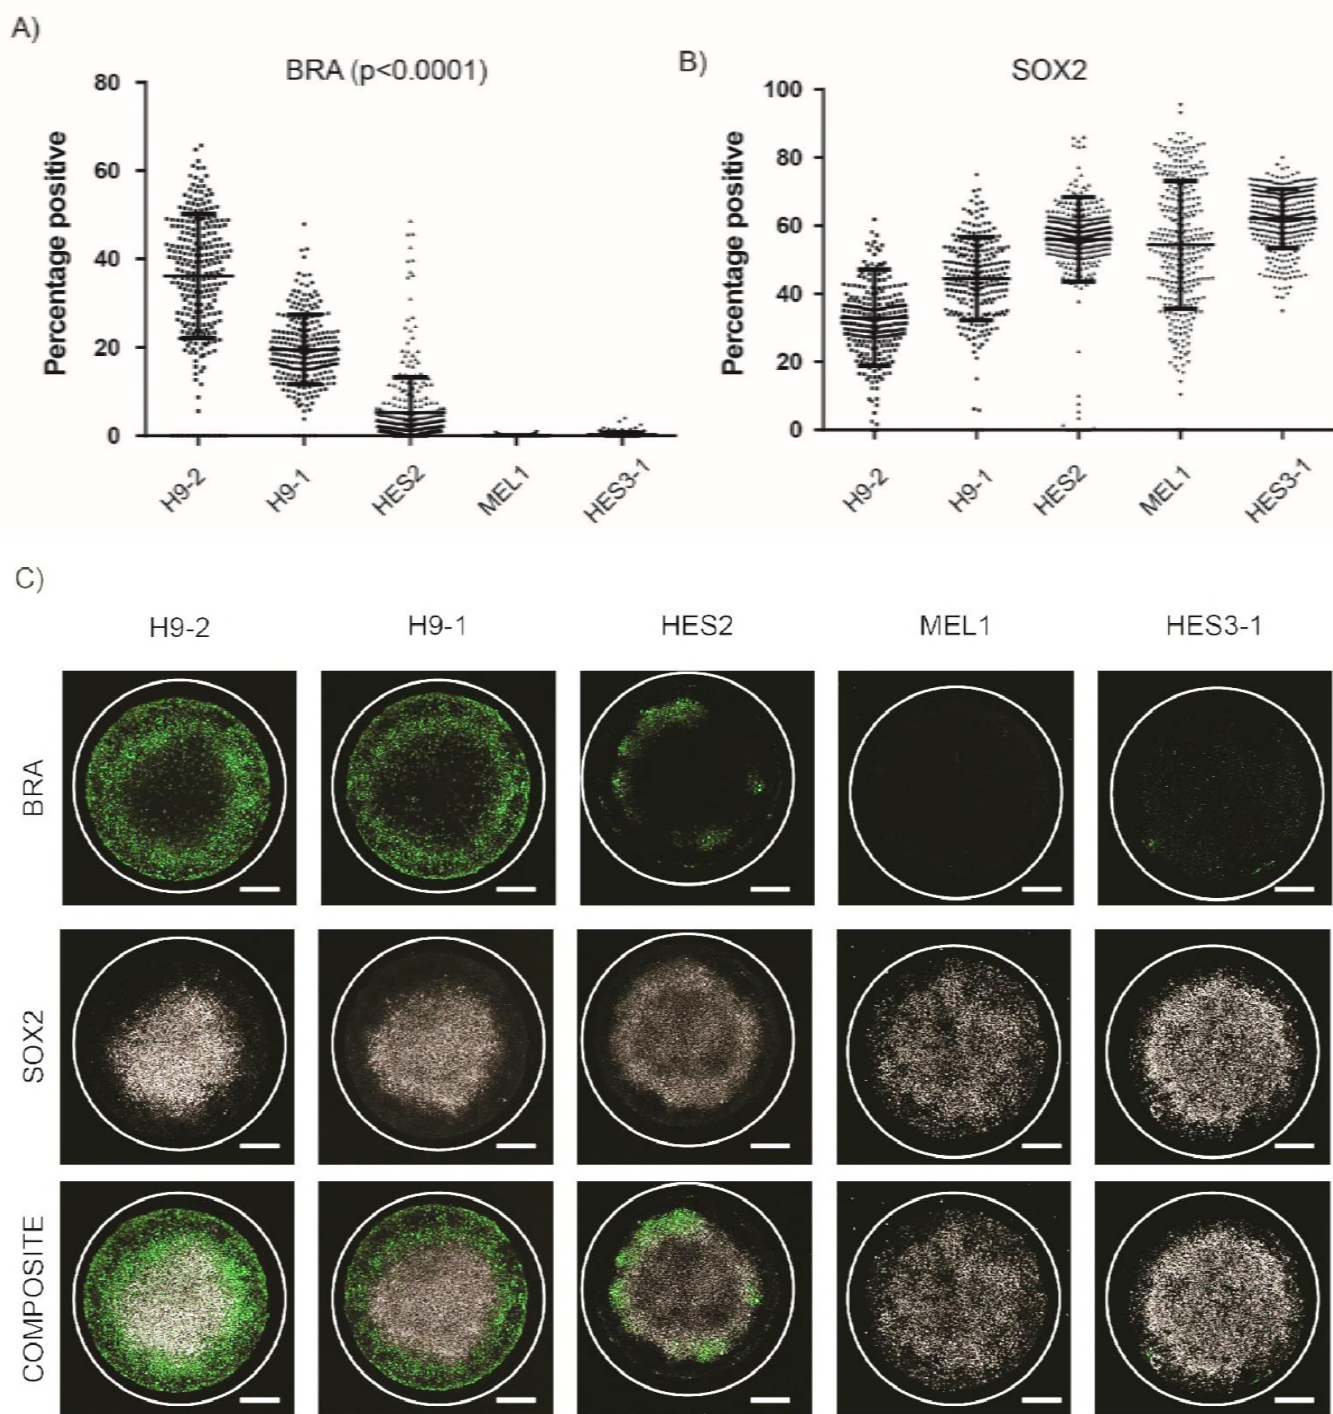

**Fig. 3**

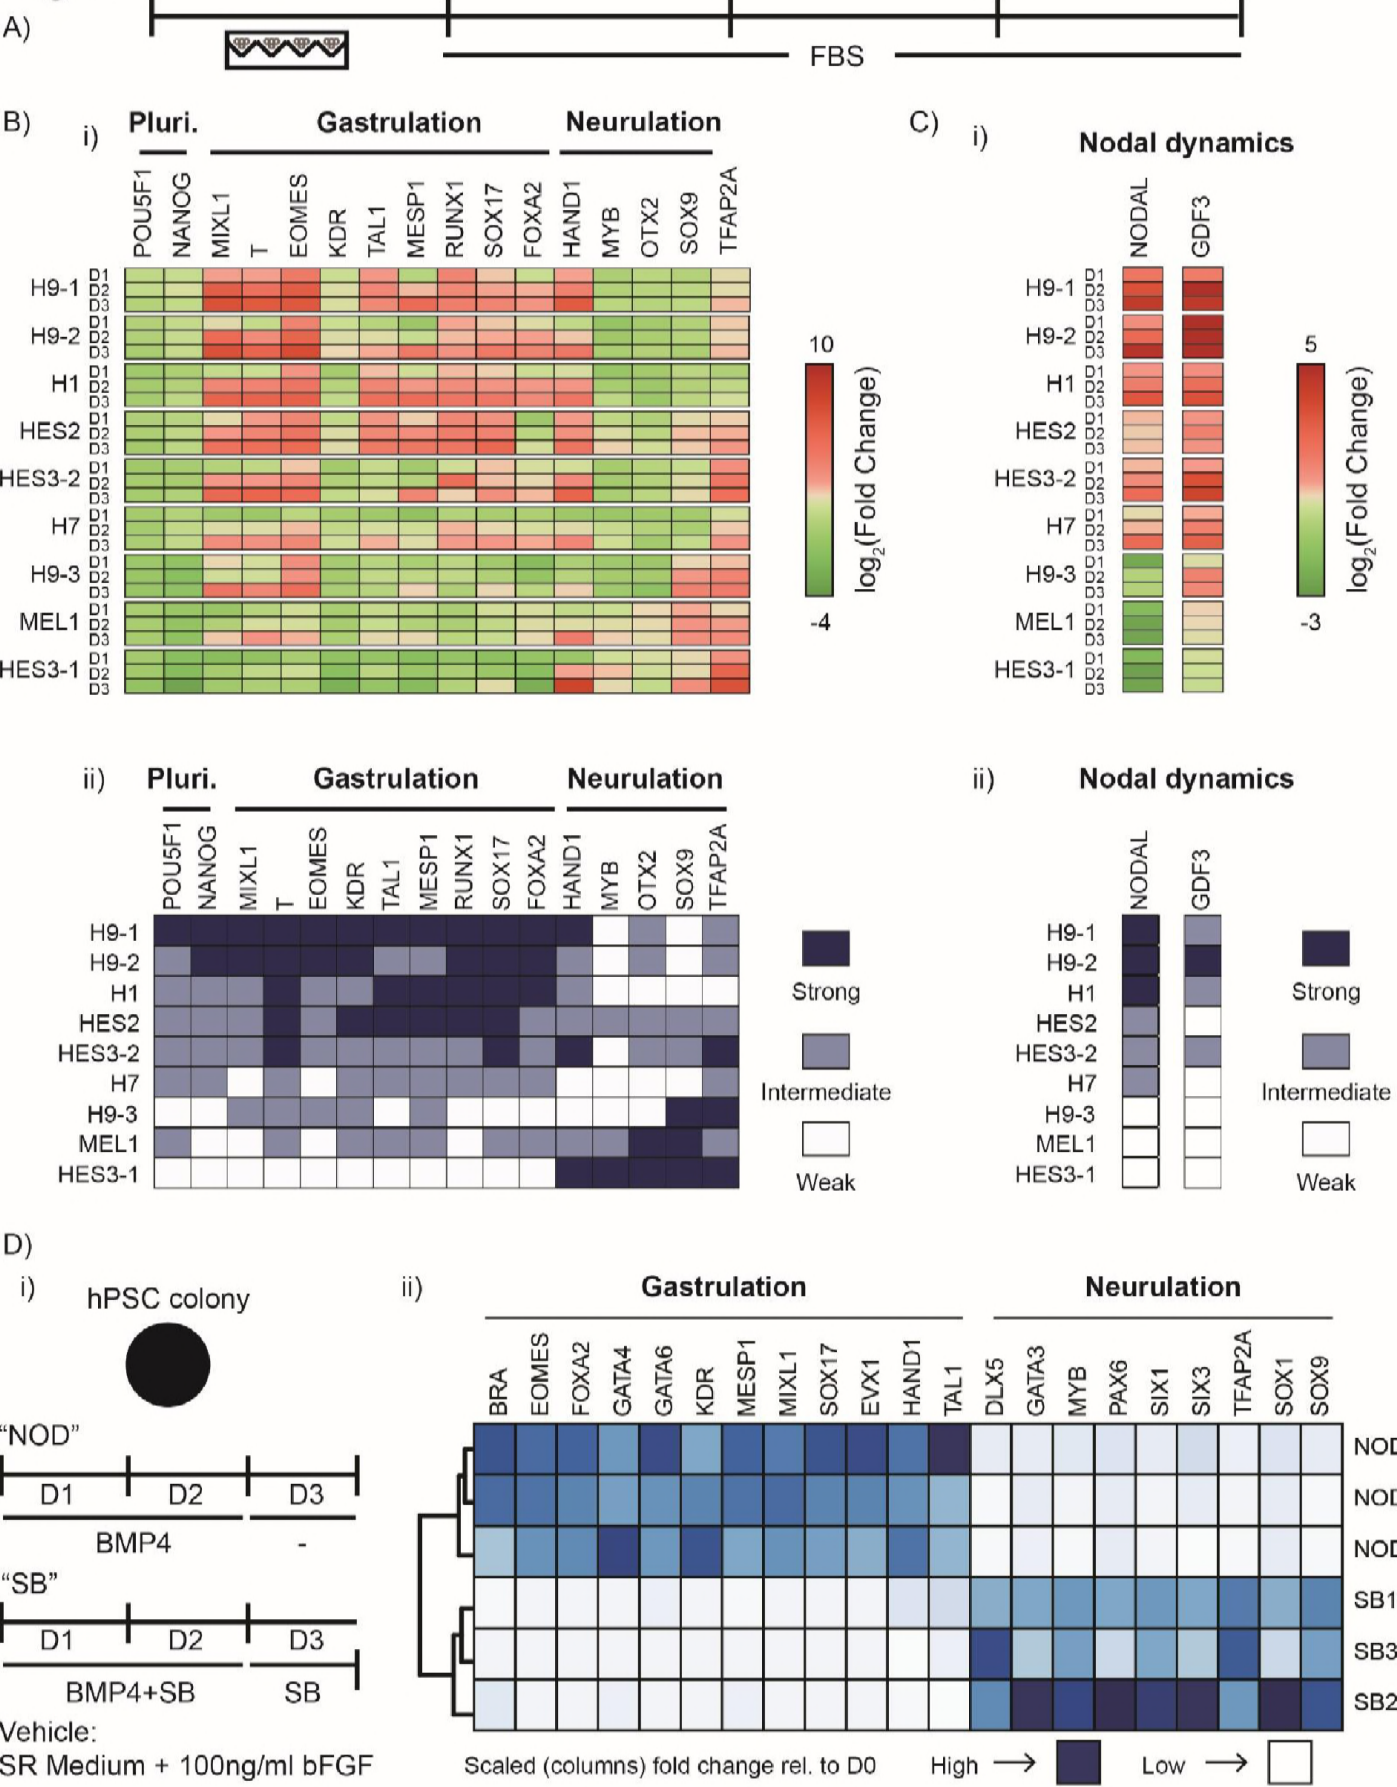

**Fig. 4**

**A)**

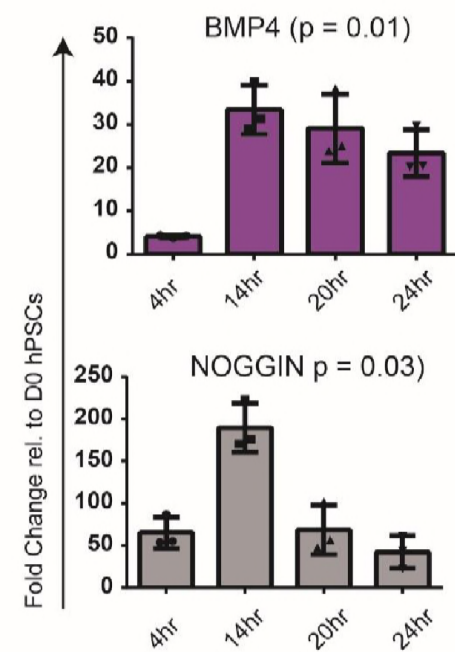

**B)**

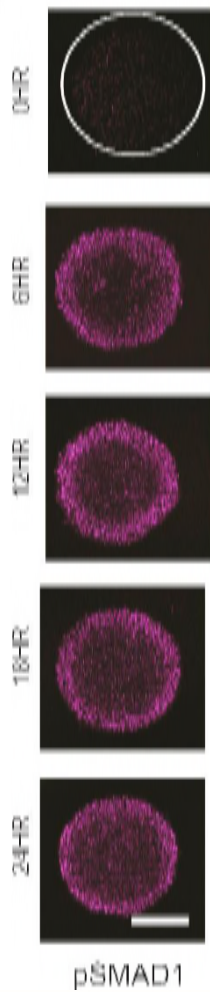

**C)**

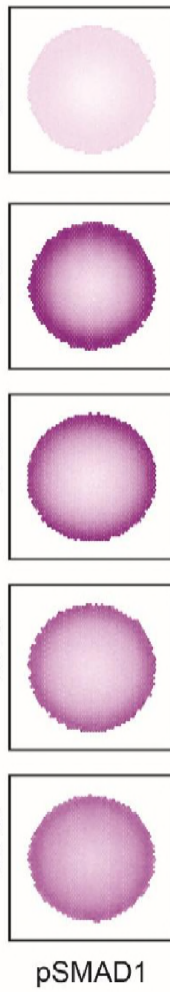

pSMAD1 intensity (a.u.)

**D)**

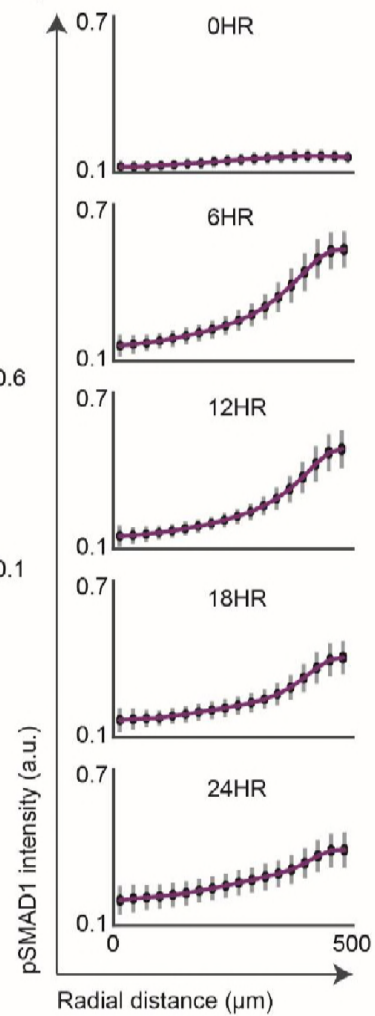

**E)**

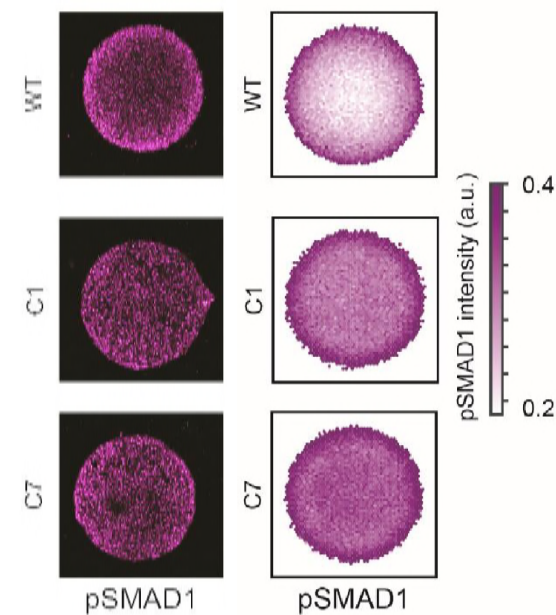

**F)**

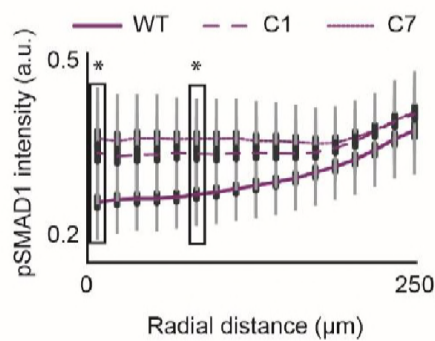

**G)**

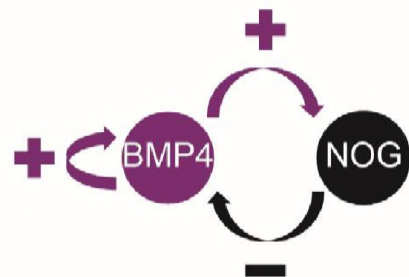

**Fig. 5**

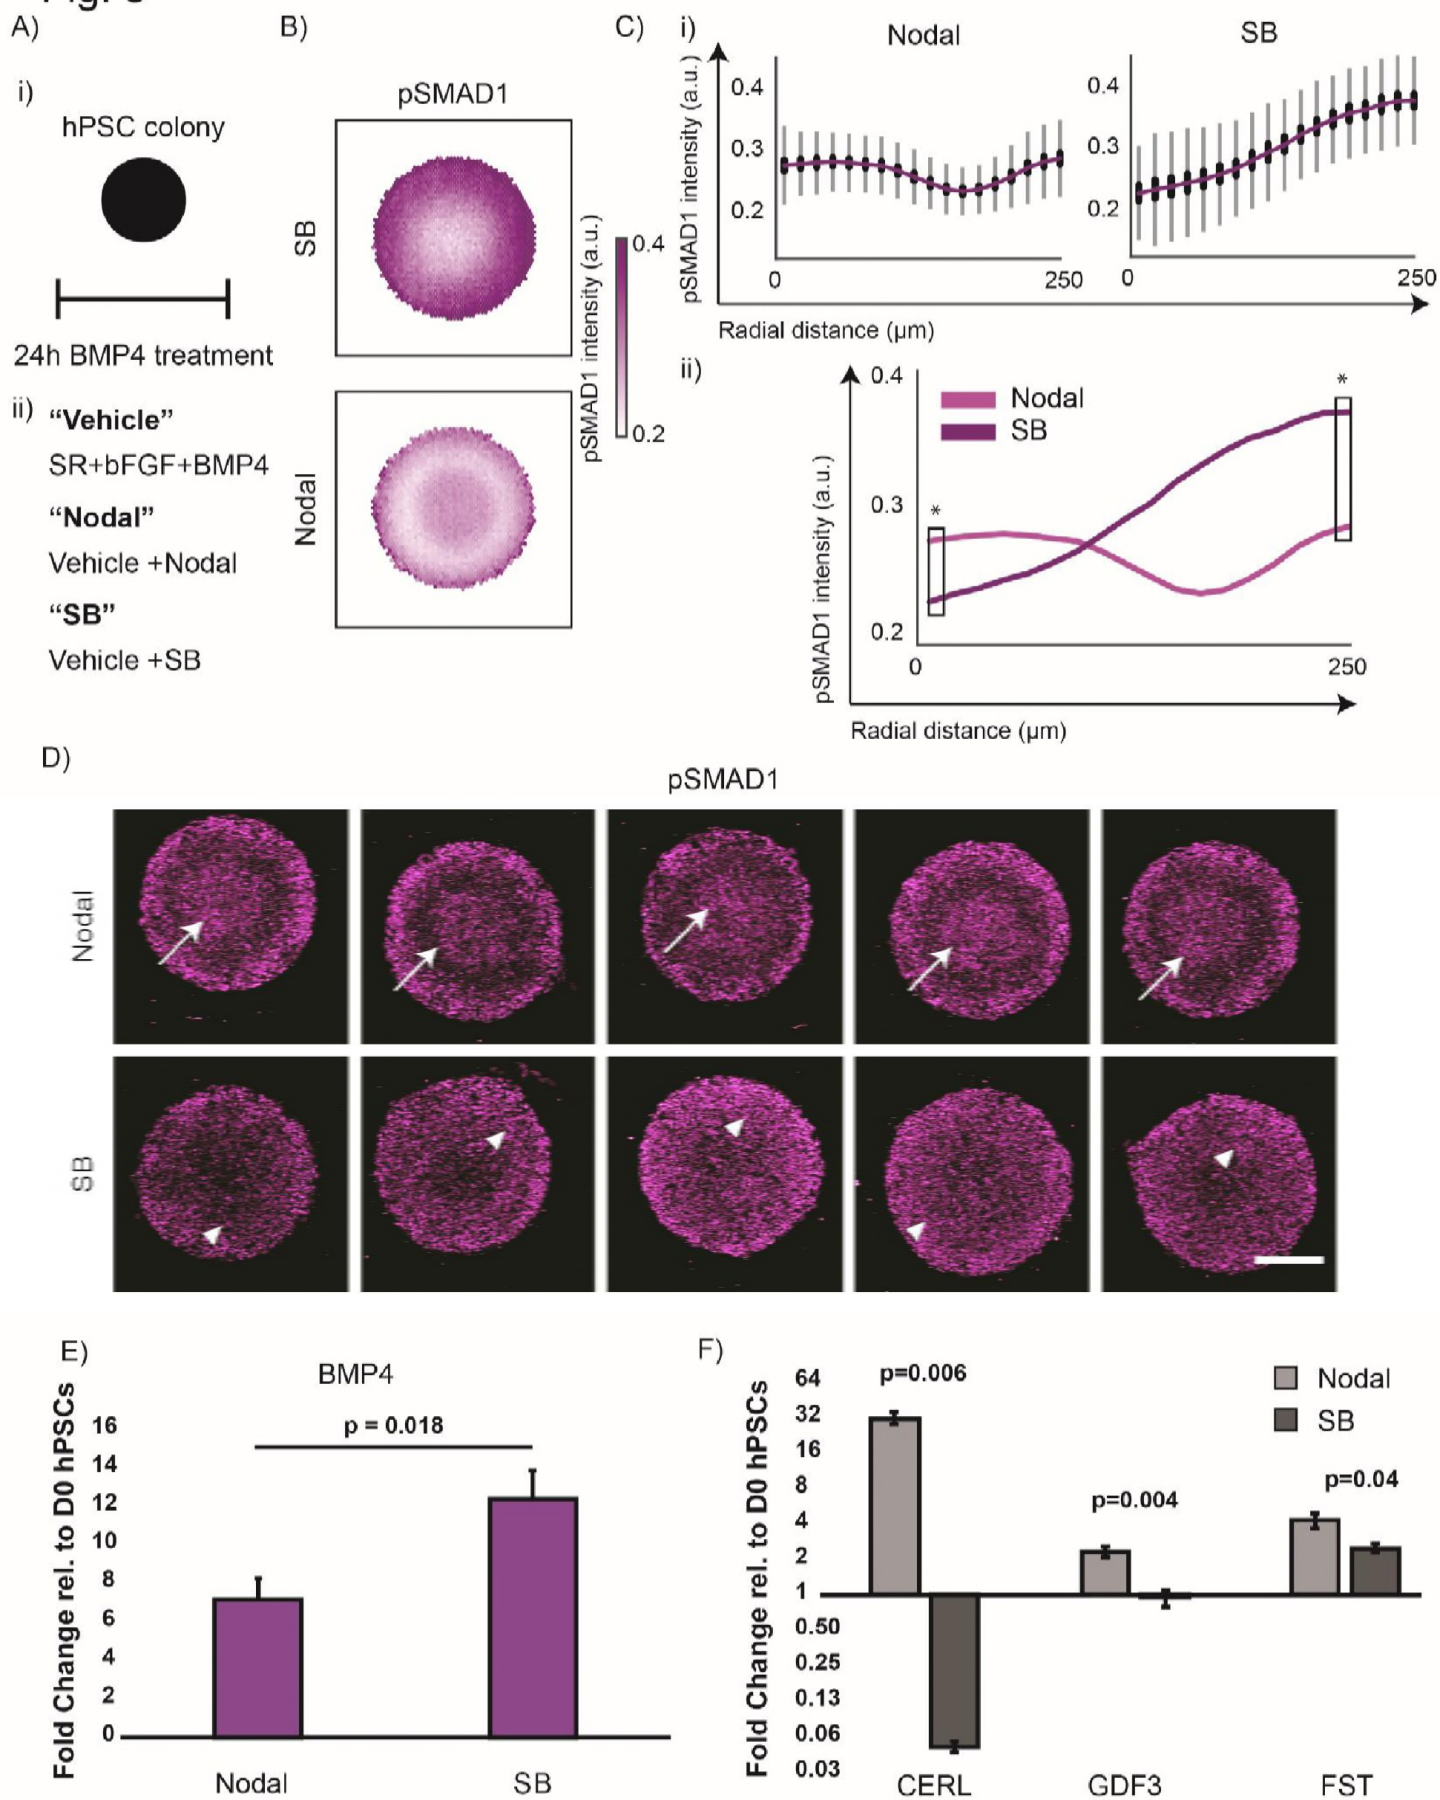

Fig. 6

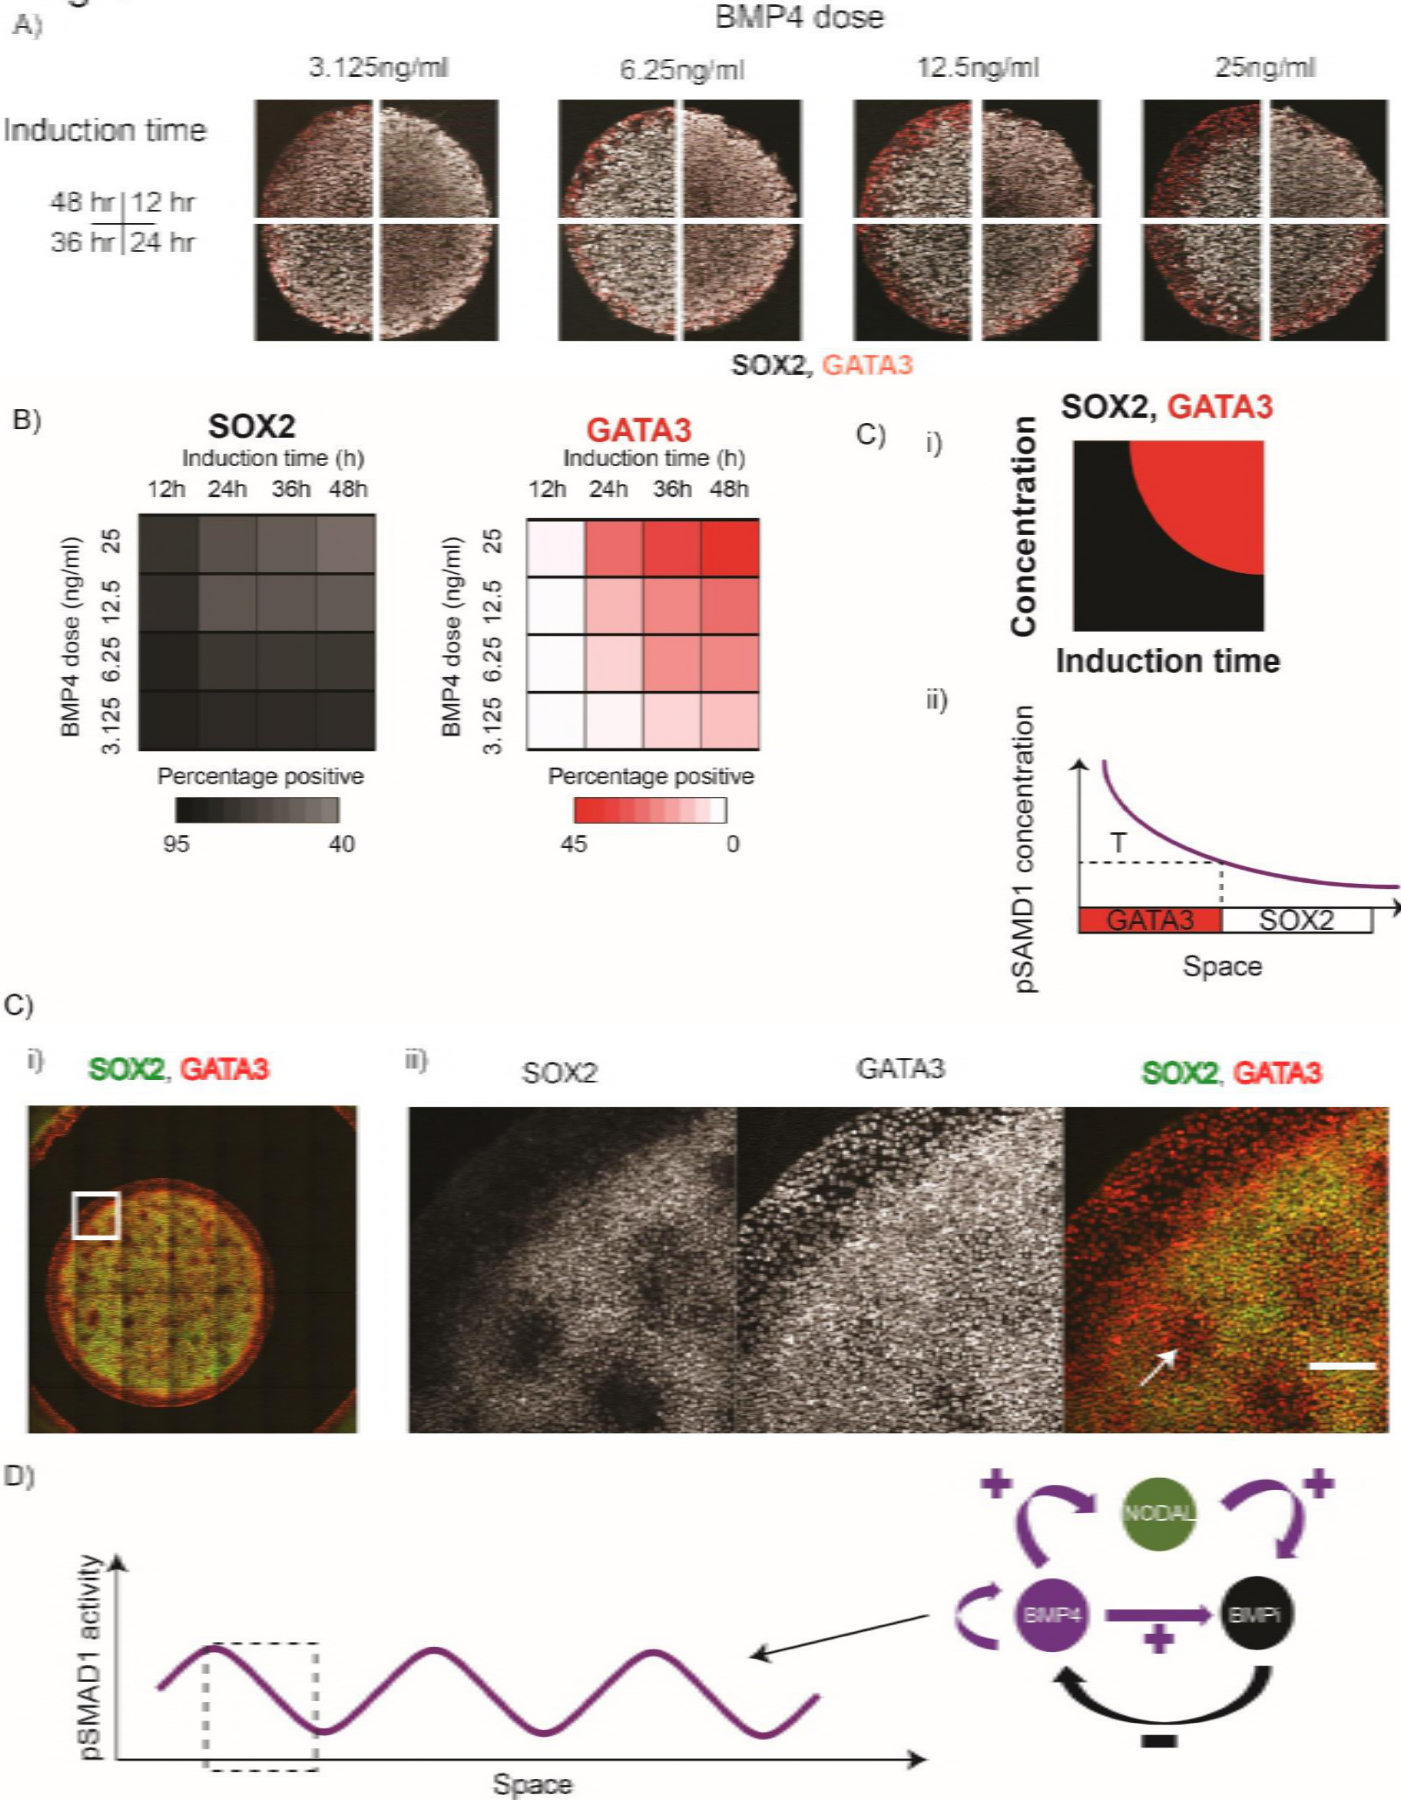

Fig. 7

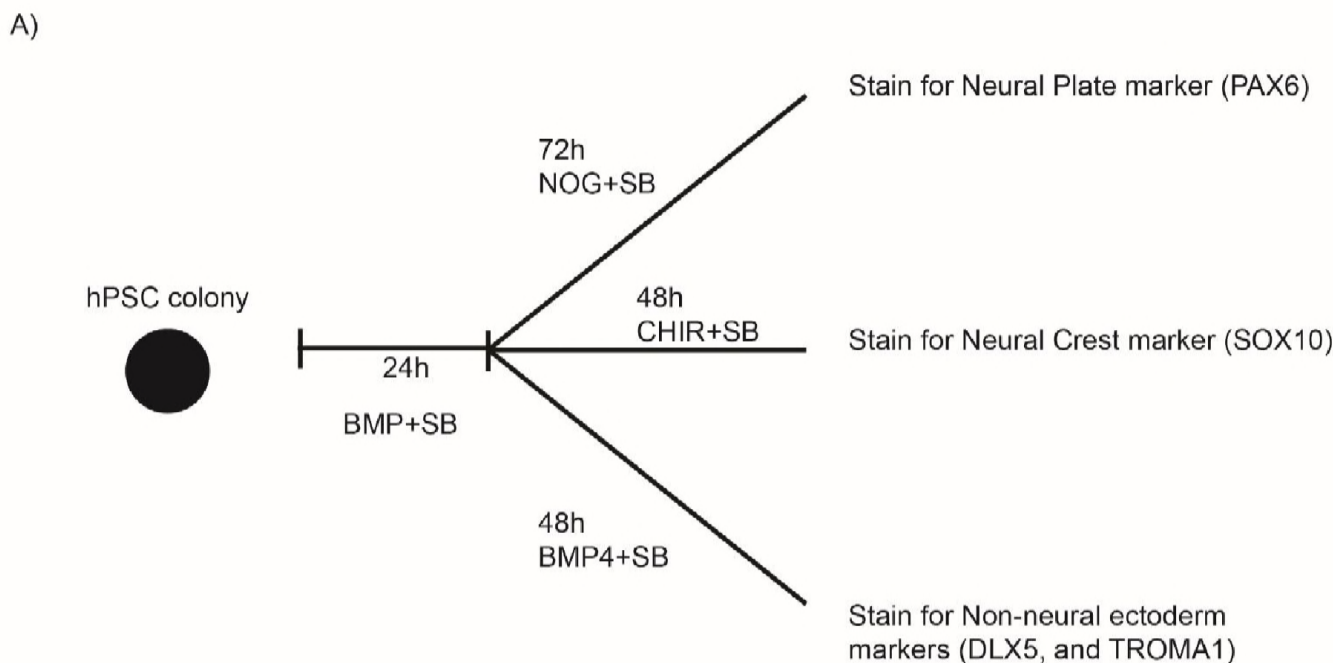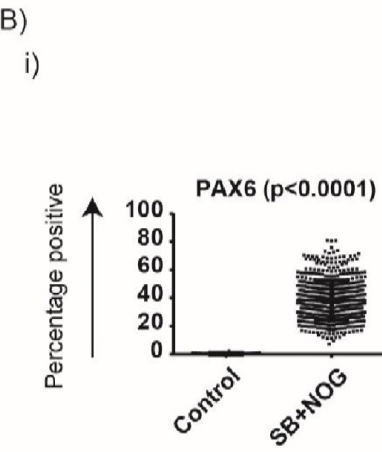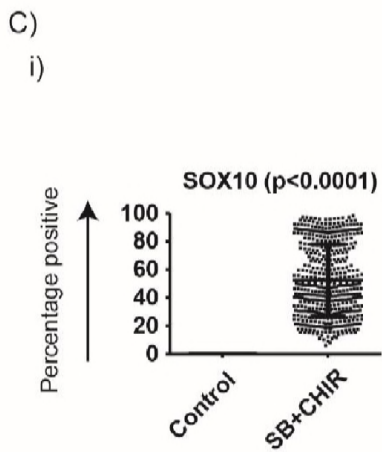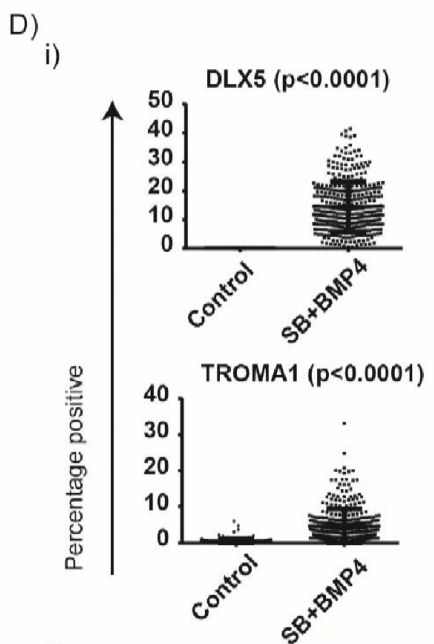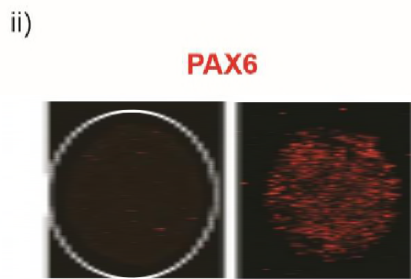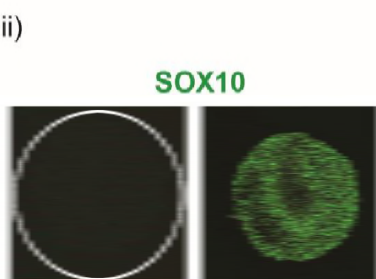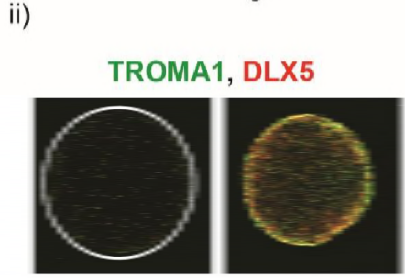



Fig. 8

A)

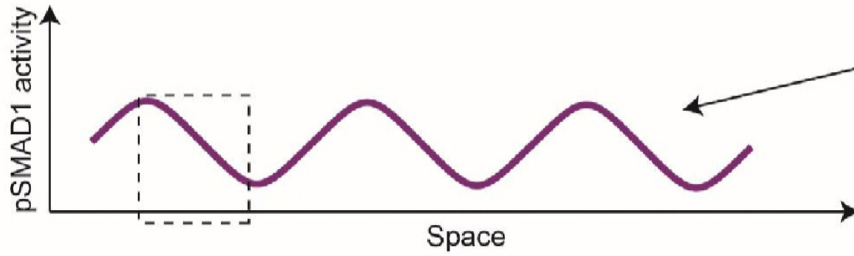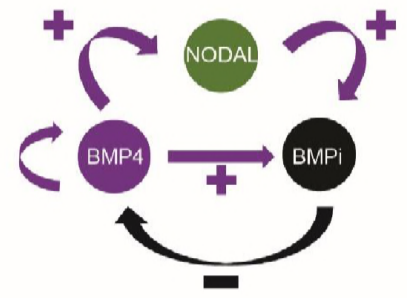

B)

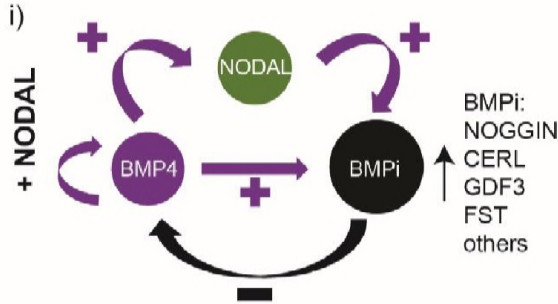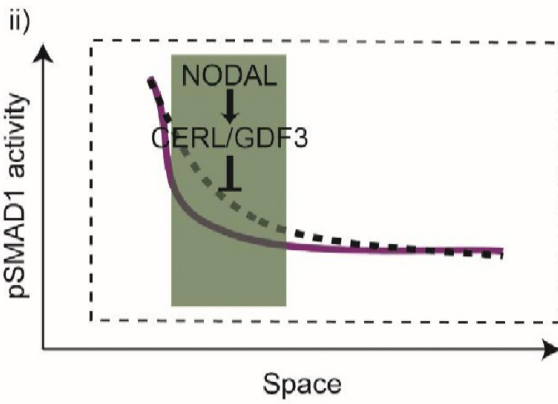

C)

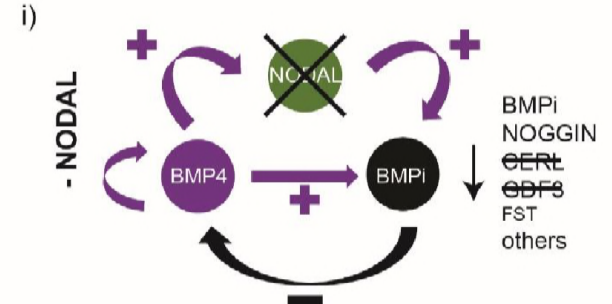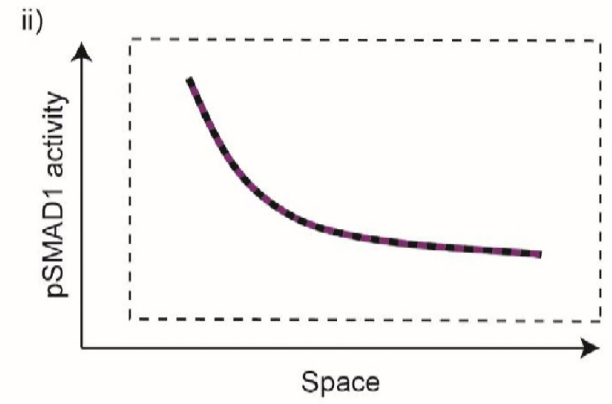

D)

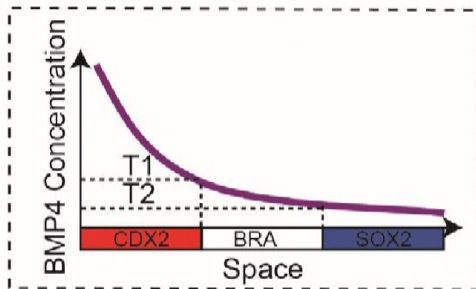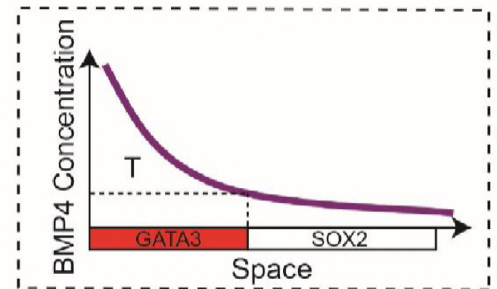

# Sup. Fig. 1

A)

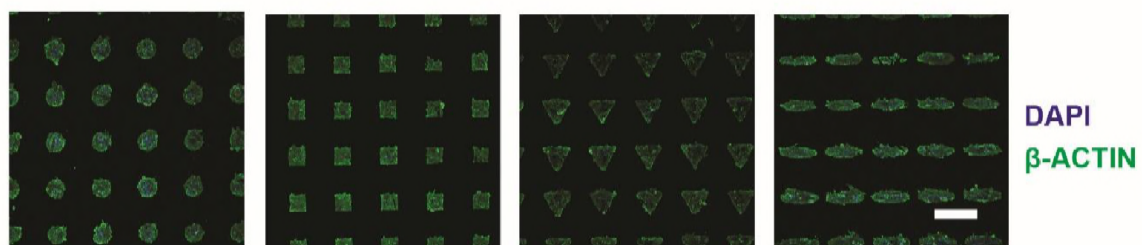

B)

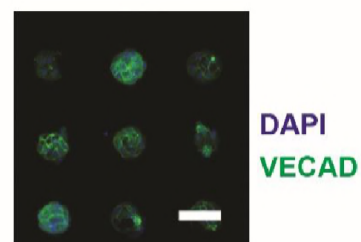

C)

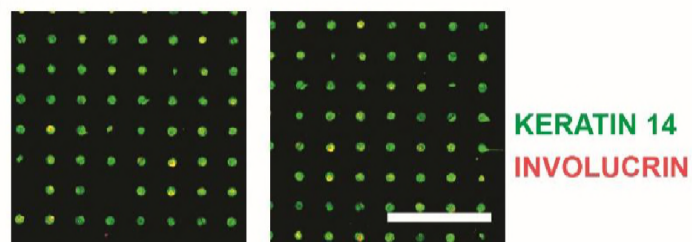

D)

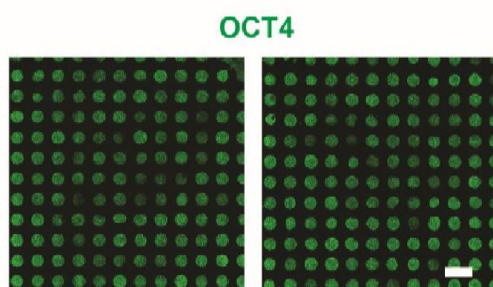

E)

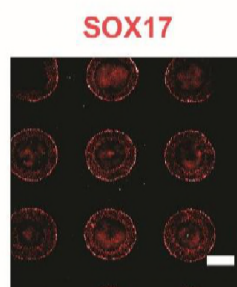

F)

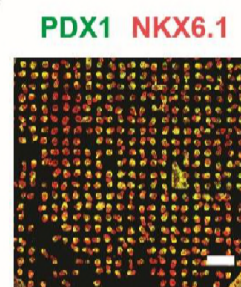

G)

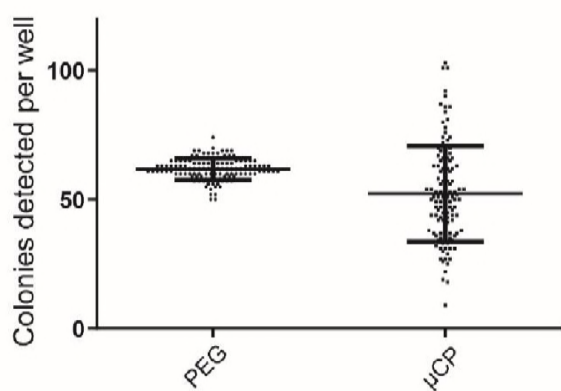

H)

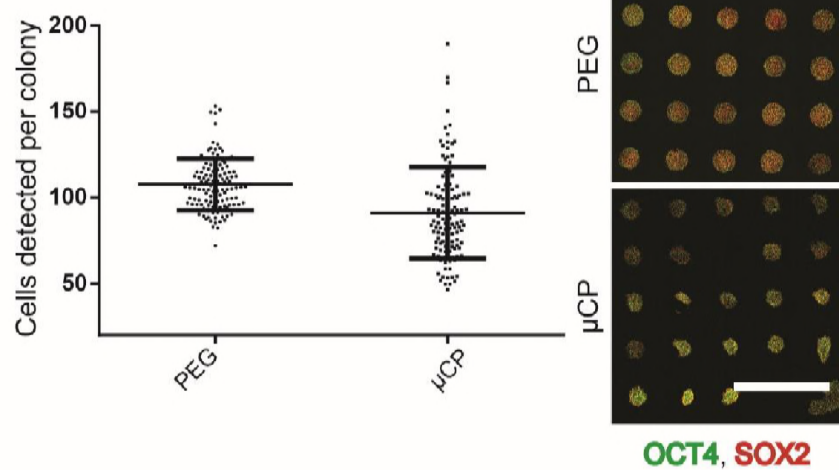

# Sup. Fig. 2

Secondary Only

OCT4+SOX2

Secondary Only

NANOG

Replicate 1

Replicate 2

Replicate 1

Replicate 2

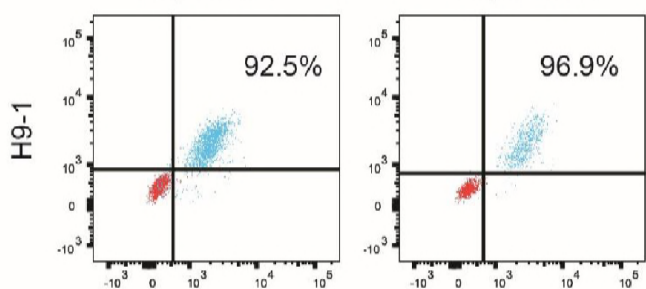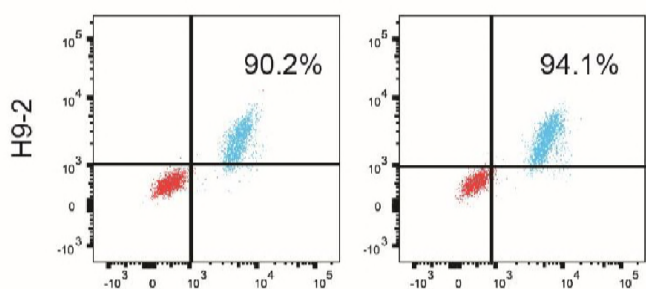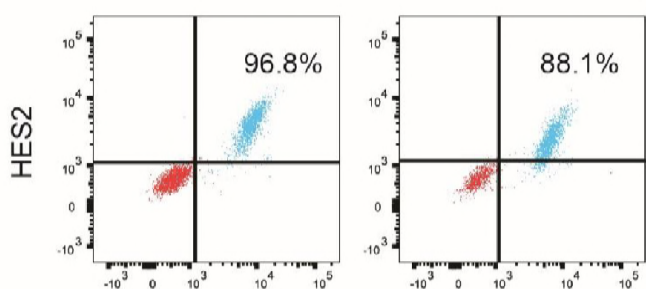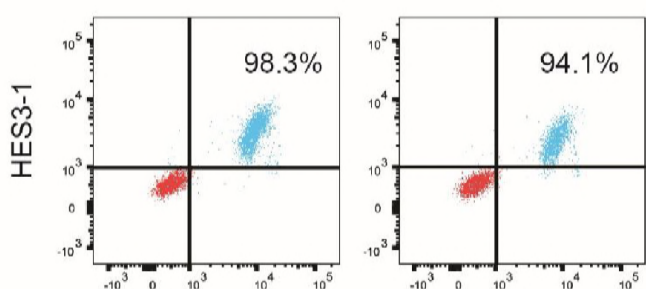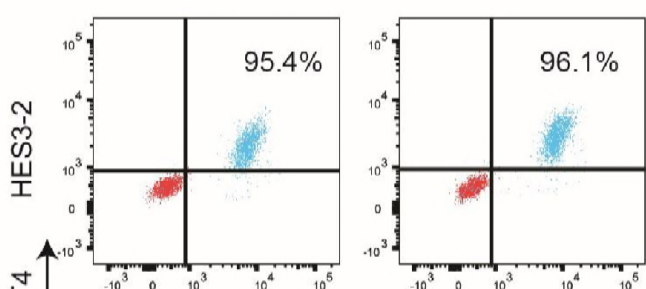

OCT4  
SOX2

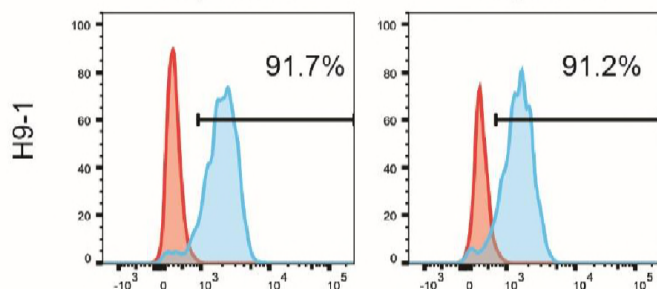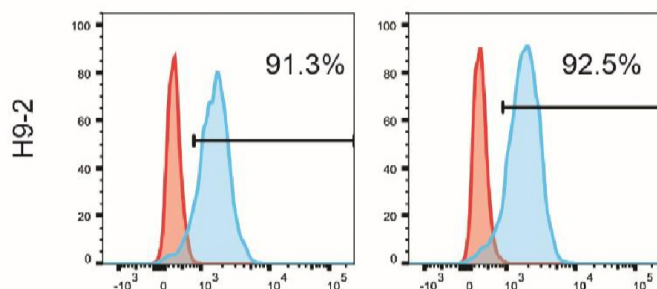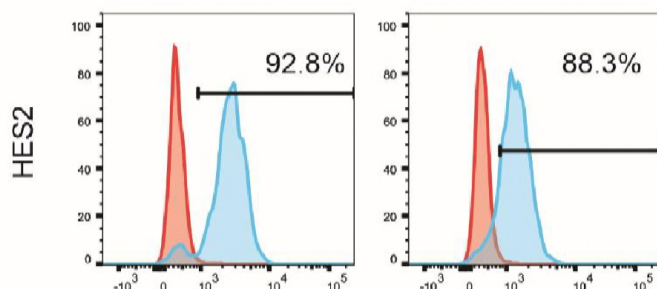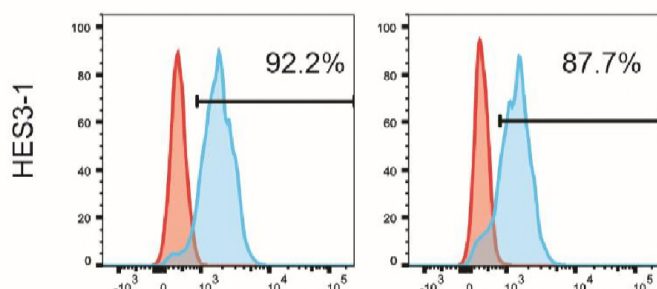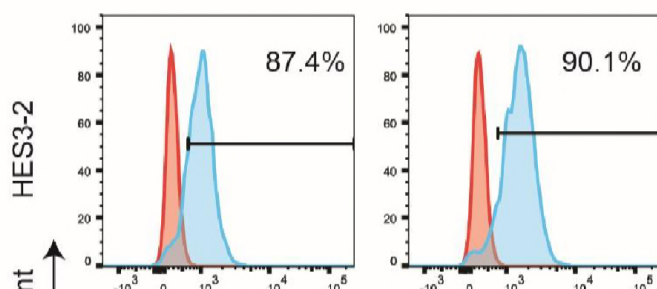

Count  
NANOG

Sup. Fig. 3

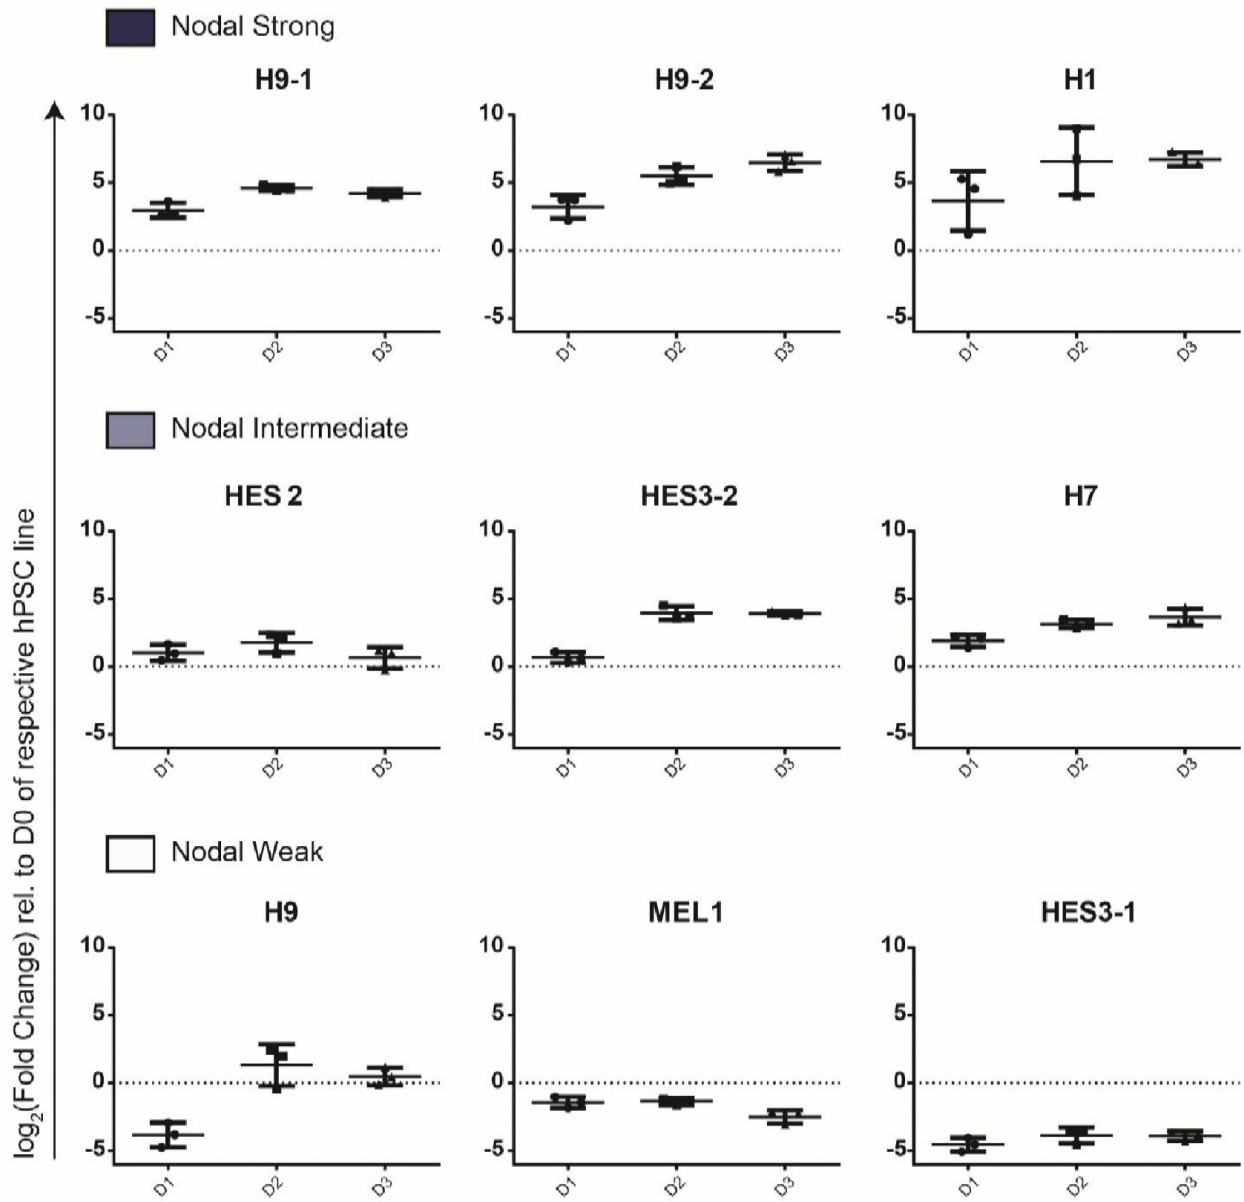

# Sup. Fig. 4

A)

NODAL

Scaled (columns)  $\log_2(\text{fold change})$  rel. to D0 of respective hPSC line

High  $\rightarrow$   Low  $\rightarrow$  

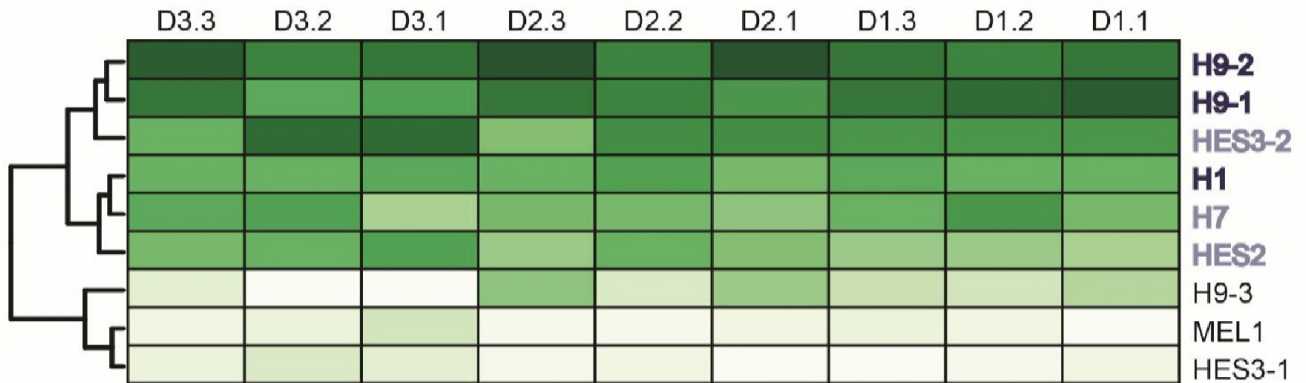

**H9-1, H9-2, H1**

**HES2, HES3-2, H7**

H9-3, MEL1, HES3-1

K-means clusters of Nodal dynamics

 NODAL Strong

 NODAL Intermediate

 NODAL Weak

B)

GDF3

Scaled (columns)  $\log_2(\text{fold change})$  rel. to D0 of respective hPSC line

High  $\rightarrow$   Low  $\rightarrow$  

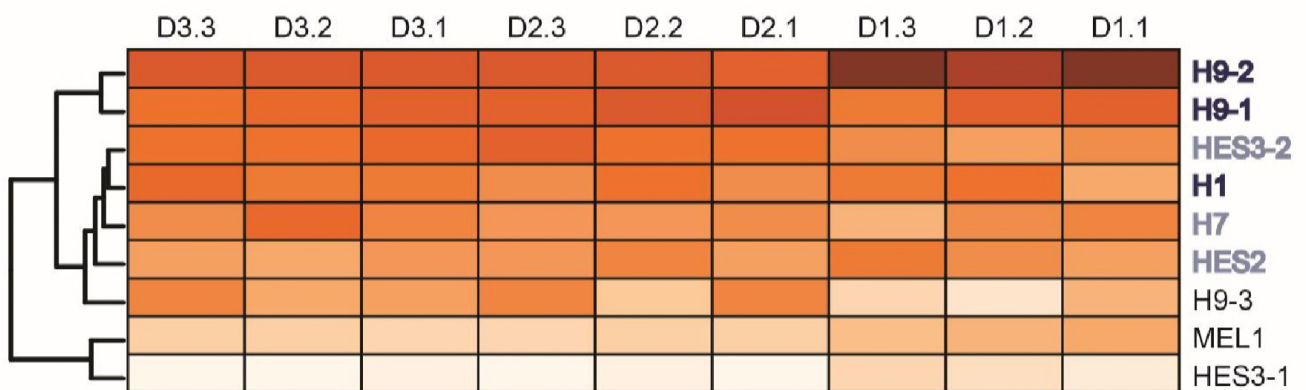

**H9-1, H9-2, H1**

**HES2, HES3-2, H7**

H9-3, MEL1, HES3-1

K-means clusters of Nodal dynamics

 NODAL Strong

 NODAL Intermediate

 NODAL Weak

# Sup. Fig. 5

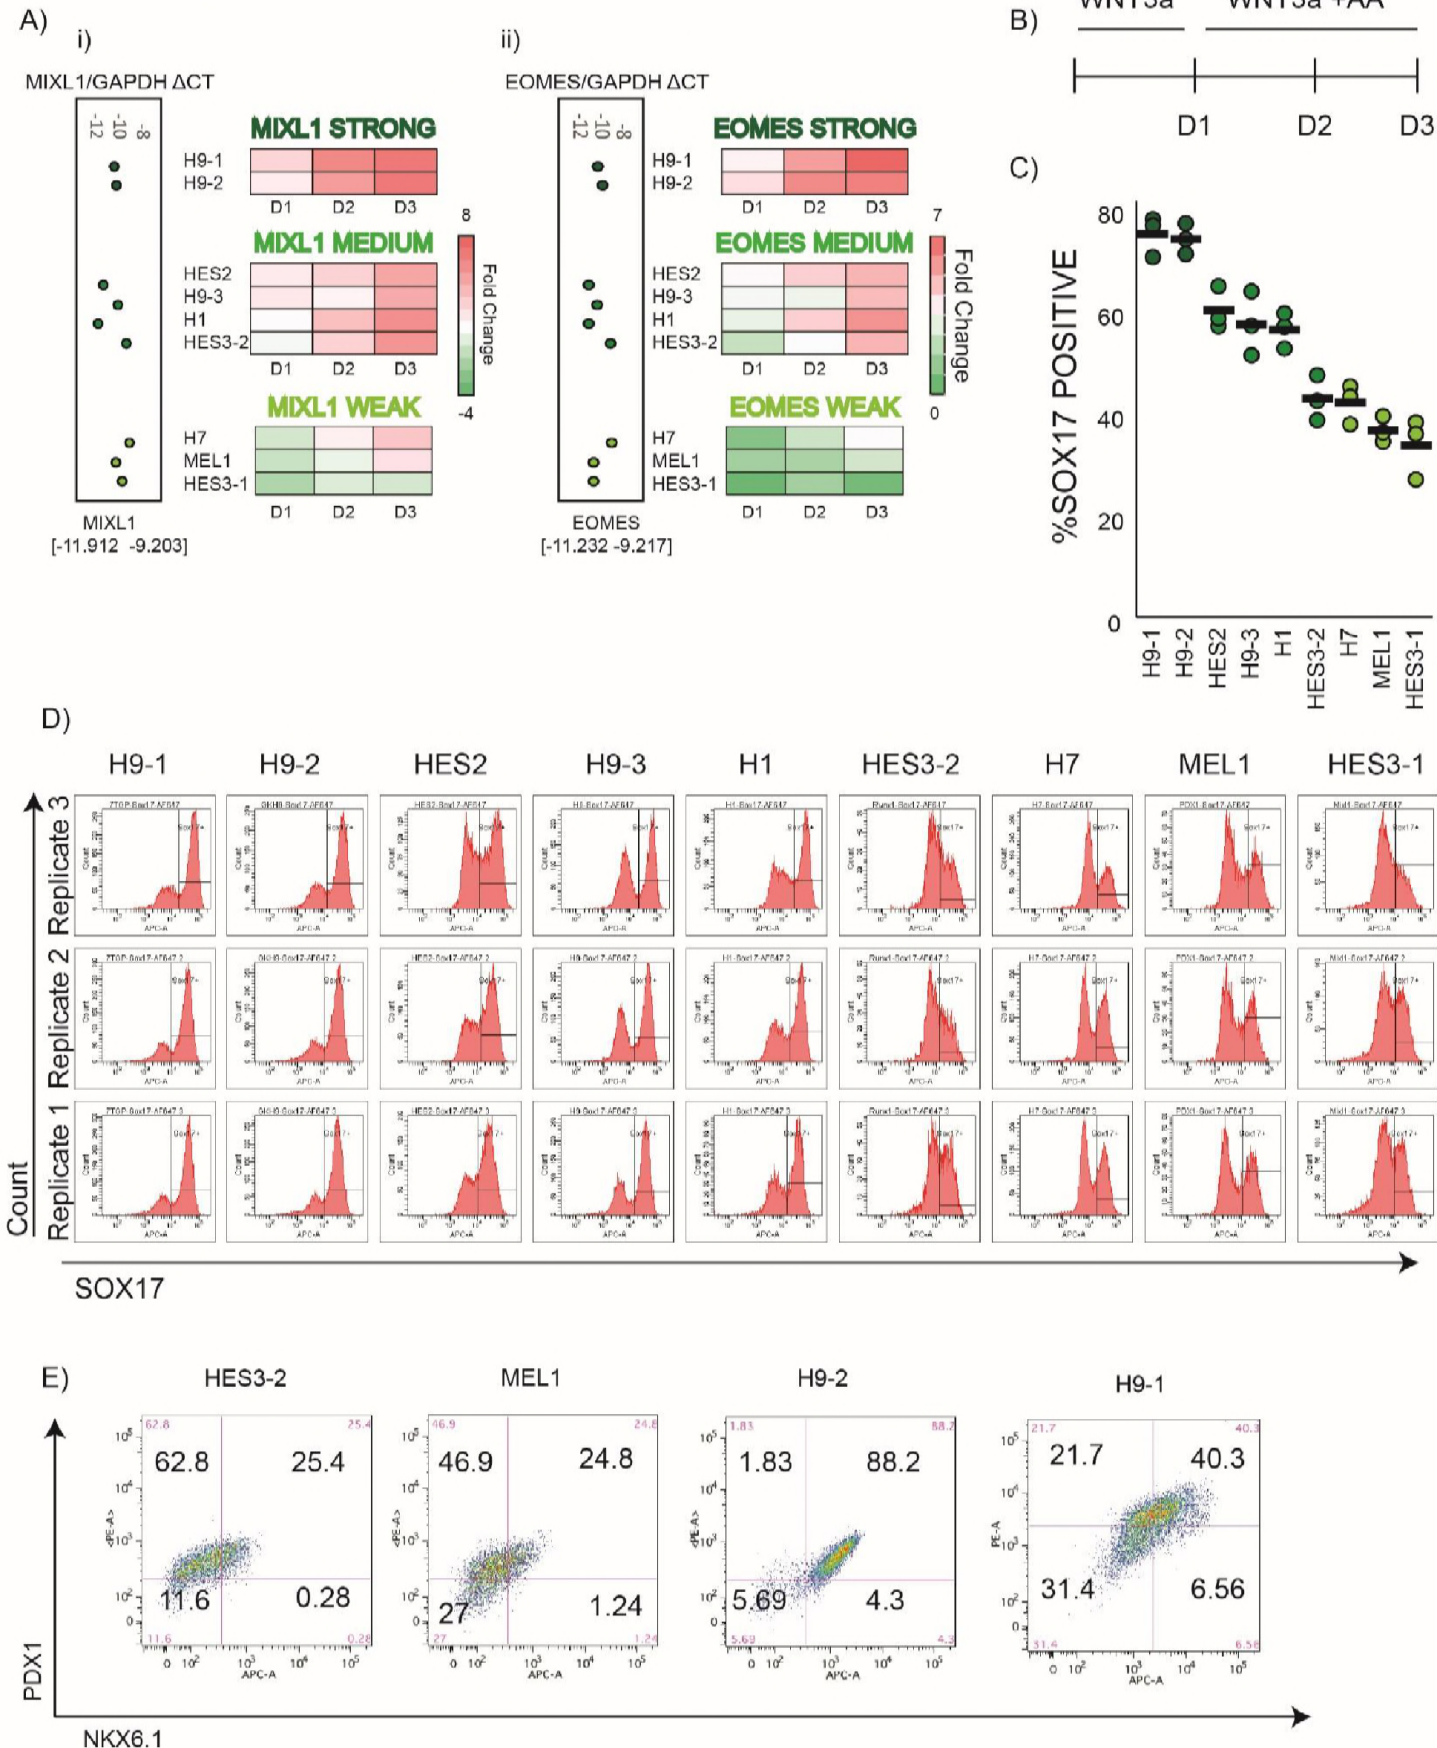

Sup. Fig. 6

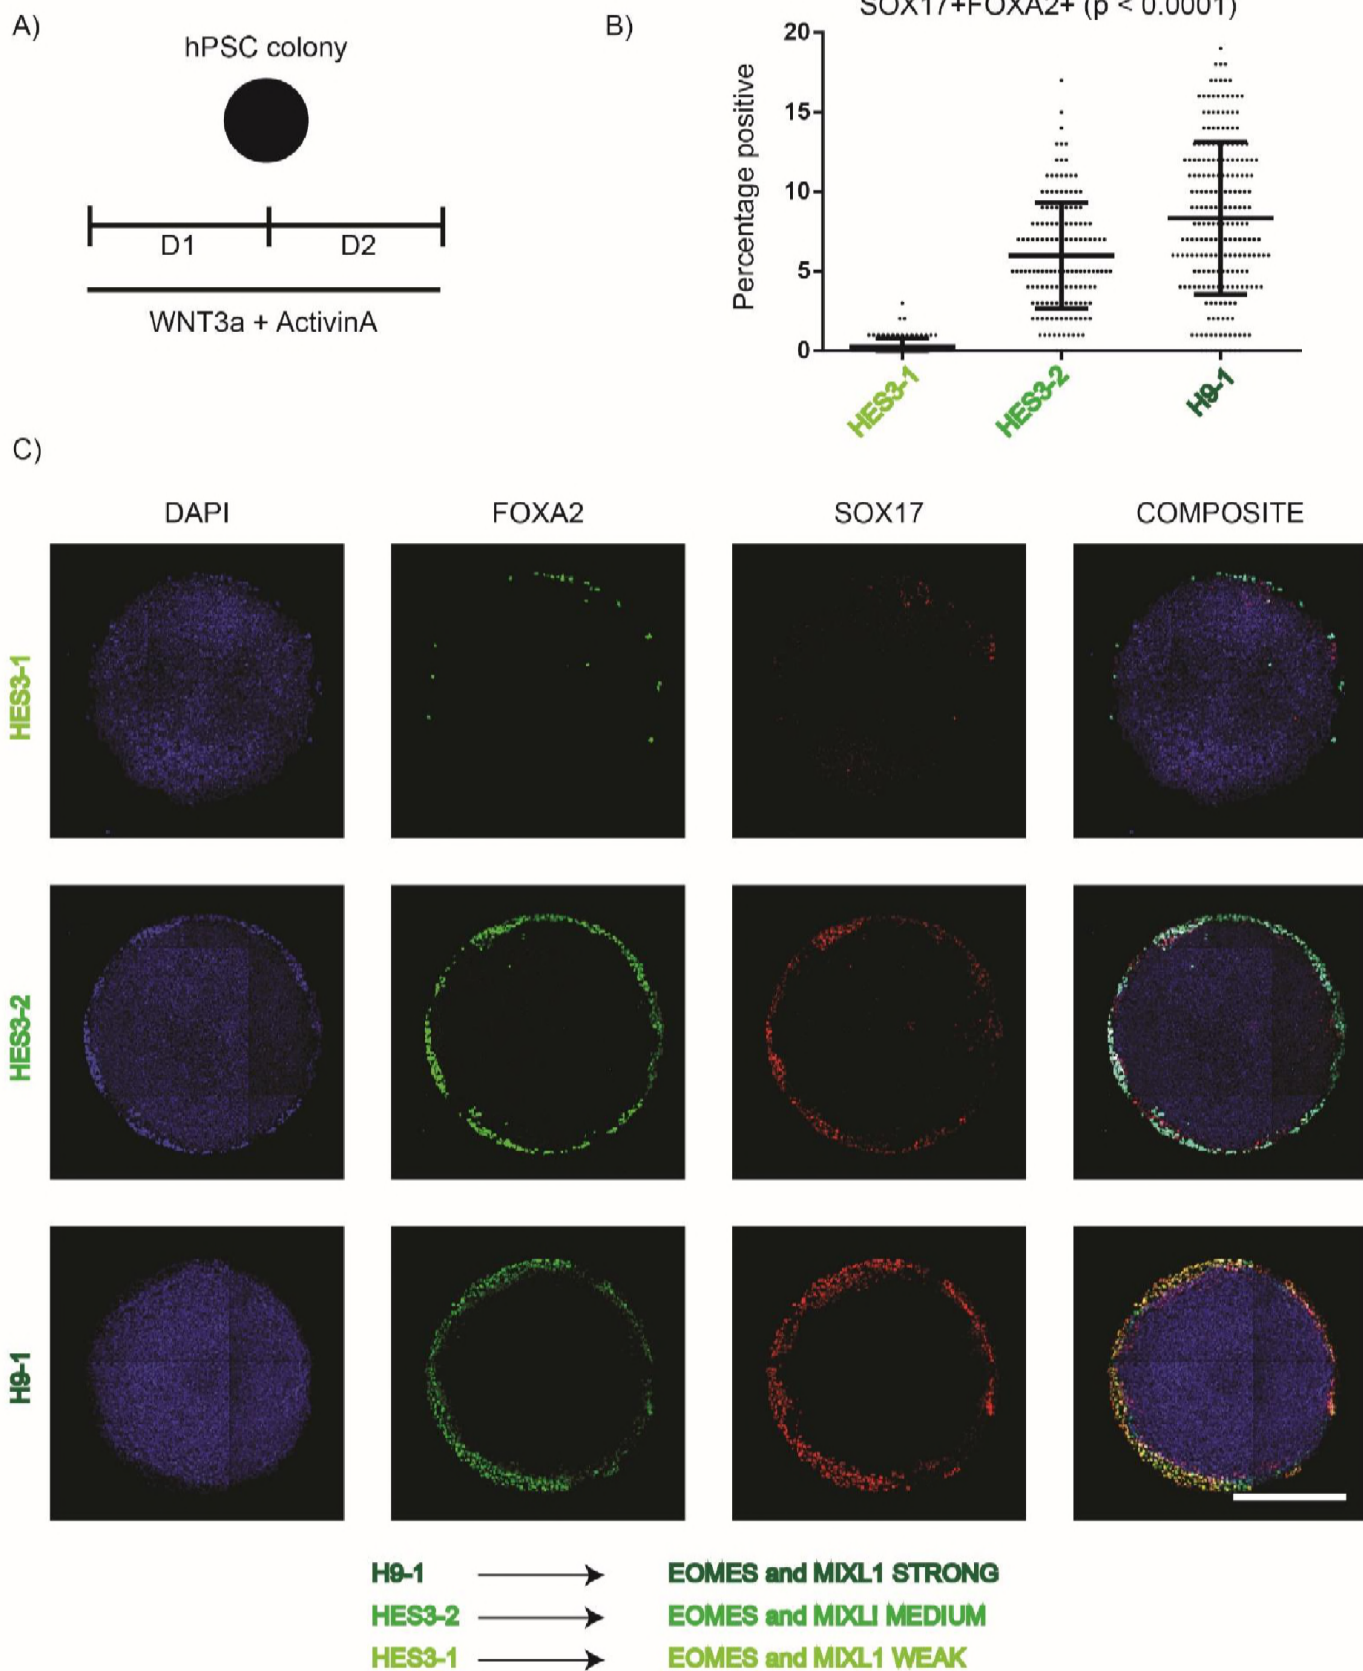

Sup. Fig. 7 BRA ( $p = 0.04$ )

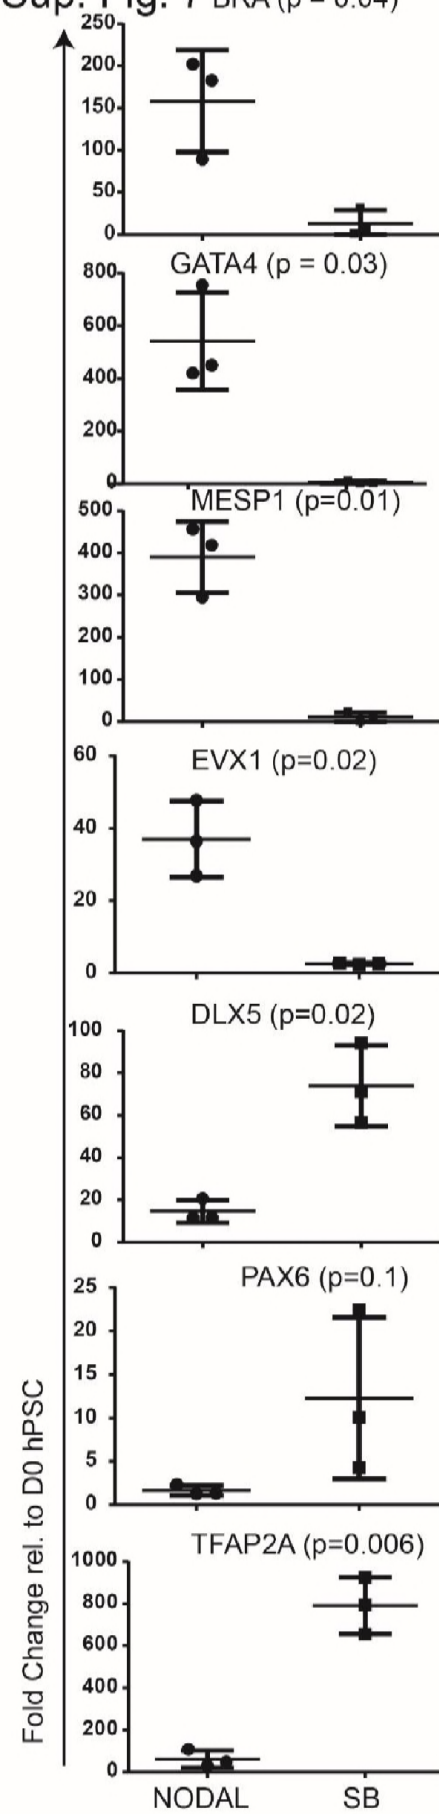

EOMES ( $p = 0.005$ )

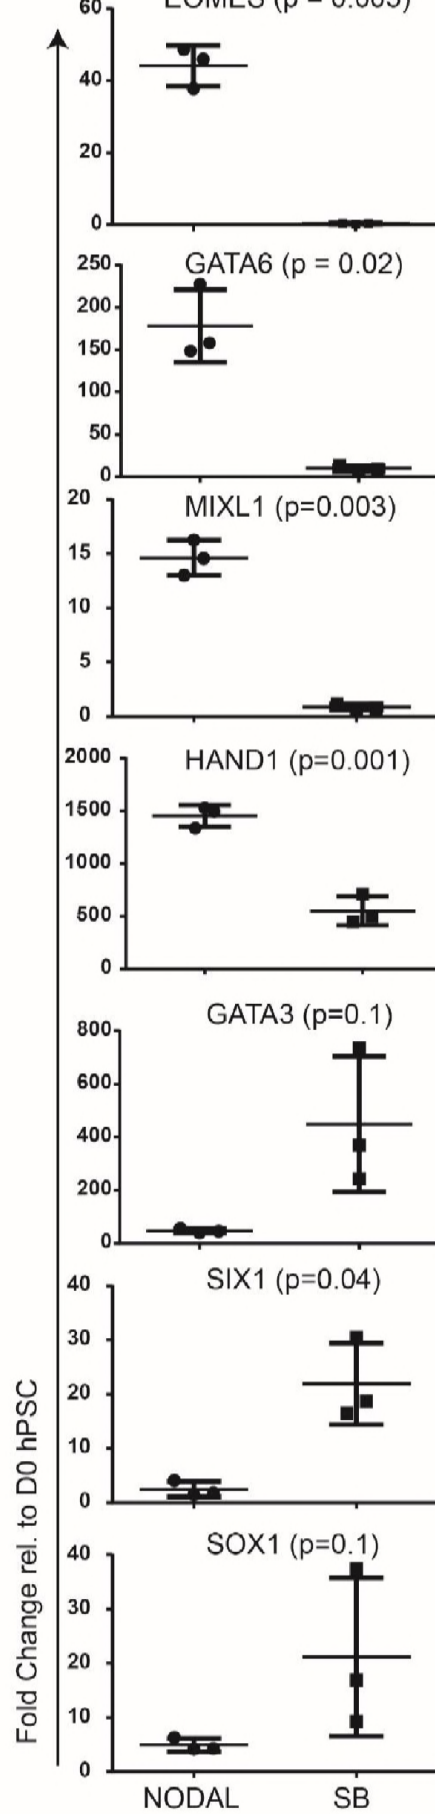

FOXA2 ( $p = 0.004$ )

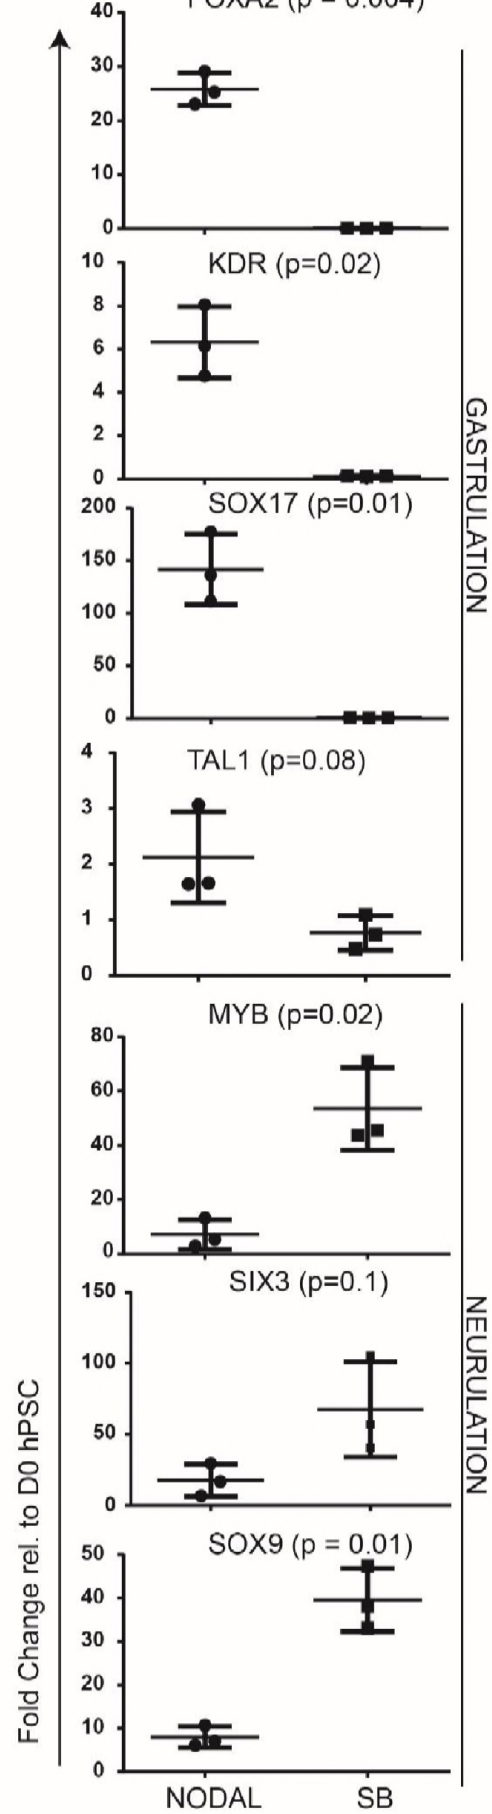

GASTRULATION

NEURULATION



# Sup Fig. 8

A)

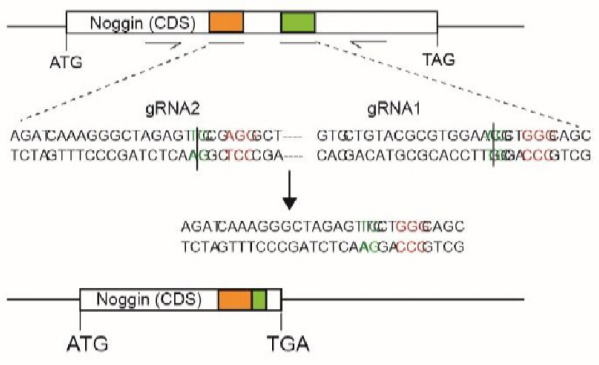

B)

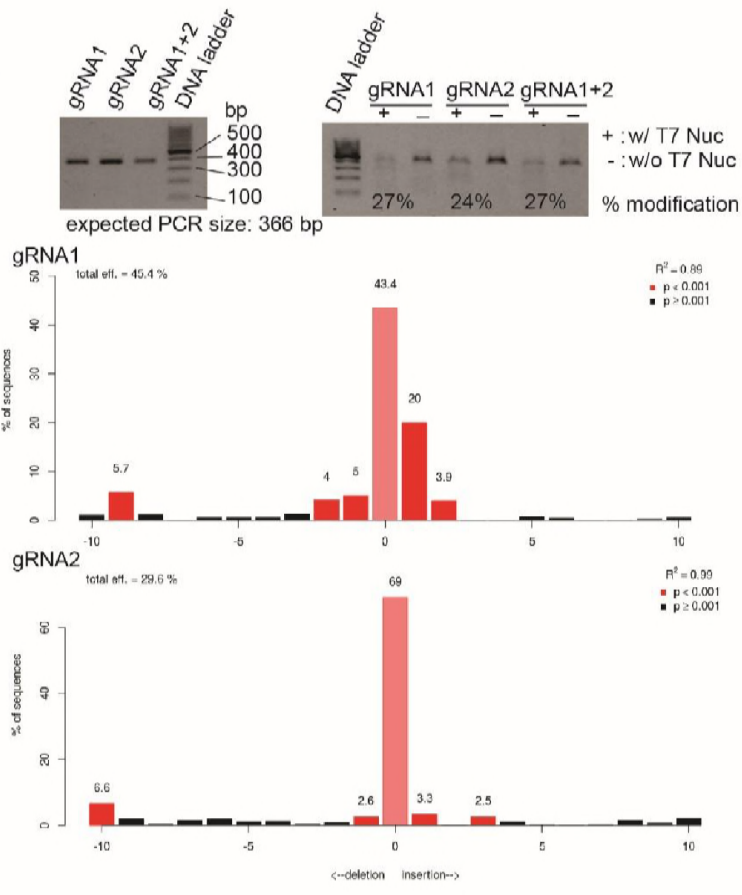

C)

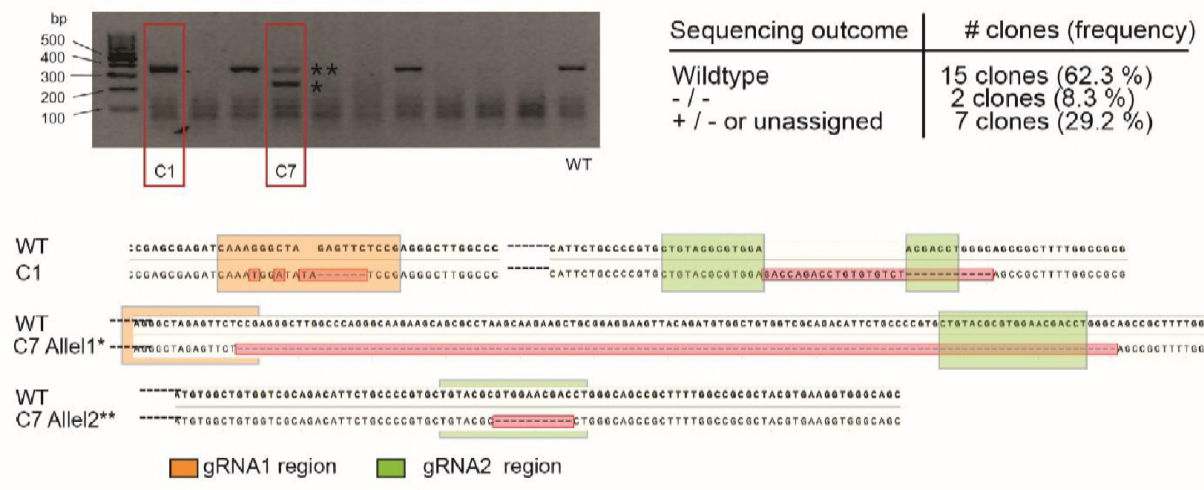

D)

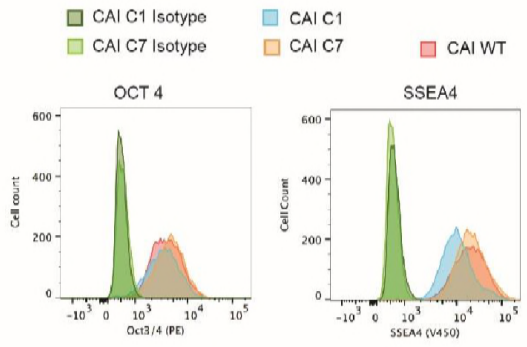

# Sup Fig. 9

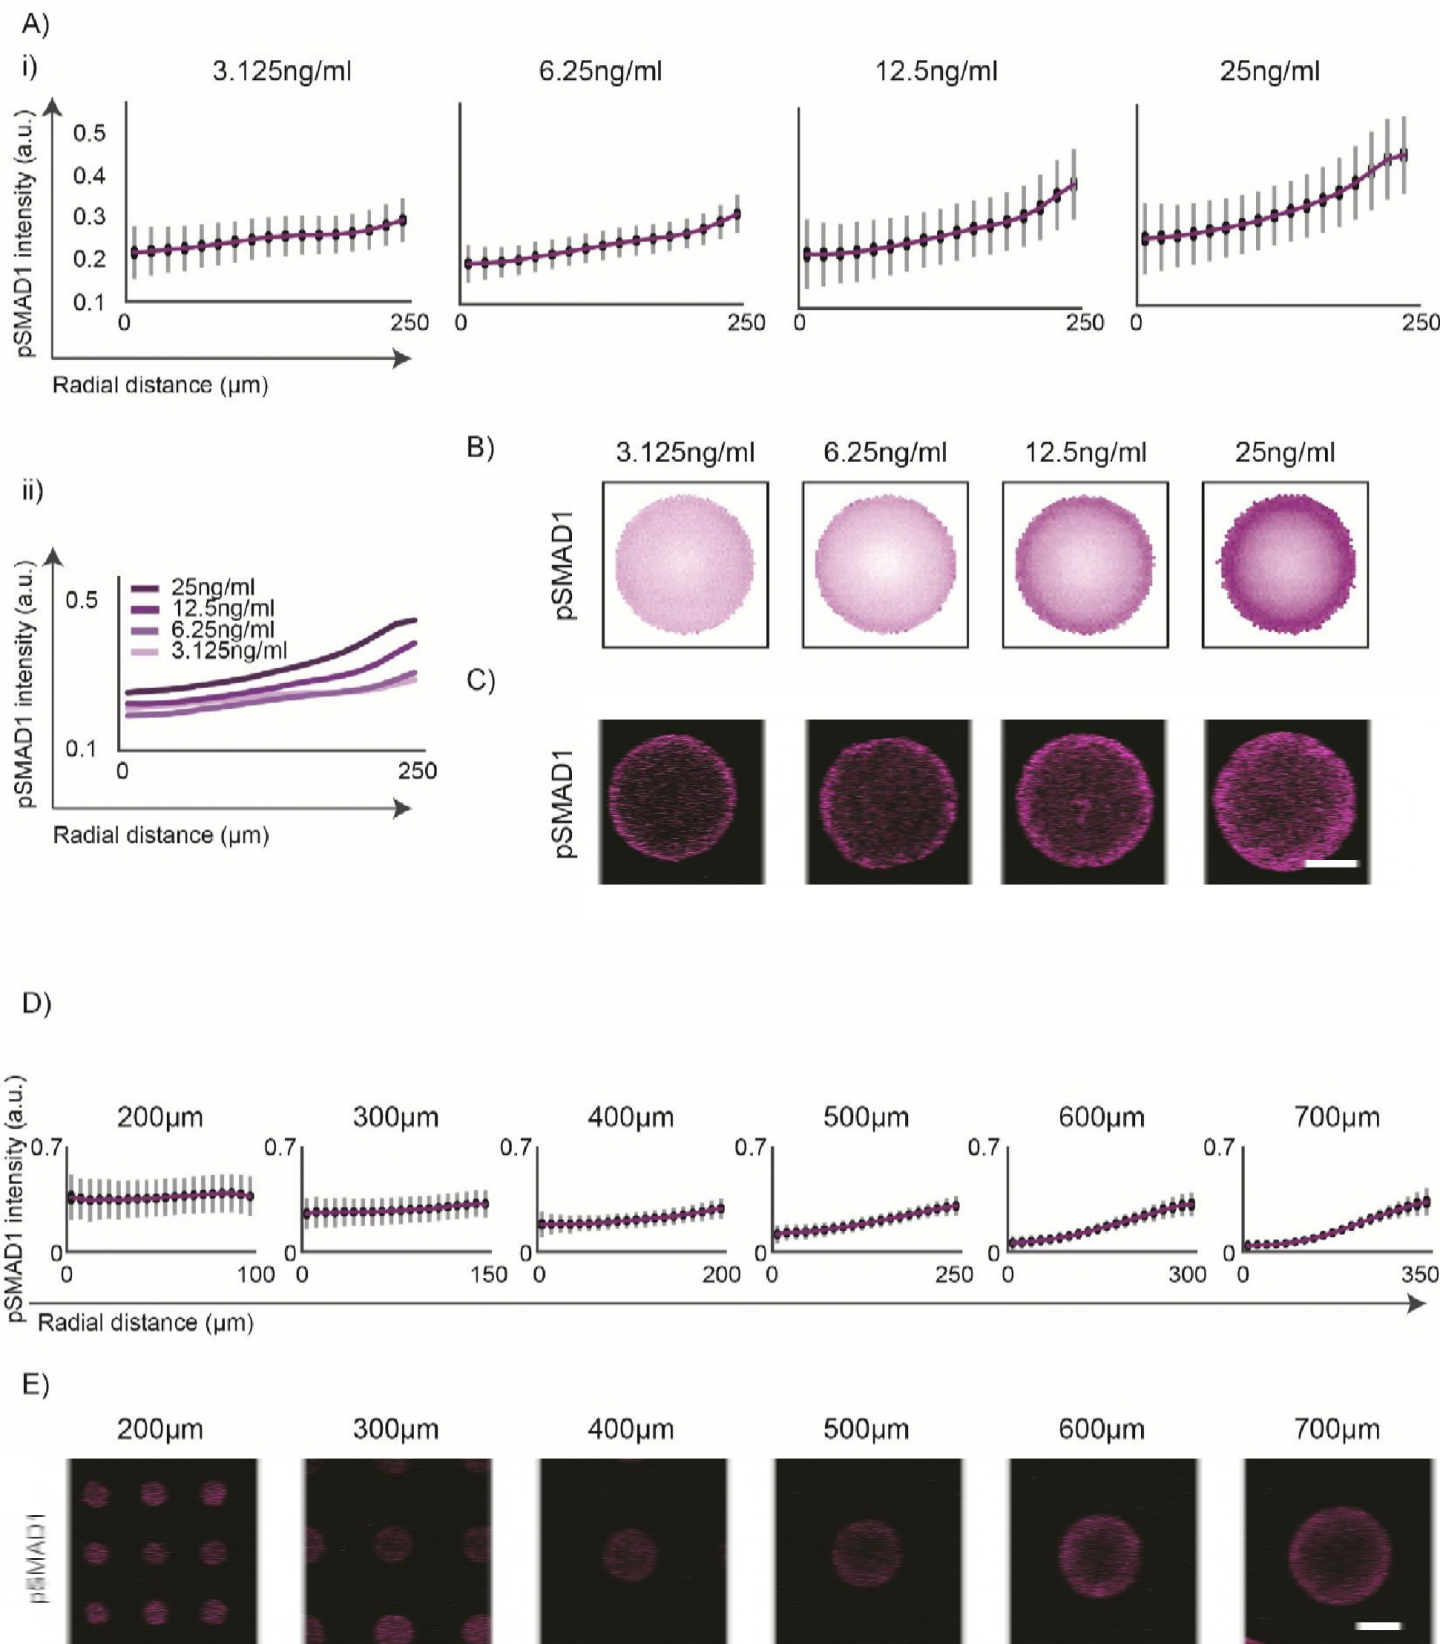

# Sup Fig. 10

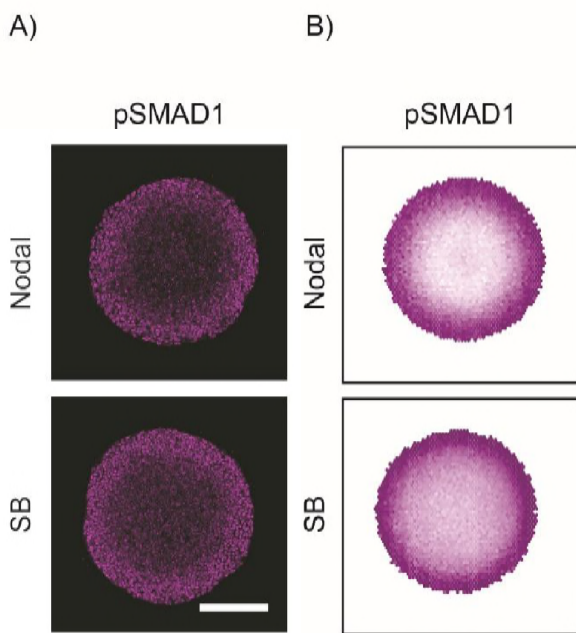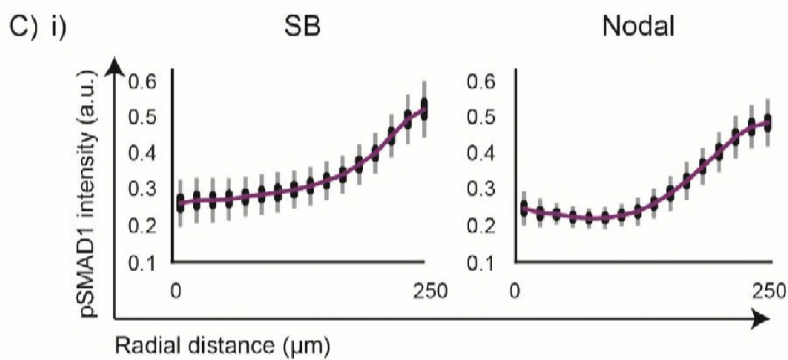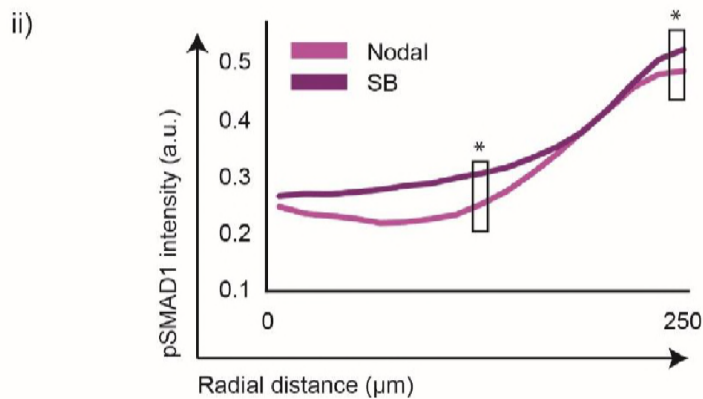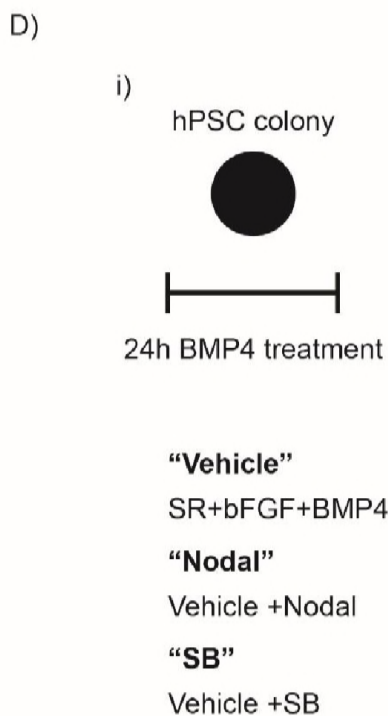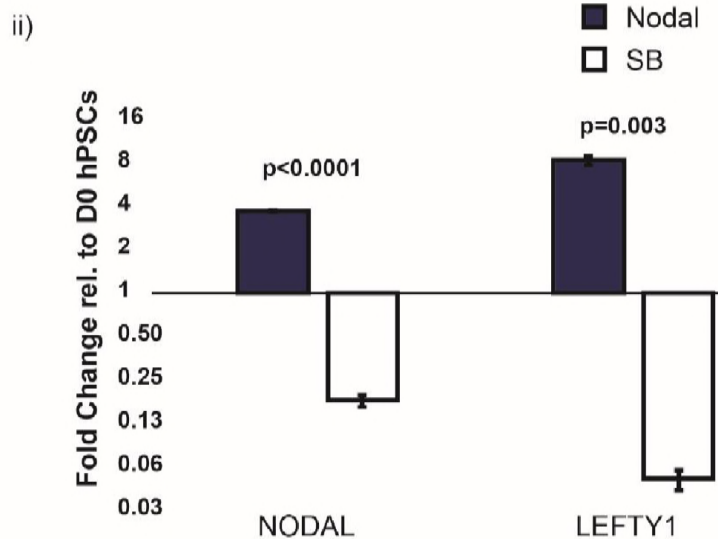

# Sup Fig. 11

A)

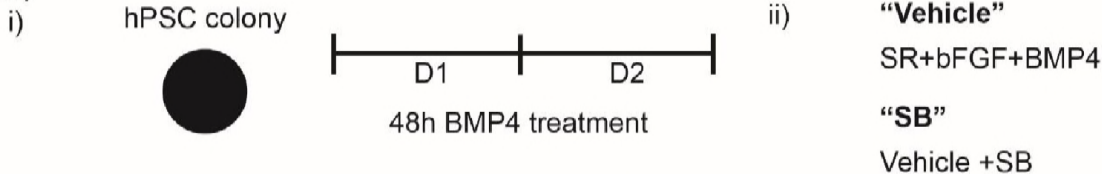

B)

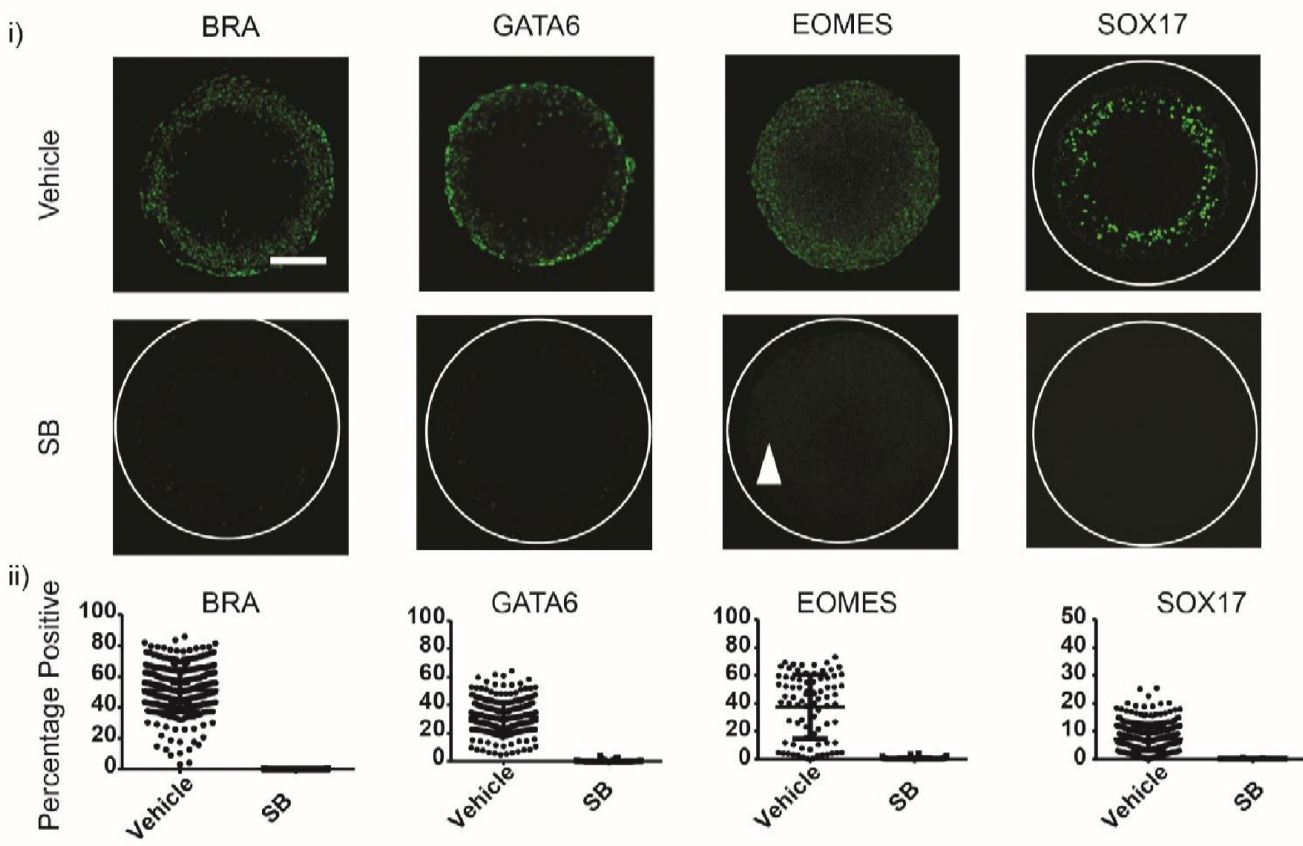

C)

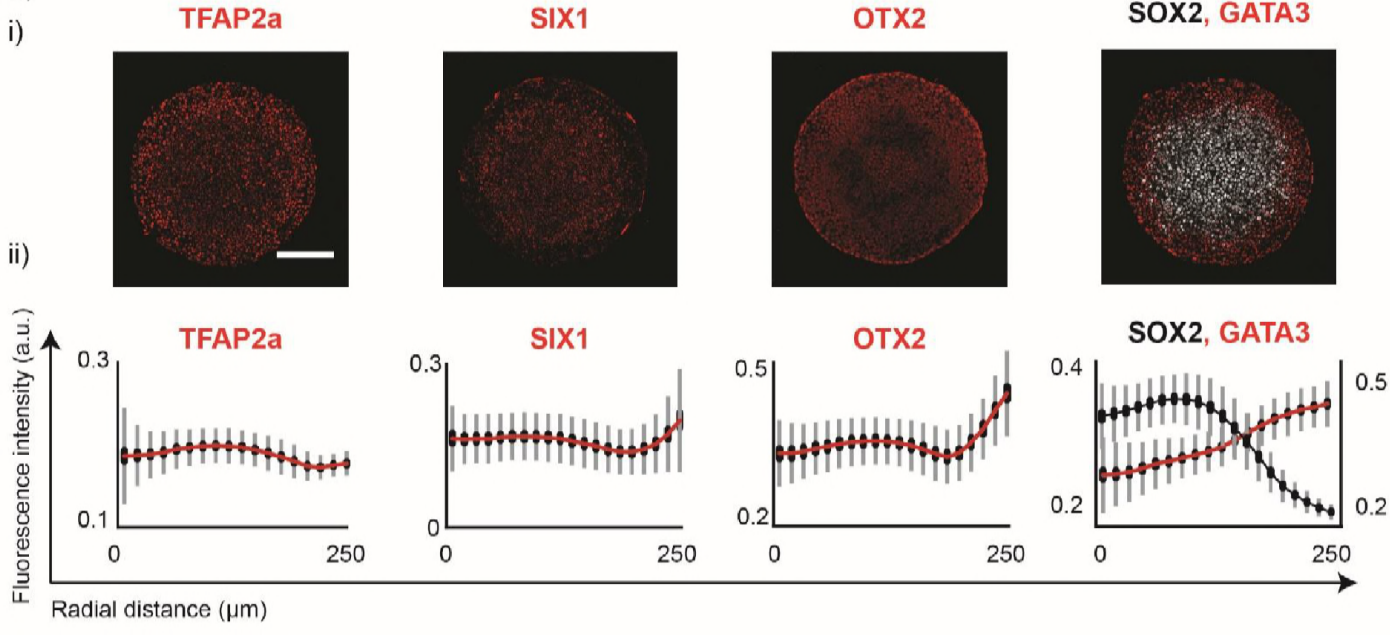

# Sup Fig. 12

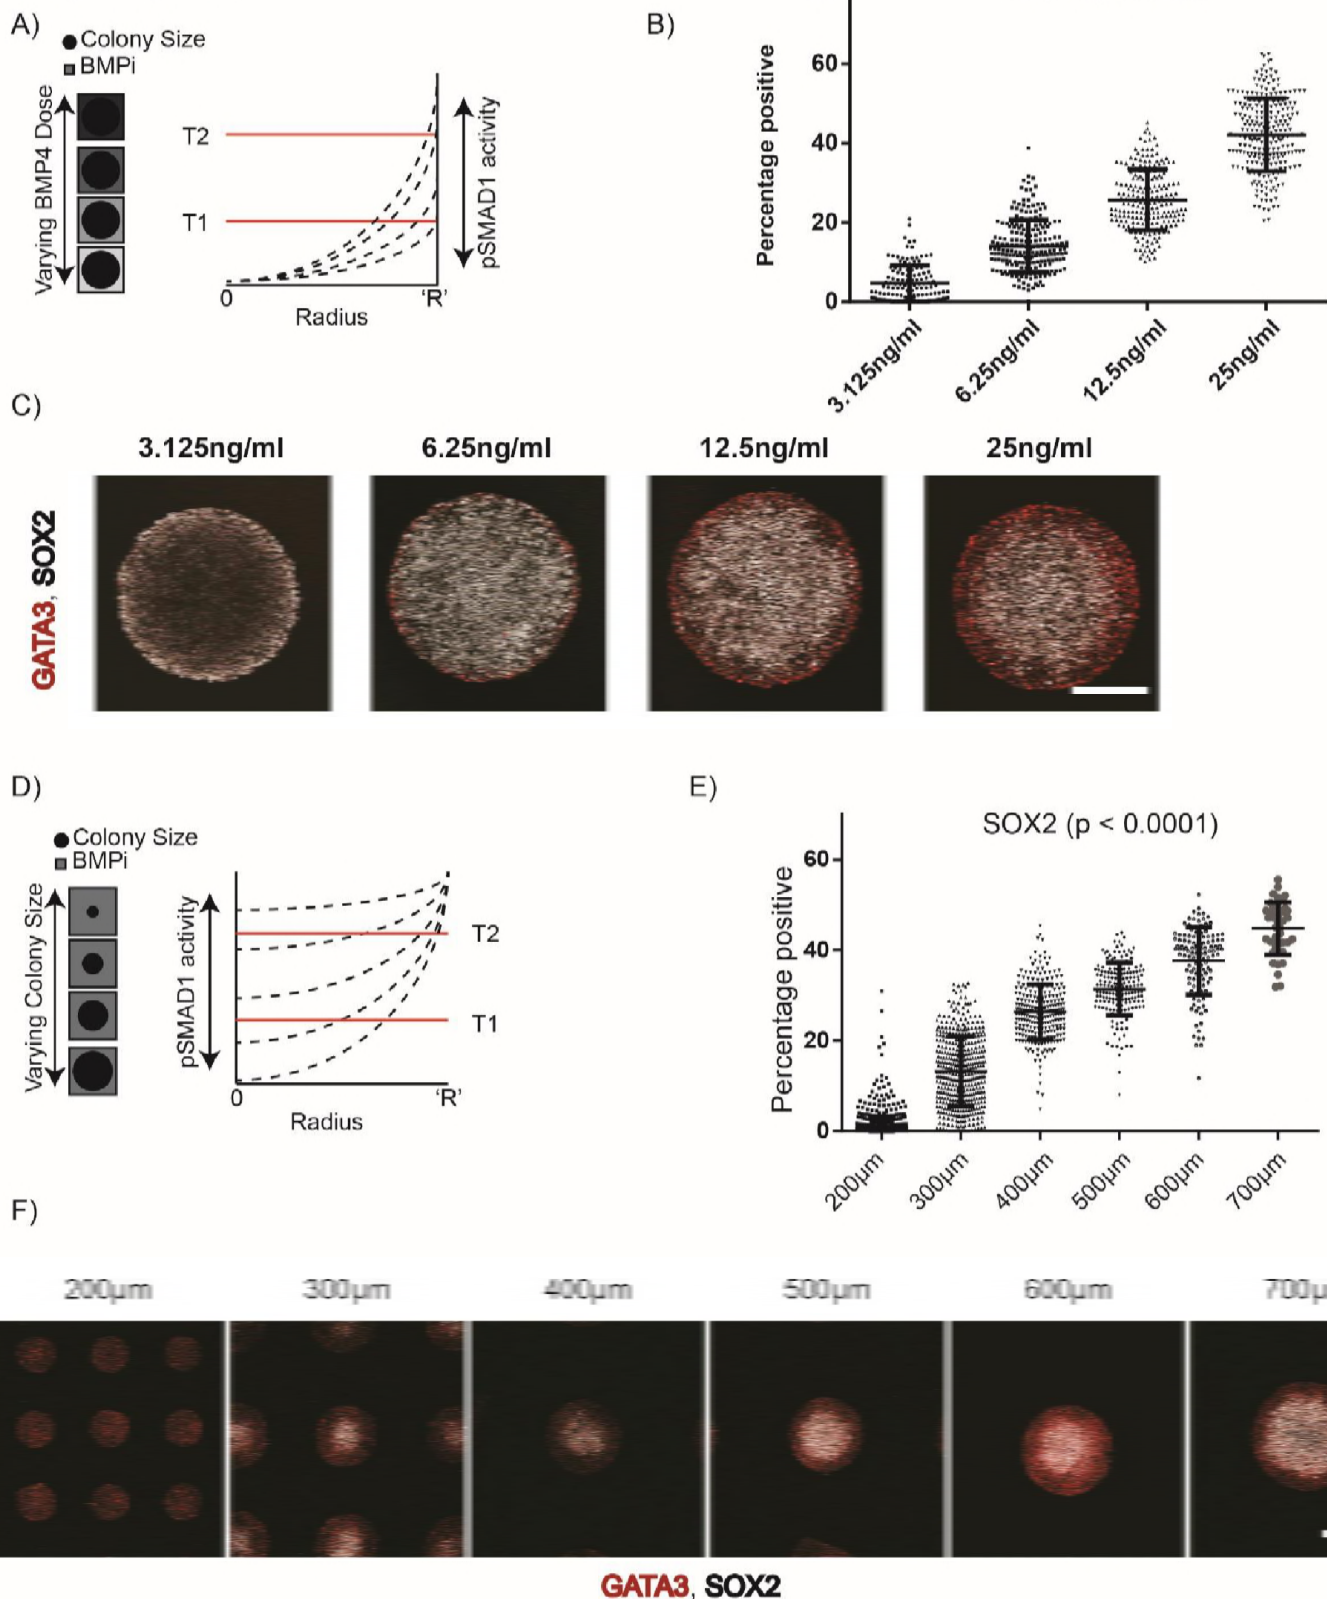

Sup Fig. 13

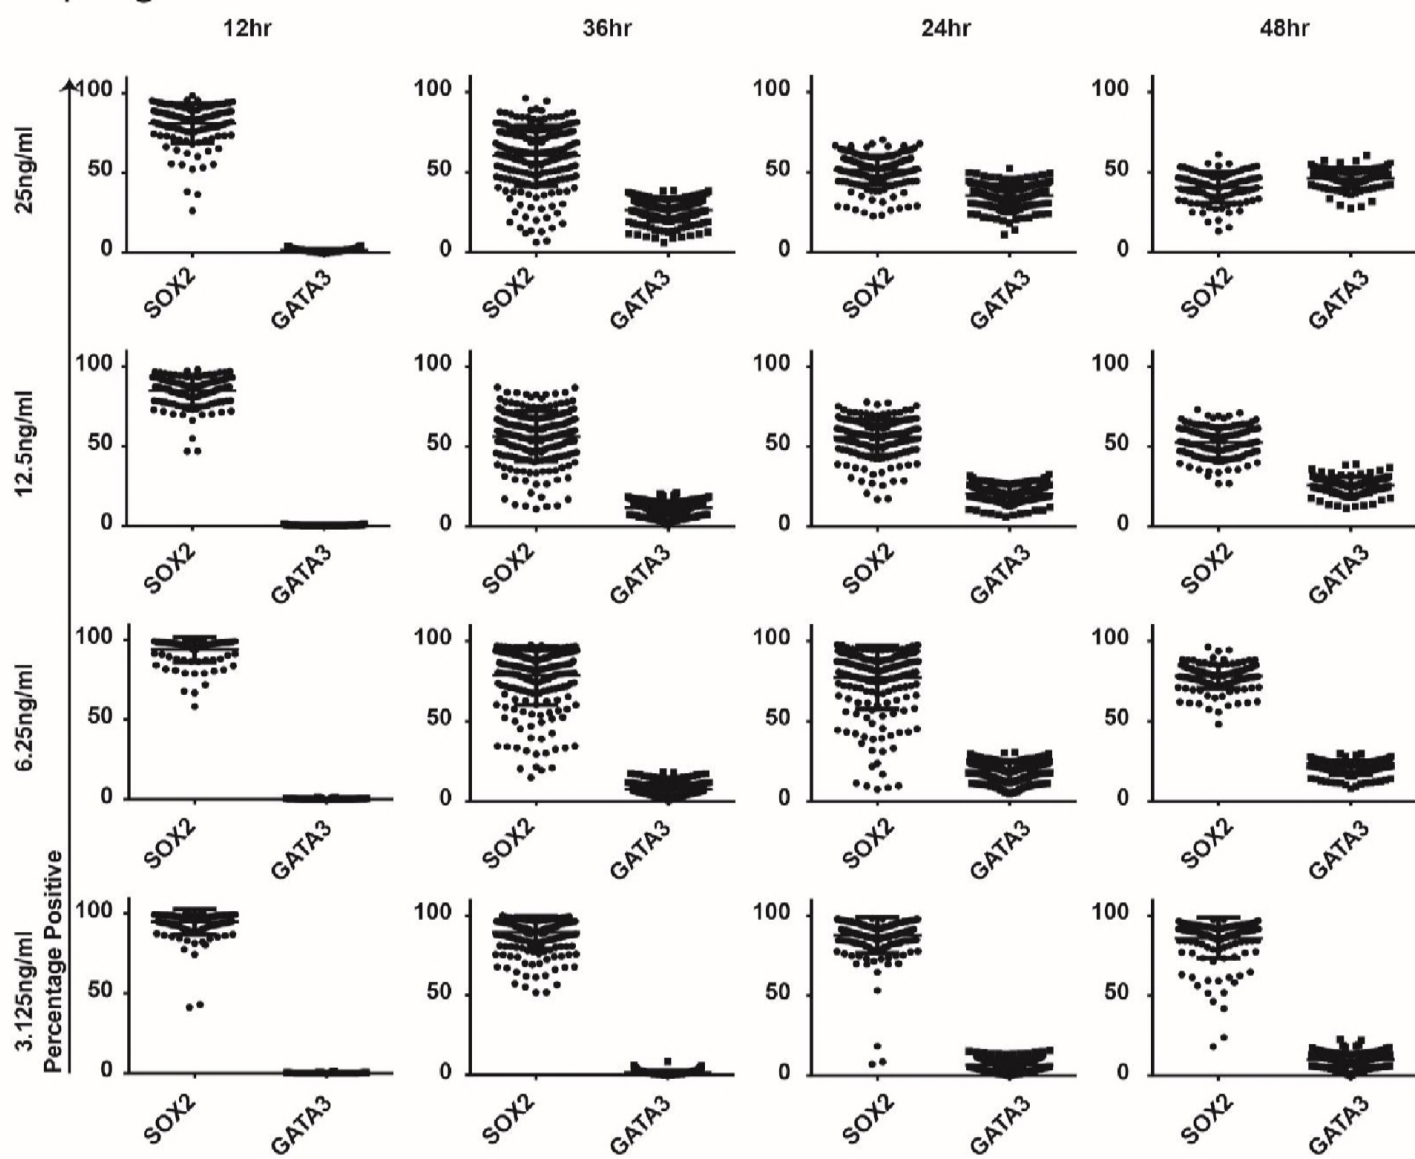

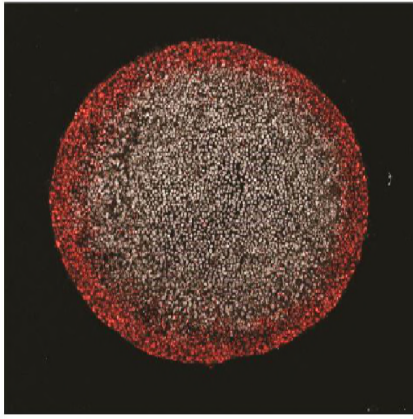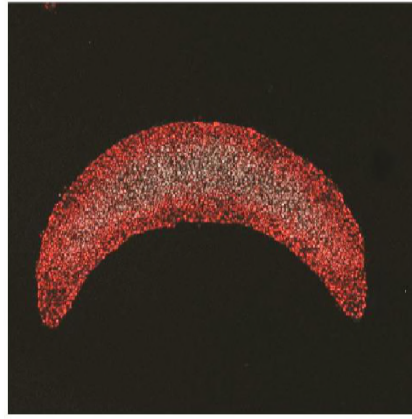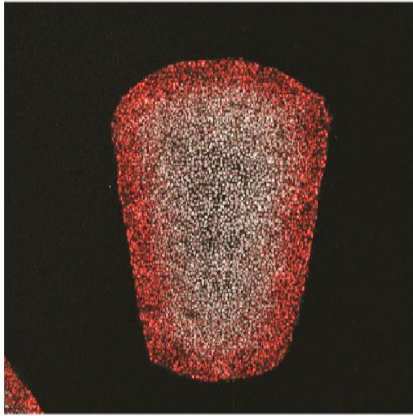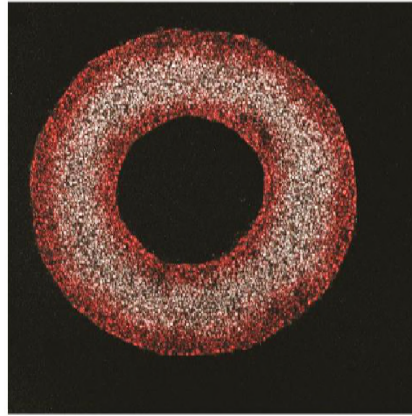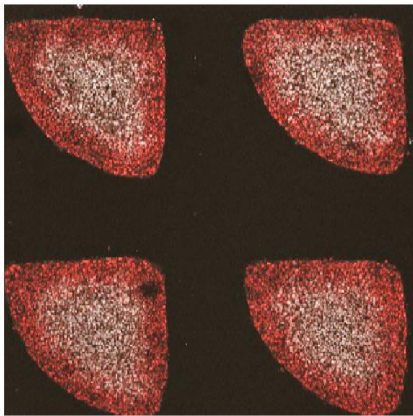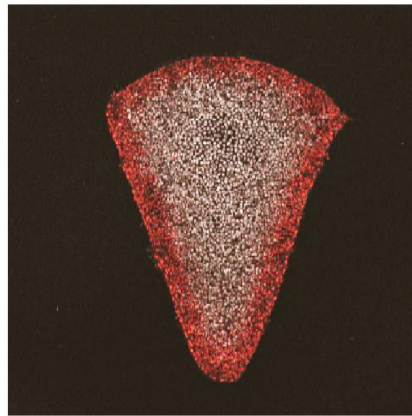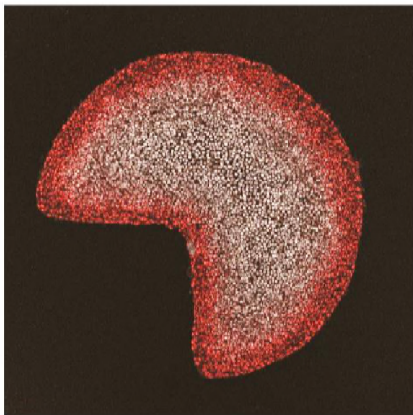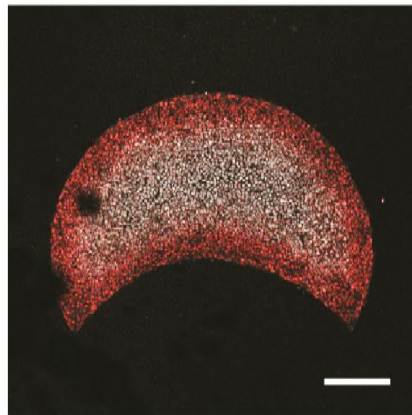

POINT CLOUD

Sup Fig. 15

BMP4 (50ng/ml in SR)

A)

B)

pSMAD1

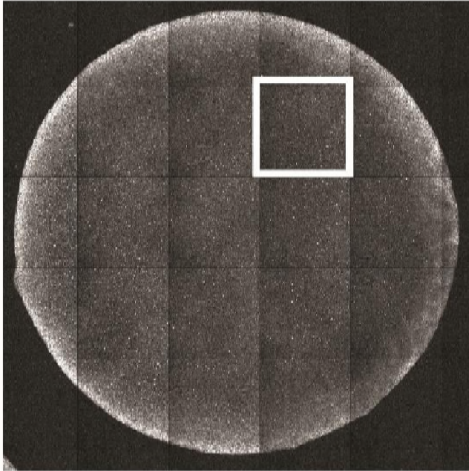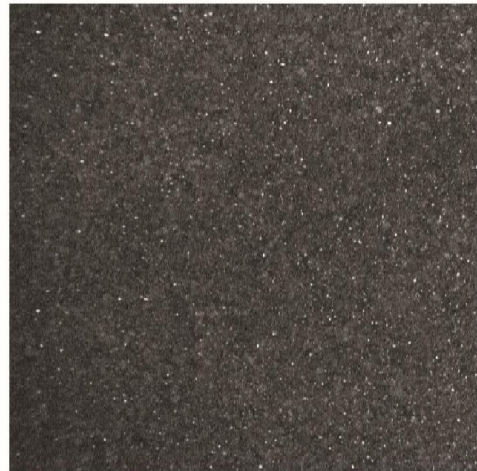

pSMAD1

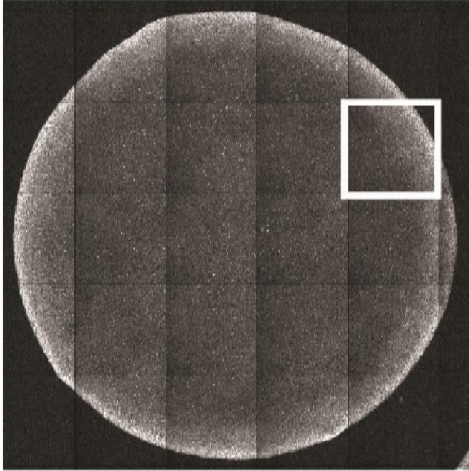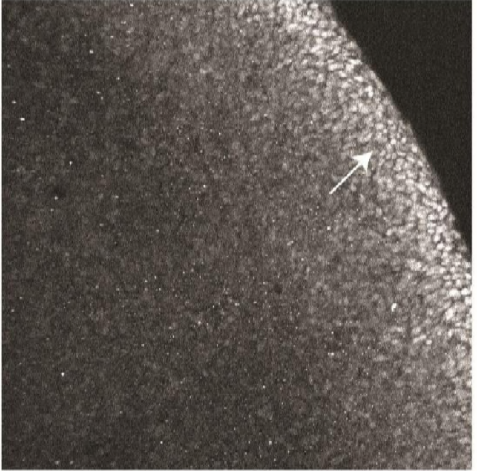

pSMAD1

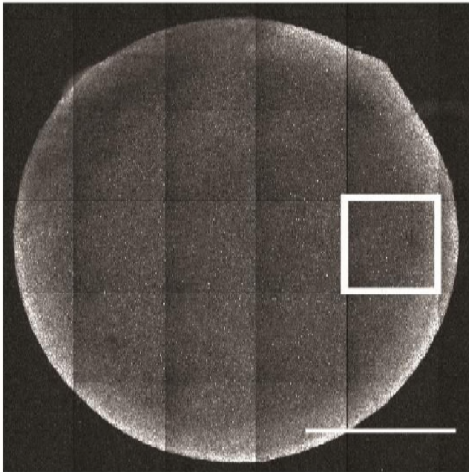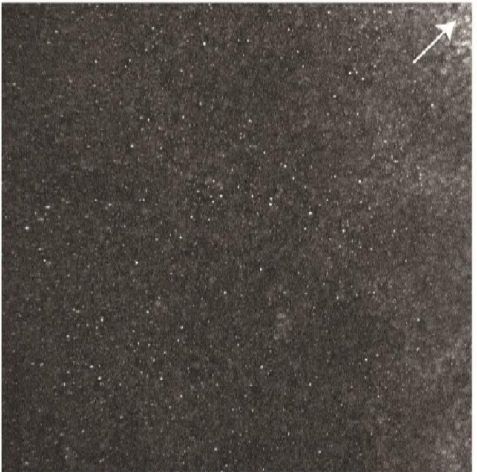



Sup Fig. 16

BMP4 (200ng/ml in SR)

A)

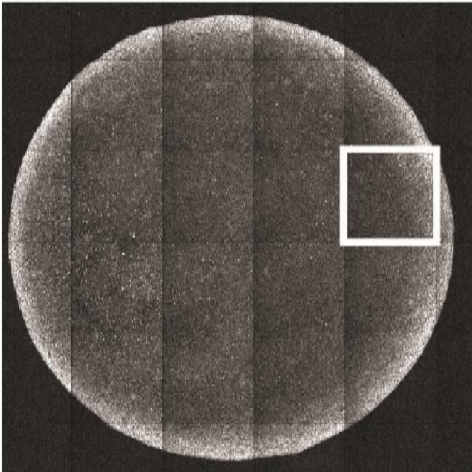

B)

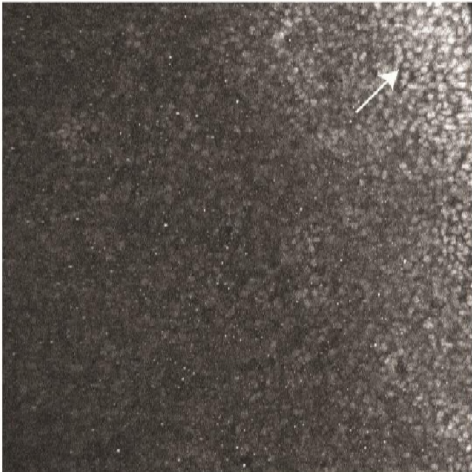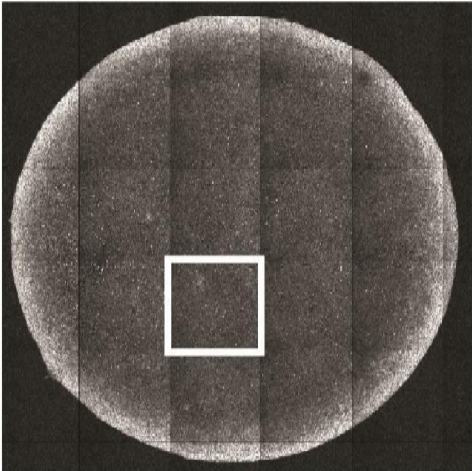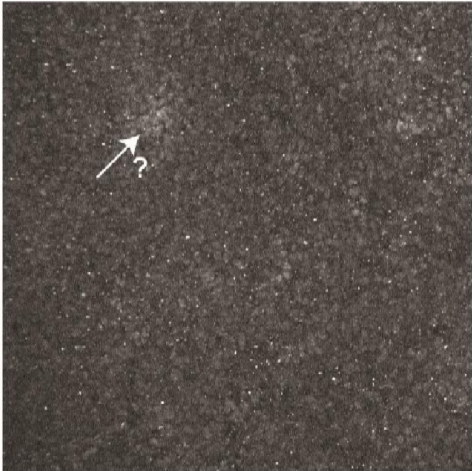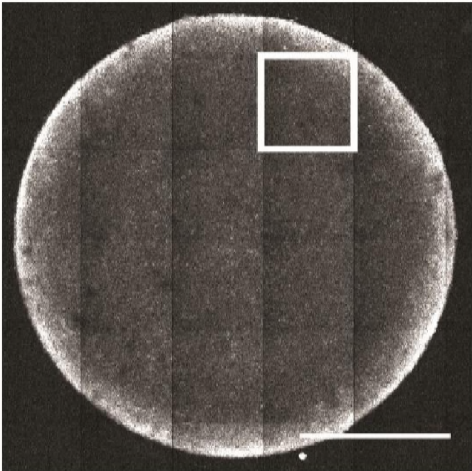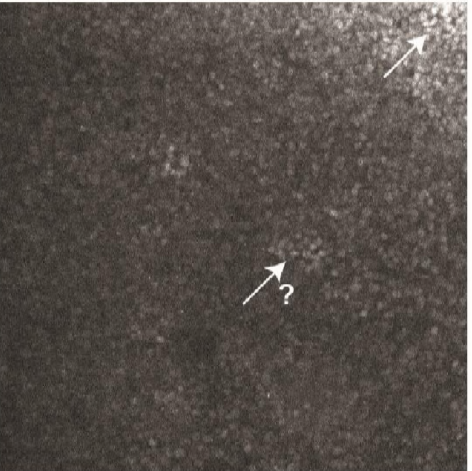

Sup Fig. 17

BMP4 (50ng/ml in N2B27)

A)

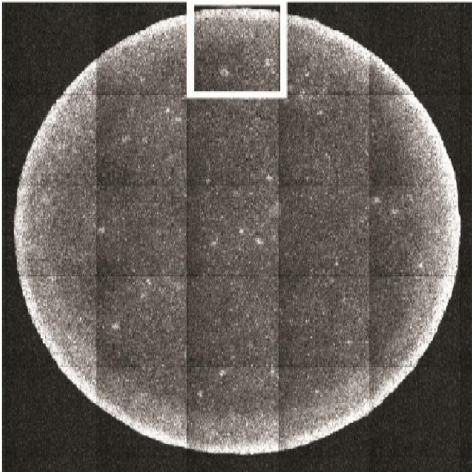

B)

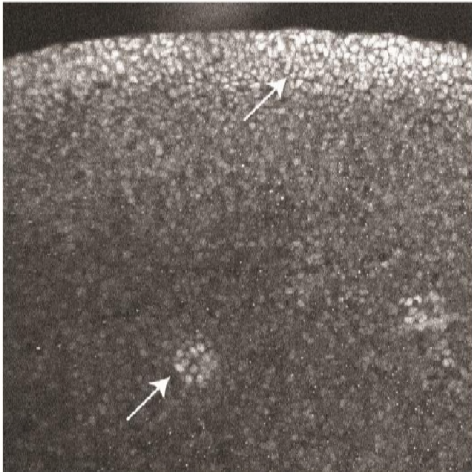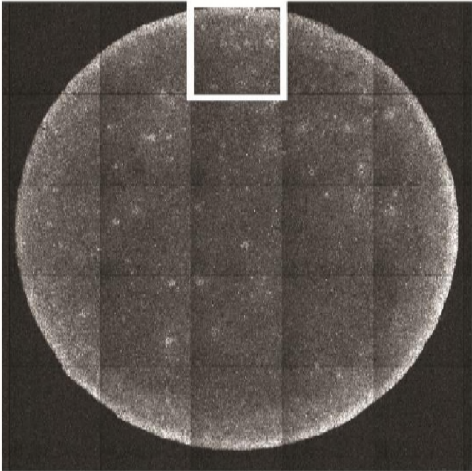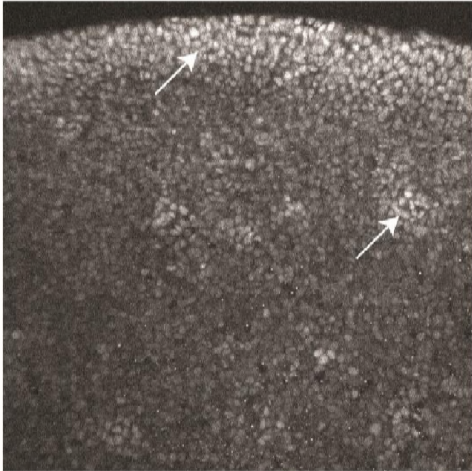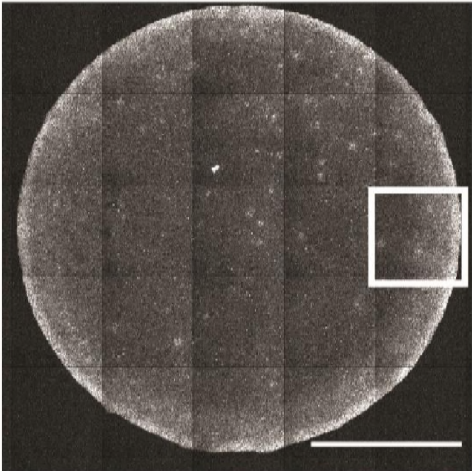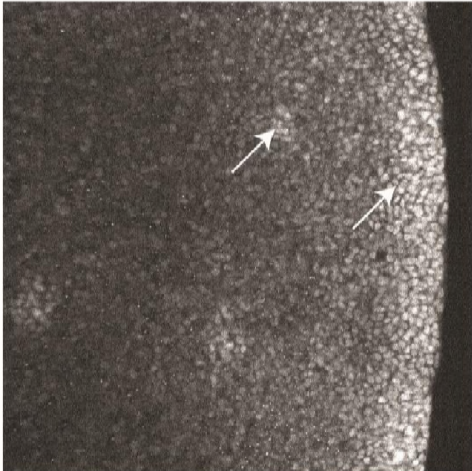

Sup Fig. 18

BMP4 (200ng/ml in N2B27)

A)

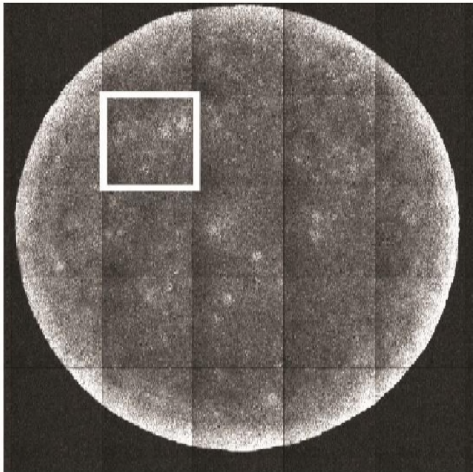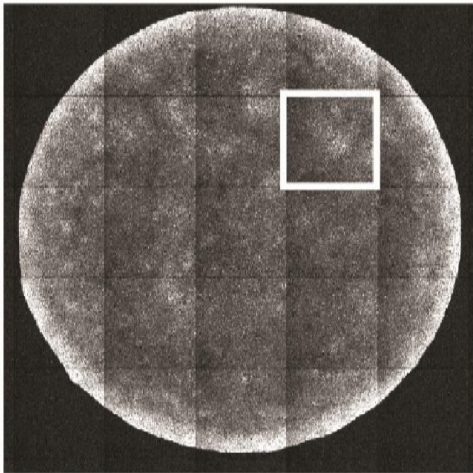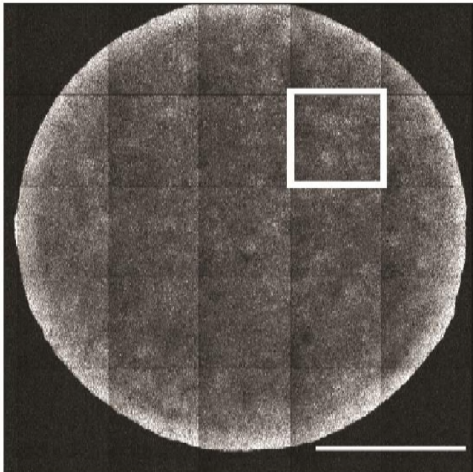

B)

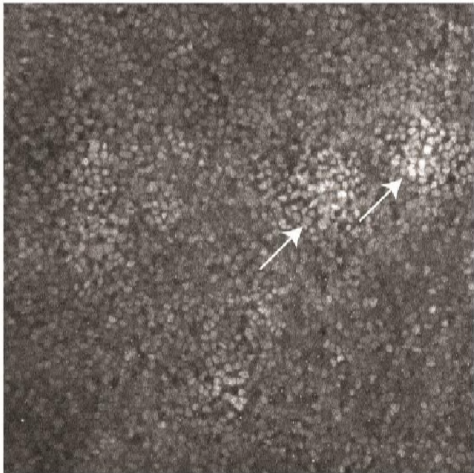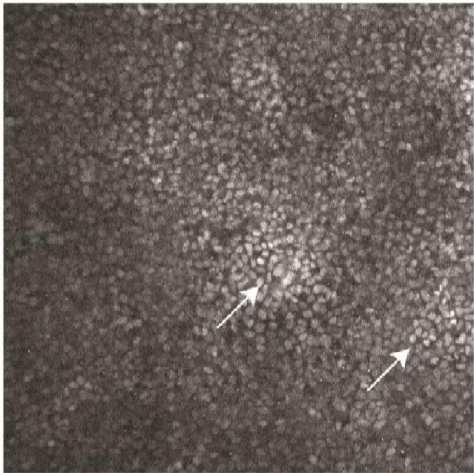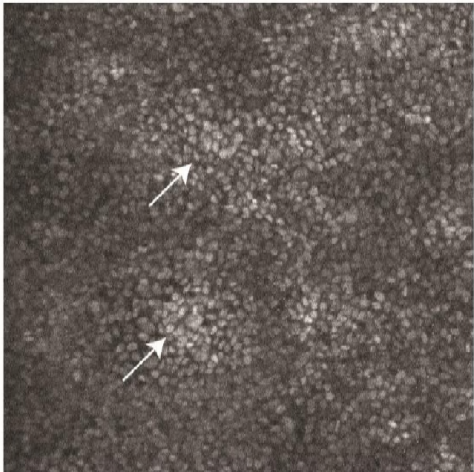

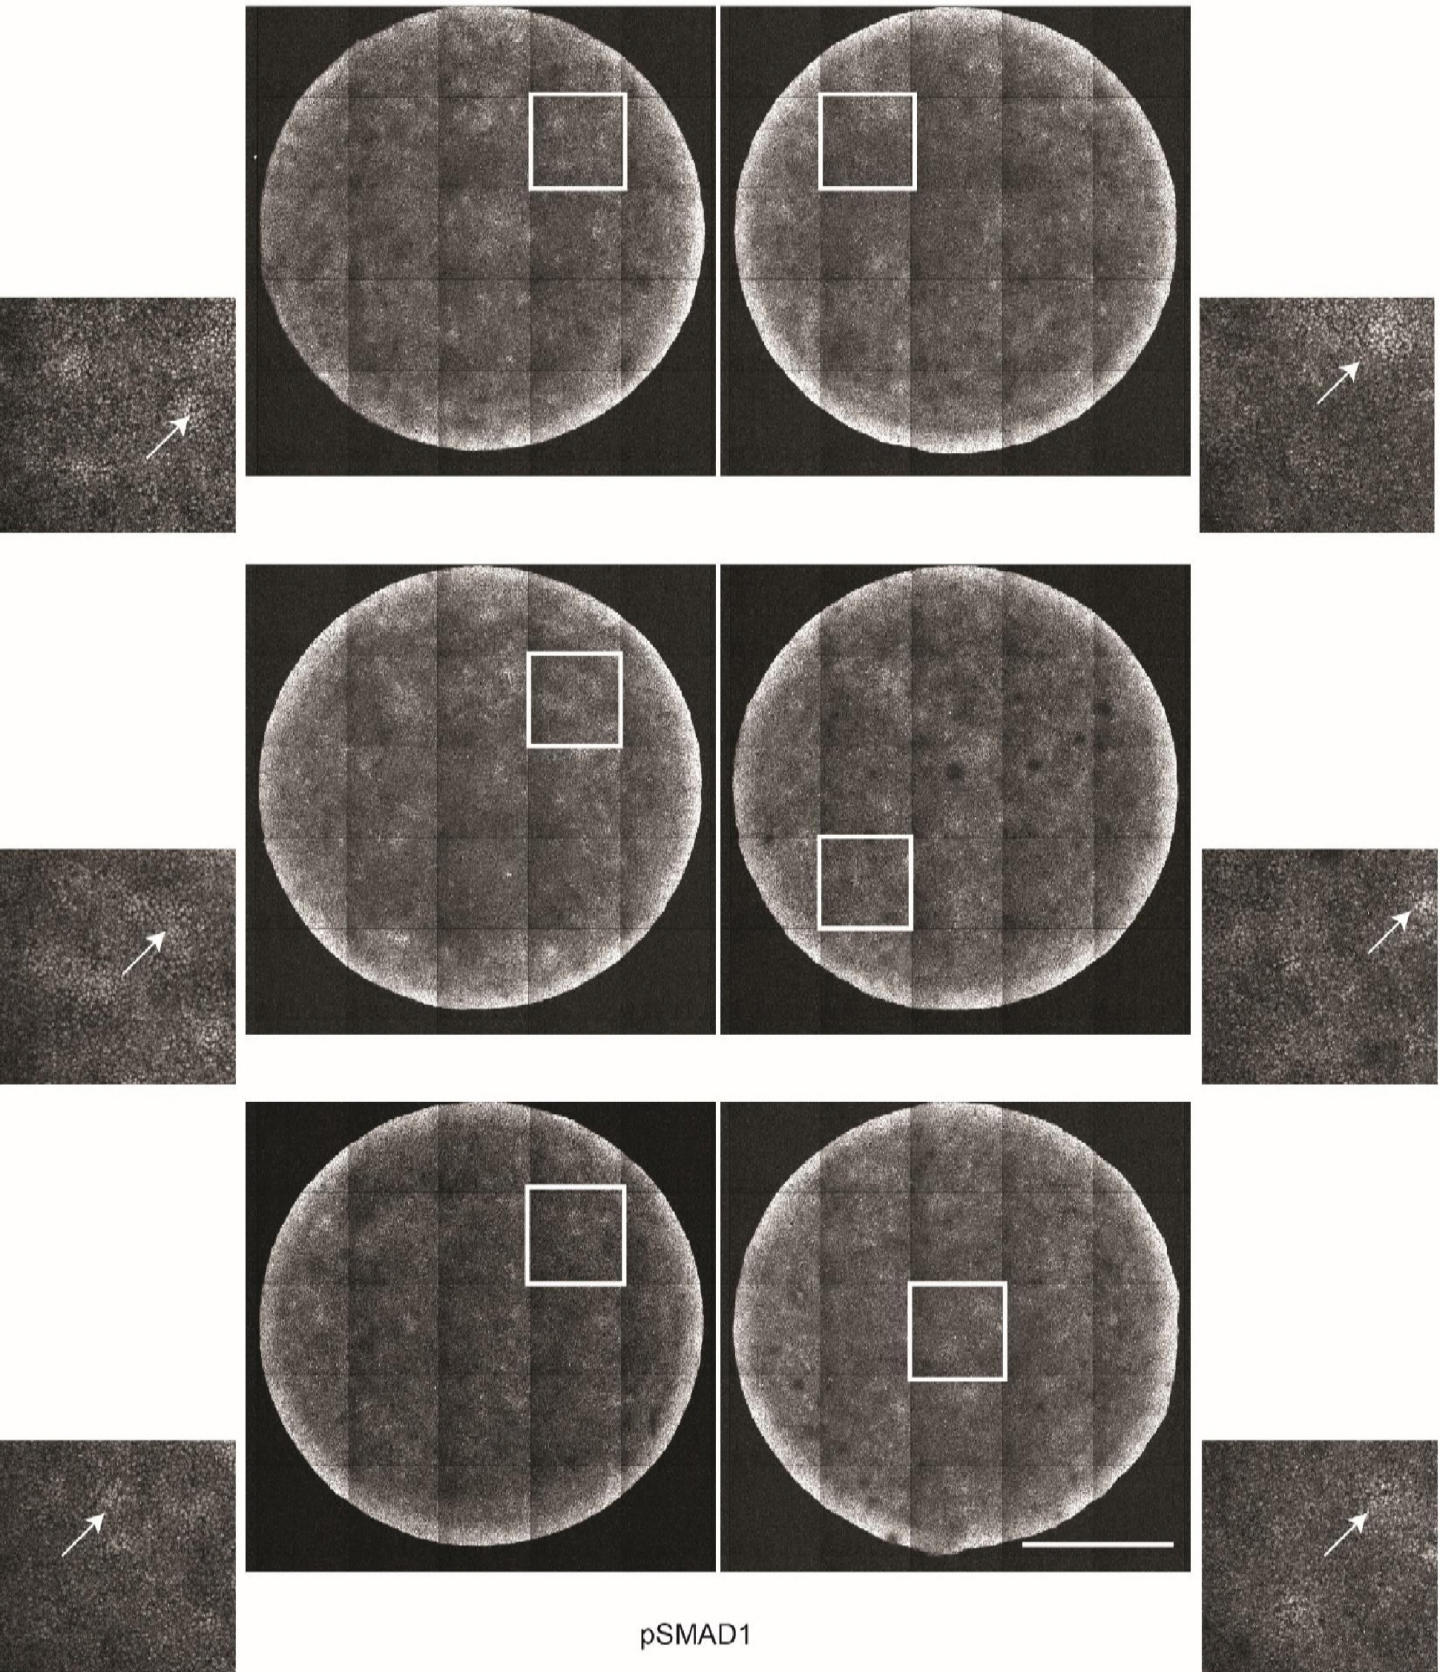

# Sup Fig. 20

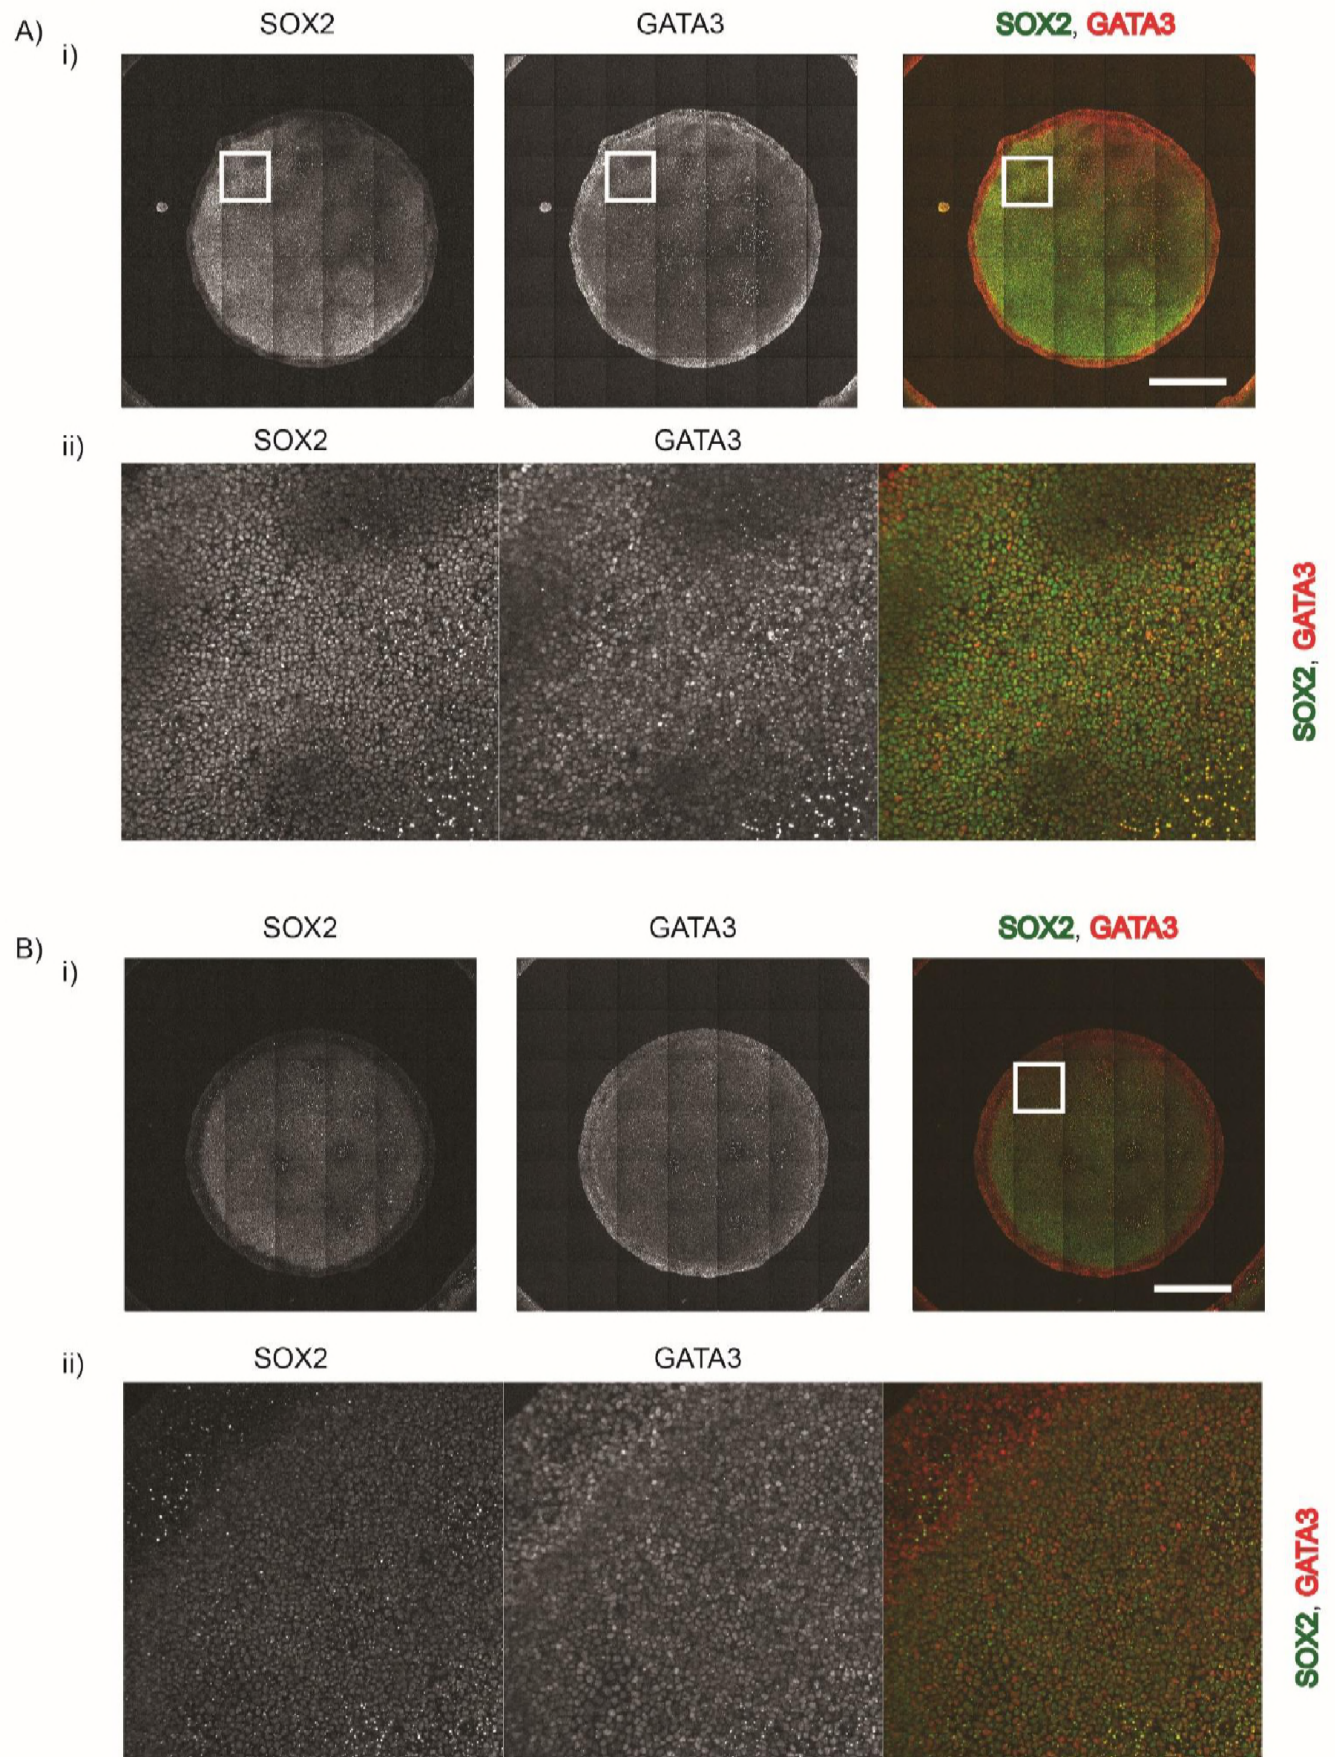

# Sup Fig. 21

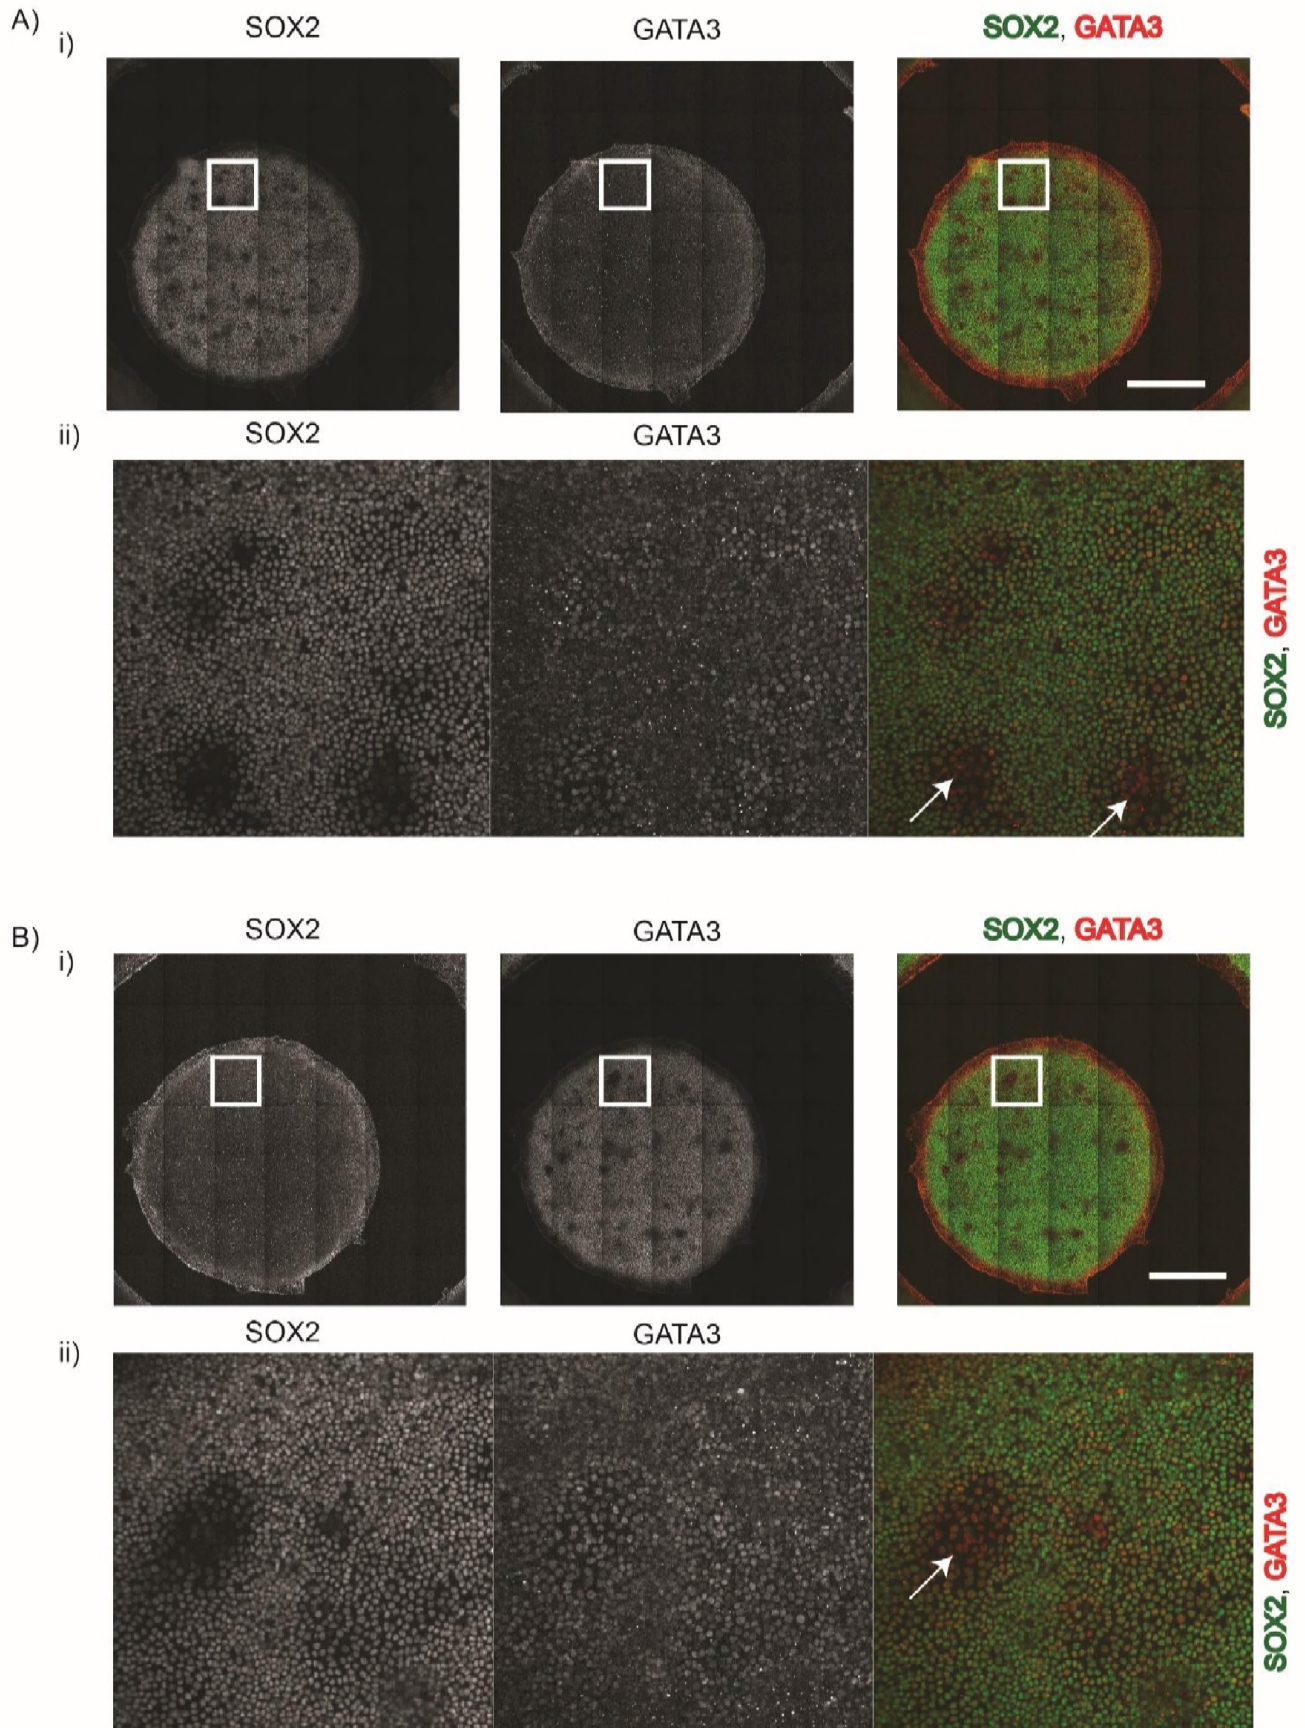

Sup Fig. 22

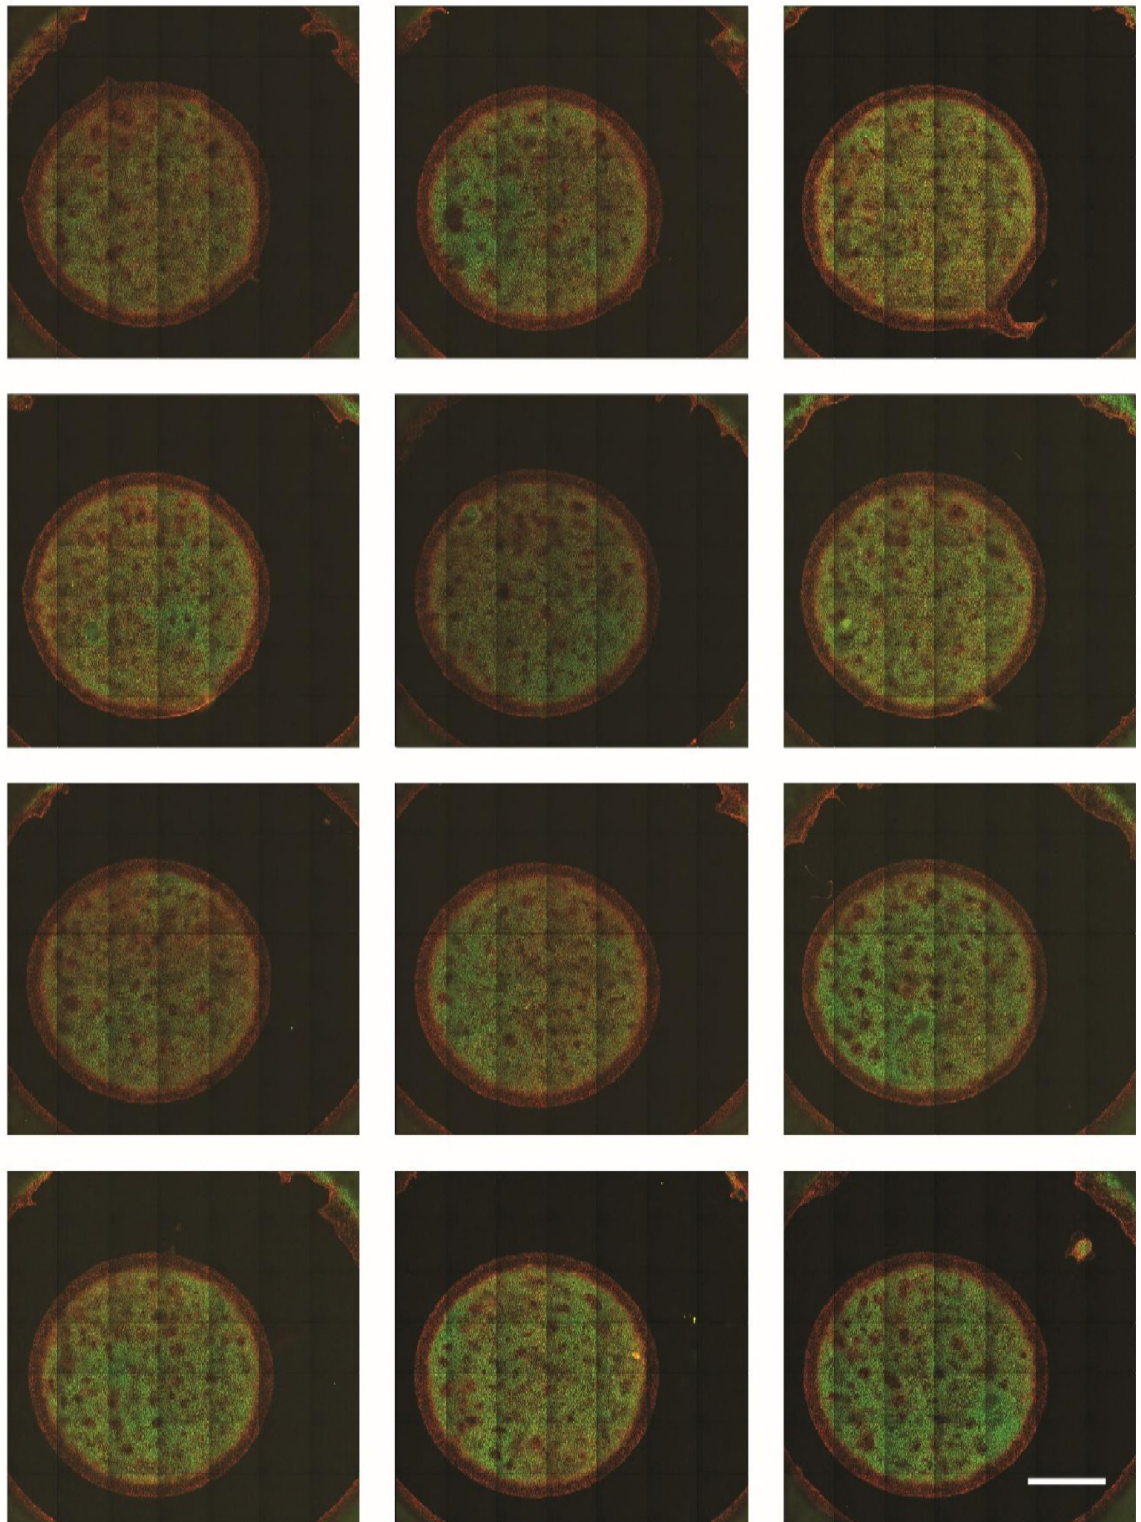

SOX2, GATA3

Table S1

| hPSC lines | Parental Source | Reporter?   | Culture Conditions | Media | Source              |
|------------|-----------------|-------------|--------------------|-------|---------------------|
| H1         | H1              | No          | Feeders            | KOSR  | WiCell              |
| H7         | H7              | No          | Feeders            | KOSR  | WiCell              |
| H9-1       | H9              | Yes (Wnt)*  | Feeder Free        | mTeSR | Dr. Sean Palecek    |
| H9-2       | H9              | No          | Feeder Free        | mTeSR | Dr. Gordon Keller   |
| H9-3       | H9              | No          | Feeders            | KOSR  | WiCell              |
| HES2       | HES2            | No          | Feeders            | KOSR  | Dr. Gordon Keller   |
| HES3-1     | HES3            | Yes - MIXL1 | Feeders            | KOSR  | Dr. Andrew Elefanty |
| HES3-2     | HES3            | Yes - RUNX1 | Feeders            | KOSR  | Dr. Andrew Elefanty |
| MEL1       | MEL1            | Yes -PDX1   | Feeders            | KOSR  | Dr. Gordon Keller   |
| CA1        | CA1             | No          | Feeder Free        | mTeSR | Dr. Andras Nagy     |

\* The wnt reported line was generated using a puromicine selection cassette. We did not perform any selection and consequently, the wnt activity reporter was undetectable in any of our experiments.



Table S2

| Gene Name | Forward                    | Reverse                   |
|-----------|----------------------------|---------------------------|
| GAPDH     | GTTTACATGTTCCAATATGATTCCAC | TGGAAGATGGTGATGGGATT      |
| POU5F1    | AGCGATCAAGCAGCGACTAT       | AGAGTGGTGACGGAGACAGG      |
| NANOG     | ACCTTCCAATGTGGAGCAAC       | GAGAATTTGGCTGGAAGTGC      |
| MIXL1     | CAGAACAGGCGTGCCAAGTC       | TTCCAGGAGCACAGTGGTTGA     |
| T         | CCTTGCTCACACCTGCAGTAG      | GGCCAACTGCATCATCTCCA      |
| EOMES     | ACCCCTTCCATCAAATCTC        | CCATGCCTTTTGAGGTGTCT      |
| KDR       | GCATGGAAGAGGATTCTGGA       | CTGATTCTGCTGTGTTGTCA      |
| MYB       | CATTTGATCCGCATCCCTG        | TCAAAGTTCAGTGCTGGCC       |
| HAND1     | GCCTAGCCACCAGCTACATC       | ATCCGCCTTCTTGAGTTCAG      |
| MESP1     | CCCAAGTGACAAGGGACAAC       | TCTTCCAGGAAAGGCAGTCT      |
| PAX6      | GTGTCCAACGGATGTGTGAG       | AGACCCCTCGGACAGTAAT       |
| OTX2      | GCCAATCCTTGGTTGAATCTTAGG   | CAATCAGTCACACAATTCACACAGC |
| SOX1      | CAGGCCATGGATGAAGGA         | CTTAATTGCTGGGGAATTG       |
| TAL1      | ACTTGCCTTCTAAGCCTGT        | CATTCACTCGCCAGCATGAA      |
| RUNX1     | CAATTTGCCTCTGTGTGCCT       | ATAGGGTAGGGTCTCAGCCT      |
| SOX17     | TTCGTGTGCAAGCCTGAGATG      | GTCGGACACCACCGAGGAA       |
| FOXA2     | ACCACTACGCCTTCAACCAC       | GGGGTAGTGATCACCTGTT       |
| SOX9      | AGGAAGCTCGCGGACCAGTAC      | GGTGGTCCTTCTTGCTGCAC      |
| TFAP2A    | AGGTCAATCTCCCTACACGAG      | GGAGTAAGGATCTTGC GACTGG   |
| DLX5      | TTCCAAGCTCCGTTCCAGAC       | GAATCGGTAGCTGAAGACTCG     |
| GATA4     | TCCAAACCAGAAAACGGAAG       | AAGACCAGGCTGTTCCAAGA      |
| GATA6     | TCCACTCGTGTCTGCTTTTG       | TCCTAGTCCTGGCTTCTGGA      |
| GATA3     | TCCTGTGCGAACTGTCAGAC       | TCGGTTTCTGGTCTGGATGC      |
| SIX1      | CCTCACAACCACCCAAACT        | AGTGAAATTTTCGGCGCAC       |
| SIX3      | CTCCTCCTCCATCCCCAGAA       | GTGGTAGATGGTGGTTGGGG      |
| EVX1      | GACCAGATGCGTCGTTACCG       | GTGGTTTCCGGCAGGTTTAG      |
| NODAL     | TGAGCCAACAAGAGGATCTG       | TGAAAATCTCAATGGCAAG       |
| GDF3      | GTA TCTCGCTTTCTCCAGAC      | GCCAATGTCAACTGTTCCCTT     |
| BMP4      | ATGATTCCTGGTAACCGAATGC     | CCCCGTCTCAGGTATCAAAC T    |
| NOGGIN    | GAAGCTGCGGAGGAAGTTAC       | TACAGCACGGGGCAGAAT        |
| CERL      | CTTCTCAGGGGGTCACTTG        | TCCCAAAGCAAAGGTTGTT C     |
| LEFTY1    | CTGGACCTCAGGGACTATGG       | CACACACTCGTAAGCCAGGA      |

Table S3

| Protein     | Company (cat#)          | Concentration |
|-------------|-------------------------|---------------|
| OCT3/4      | BD Biosciences (561556) | 1/500         |
| NANOG       | Cell Signaling (4903S)  | 1/200         |
| Brachyury   | R&D (AF2085)            | 1/500         |
| SOX2        | R&D (AF2018, MAB2018)   | 1/500         |
| beta-Actin  | Cell Signaling (3700S)  | 1/200         |
| VECAD       | Cedarlane (160840)      | 1/500         |
| SOX17       | R&D (AF1924)            | 1/500         |
| FOXA2       | Abnova (H00003170-M12)  | 1/250         |
| pSMAD1      | Cell Signaling (9516S)  | 1/100         |
| GATA3       | Abcam (AB199428)        | 1/250         |
| EOMES       | Abcam (AB23345)         | 1/500         |
| TFAP2A      | Abcam (AB52222)         | 1/200         |
| SIX1        | Abcam (AB211359)        | 1/200         |
| OTX2        | EMD Millipore (ab9566)  | 1/500         |
| GATA6       | R&D (AF1700)            | 1/500         |
| PAX3        | R&D (MAB2457)           | 1/500         |
| PAX6        | R&D(AF8150)             | 1/250         |
| DLX5        | Abcam (AB64827)         | 1/500         |
| Pan Keratin | Abcam (AB8068)          | 1/50          |
| SOX10       | R&D (MAB2864)           | 1/200         |
